# Supplementary material for: Synthesis and Anti-Neuroinflammatory Activity of 1,7-diphenyl-1,4-heptadien-3-ones in LPS-Stimulated BV2 Microglia Via Inhibiting NF-κB/MAPK Signaling Pathways
Source: MDPI journal article supplement (doi:10.3390/molecules27113537), 2022-05-31
Supplement: s1 [file s1]

## Supplementary Materials

# Synthesis and anti-neuroinflammatory activity of 1,7-diphenyl-1,4-heptadien-3-ones in LPS-stimulated BV2 microglia *via* inhibiting NF- $\kappa$ B/MAPK signaling pathways

Xuan Zhao <sup>a</sup>, Jiqing Fang <sup>b</sup>, Yu Jia <sup>a</sup>, Zi Wu <sup>b</sup>, Meihui Zhang <sup>a</sup>, Mingyu Xia <sup>b, \*</sup> and Jinhua Dong <sup>a, \*</sup>

<sup>a</sup> Key Laboratory of Structure-Based Drug Design & Discovery, Ministry of Education, Shenyang Pharmaceutical University, 103 Wenhua Road, Shenhe District, Shenyang City, Liaoning Province, 110016, P.R. China

<sup>b</sup>School of Life Science and Biopharmaceutics, Shenyang Pharmaceutical University, 103 Wenhua Road, Shenhe District, Shenyang City, Liaoning Province, 110016, P.R. China

\* Correspondence: author: E-mail: [xmywd@vip.sina.com](mailto:xmywd@vip.sina.com) (M. Y. Xia);  
[dongjh66@hotmail.com](mailto:dongjh66@hotmail.com) (J. H. Dong)

---

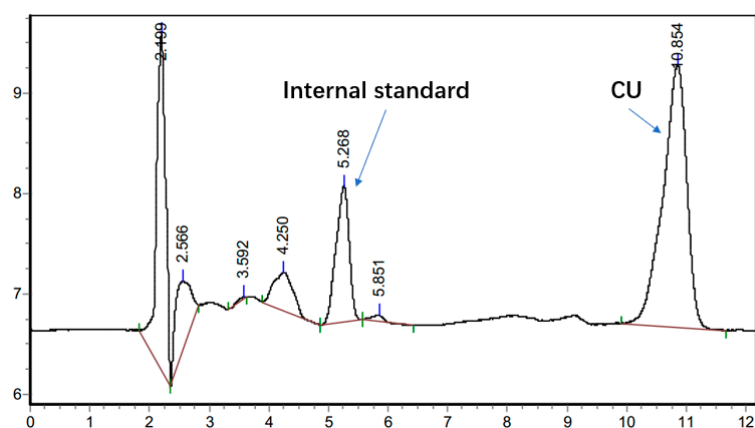

**Figure S1** Representative chromatogram of the determination of CU after intravenous administration 5 min.

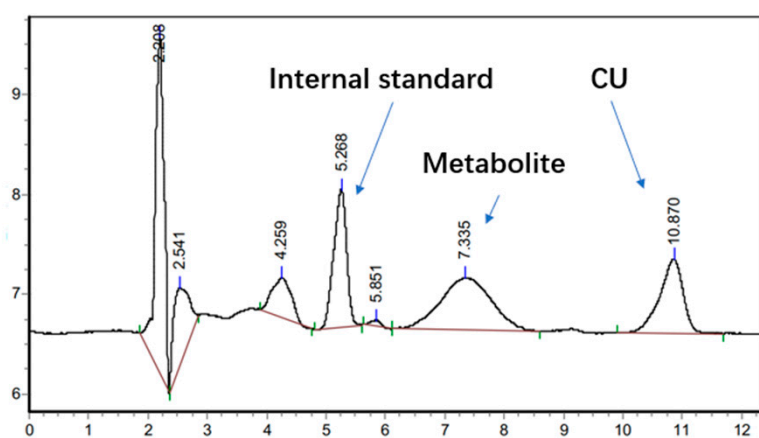

**Figure S2** Representative chromatogram of the determination of CU after intravenous administration 10 min.

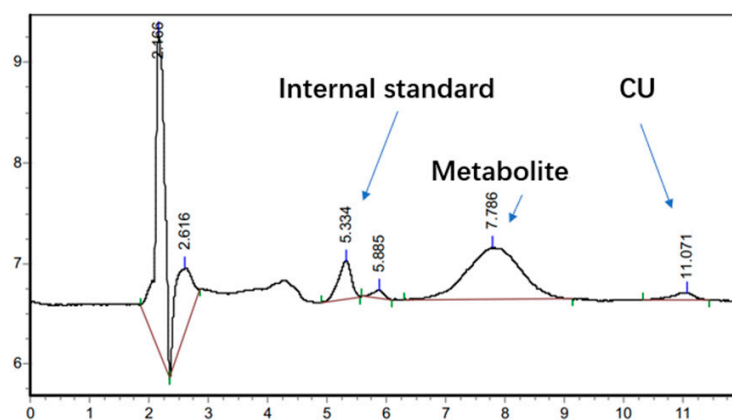

**Figure S3** Representative chromatogram of the determination of CU after intravenous administration 20 min.

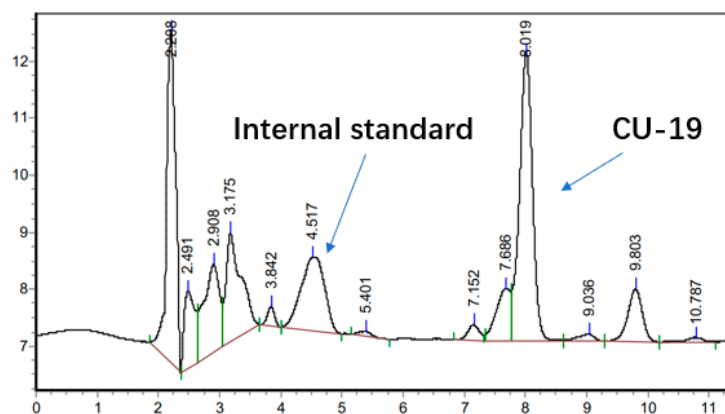

**Figure S4** Representative chromatogram of the determination of CU-19 after intravenous administration 5 min.

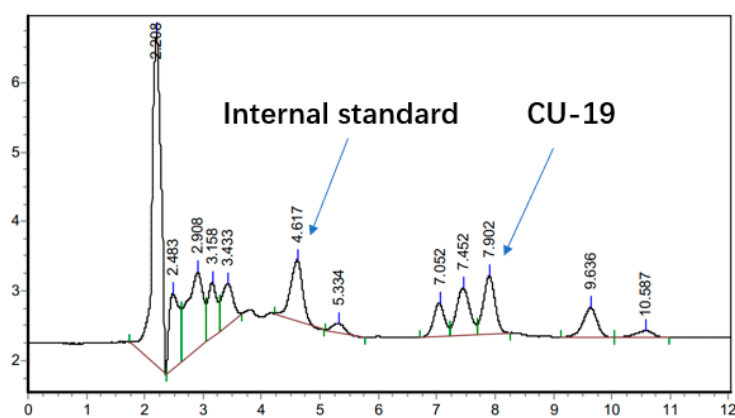

**Figure S5** Representative chromatogram of the determination of CU-19 after intravenous administration 10 min.

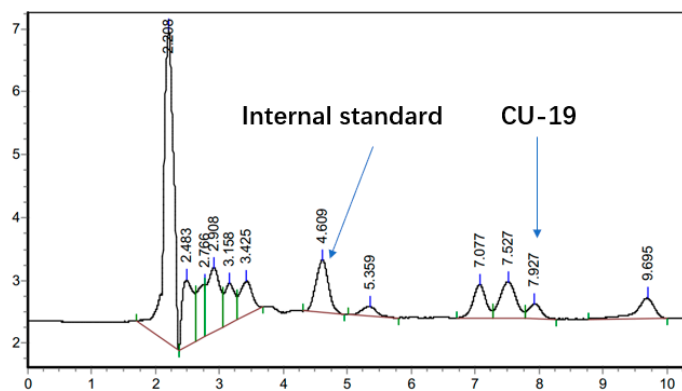

**Figure S6** Representative chromatogram of the determination of CU-19 after intravenous administration 20 min.

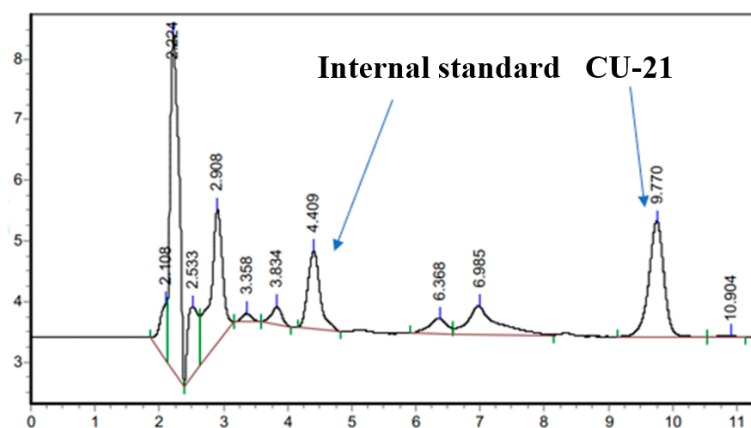

**Figure S7 Representative chromatogram of the determination of CU-21 after intravenous administration 5 min.**

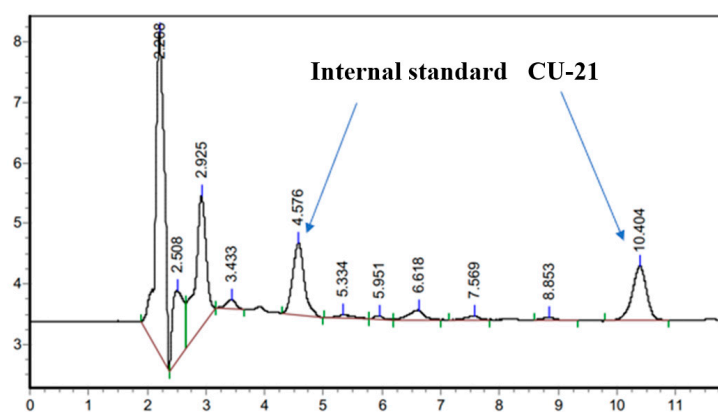

**Figure S8 Representative chromatogram of the determination of CU-21 after intravenous administration 10 min.**

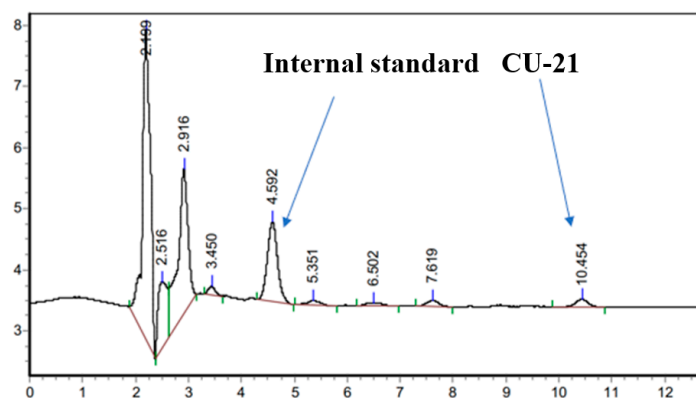

**Figure S9 Representative chromatogram of the determination of CU-21 after intravenous administration 20 min.**



## Spectrums of compounds 2~11

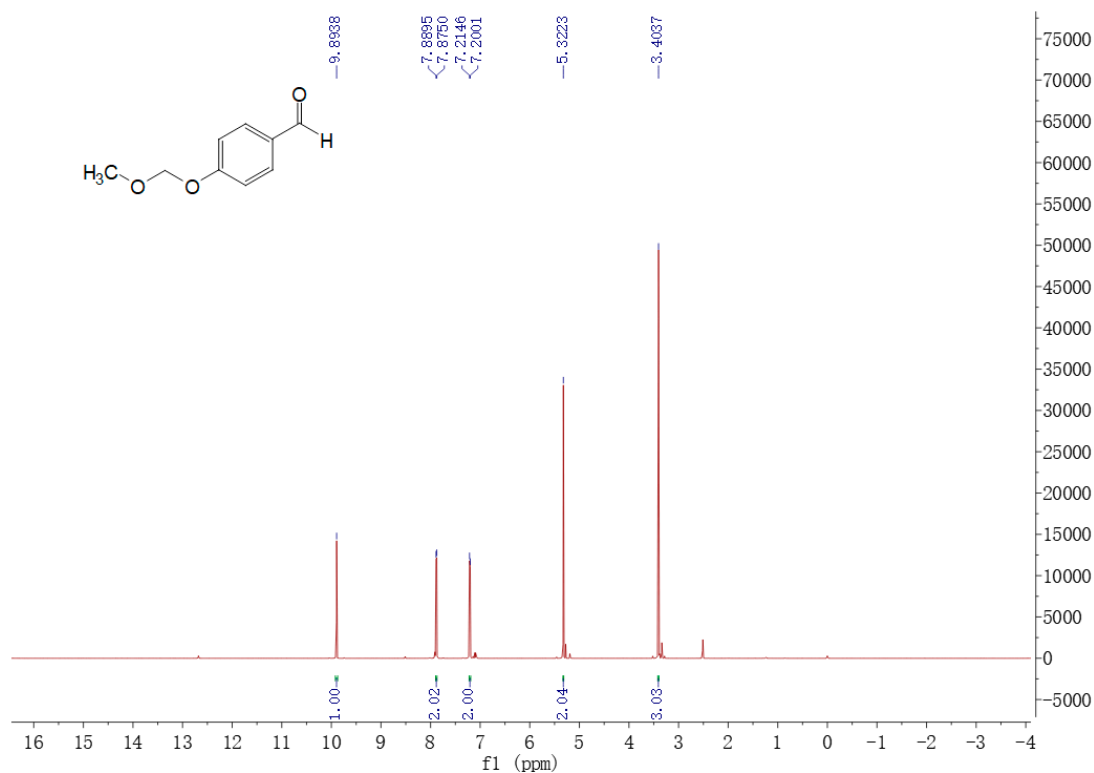

<sup>1</sup>H NMR spectrum of 2 (600 MHz, DMSO-*d*<sub>6</sub>)

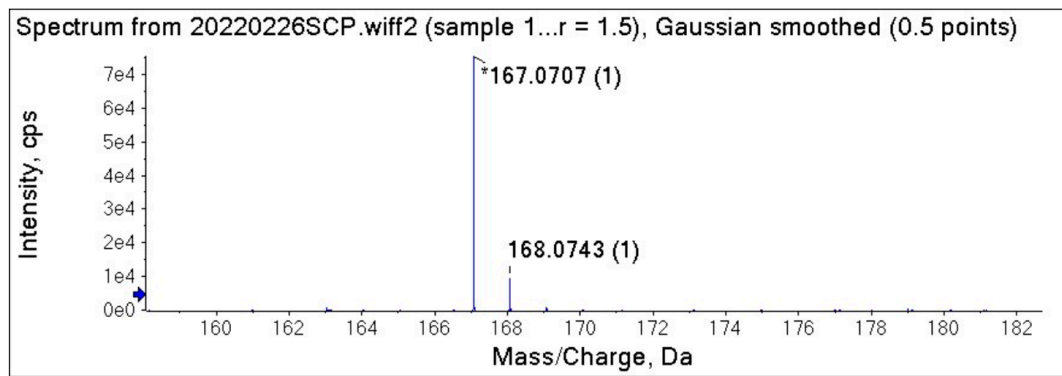

HRMS spectrum of 2

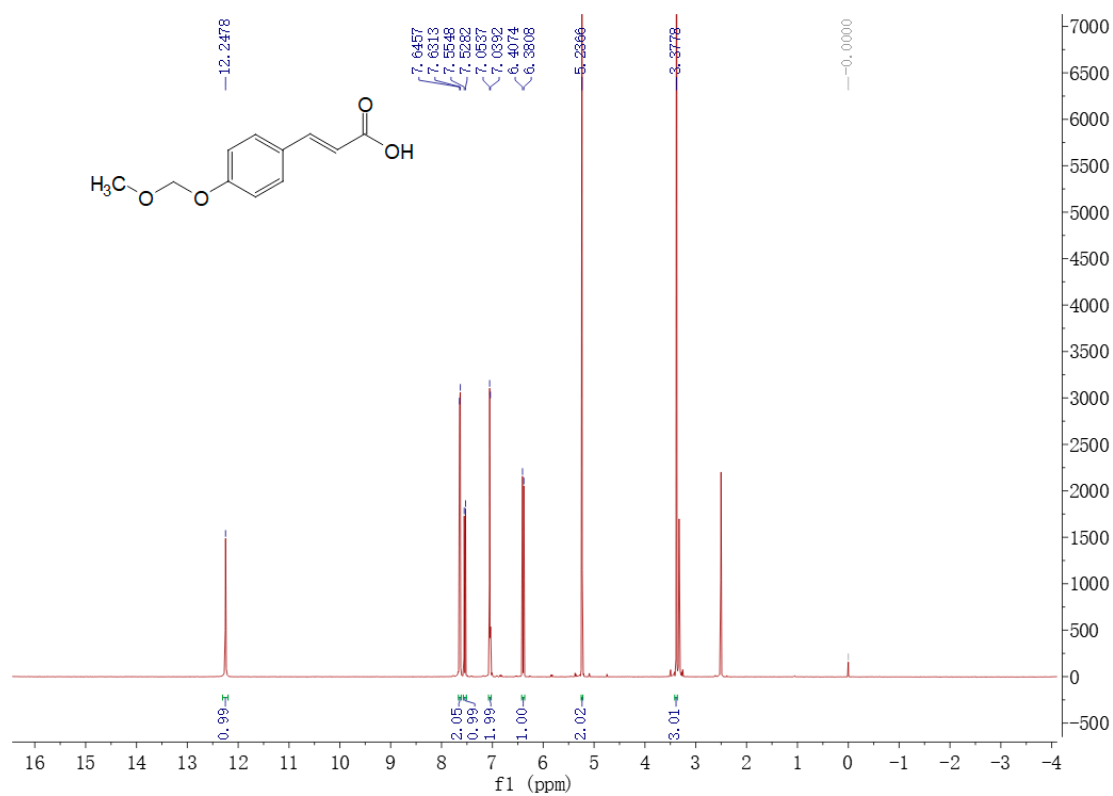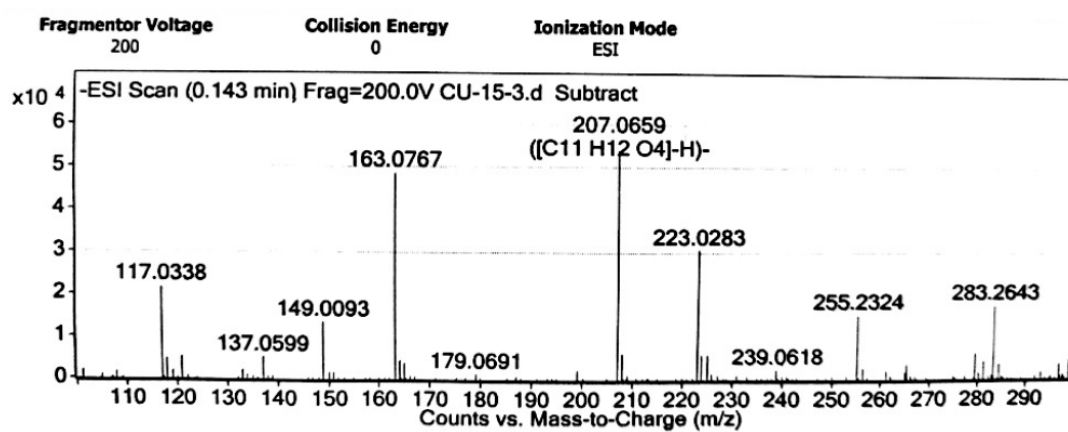

HRMS spectrum of **3**

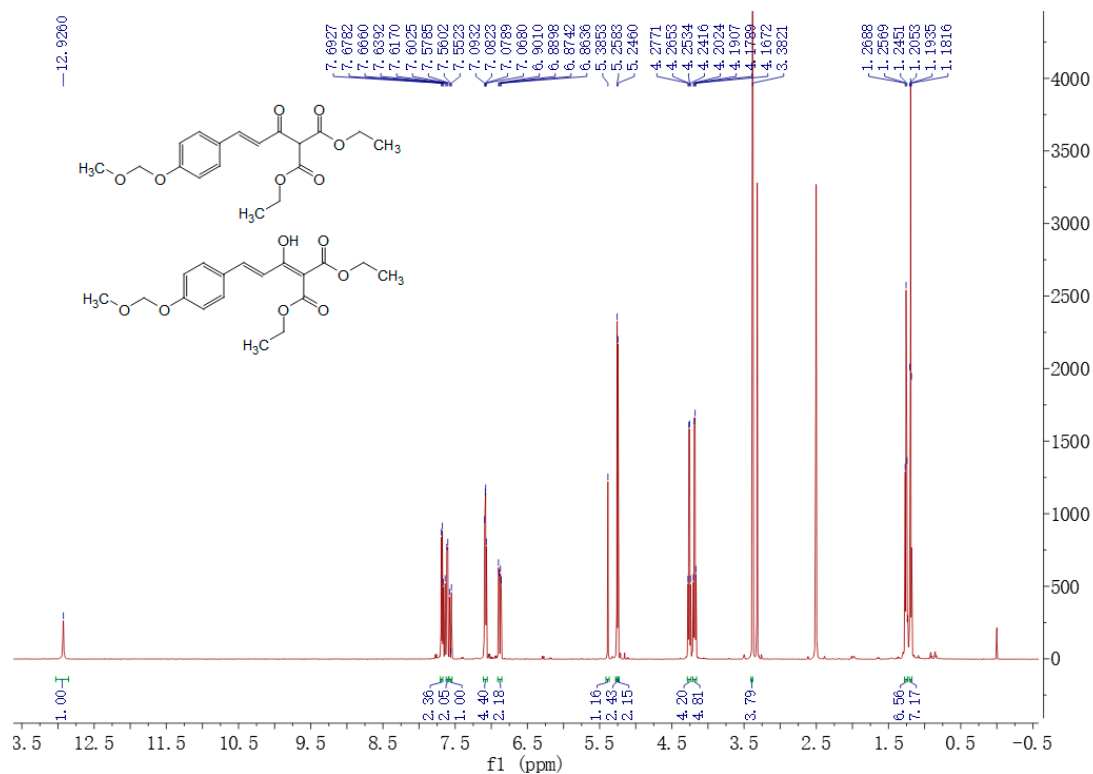

<sup>1</sup>H NMR spectrum of 4 and 4' (600 MHz, DMSO-*d*<sub>6</sub>)

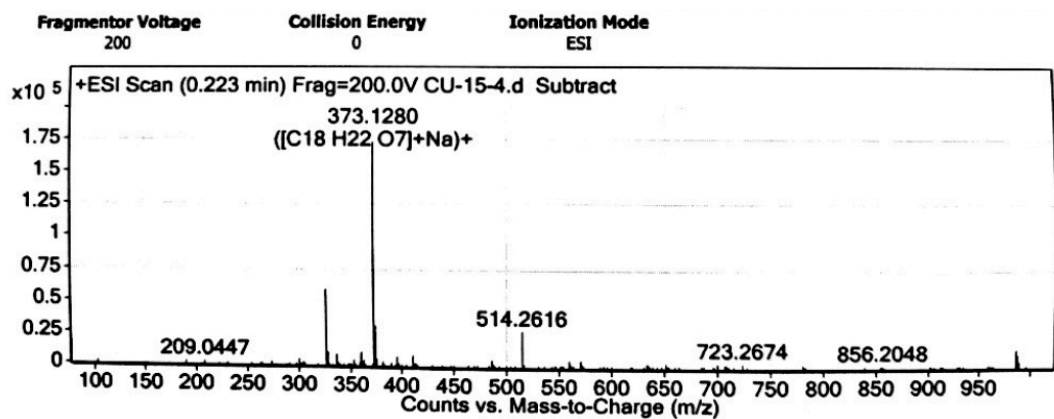

HRMS spectrum of 4 and 4'

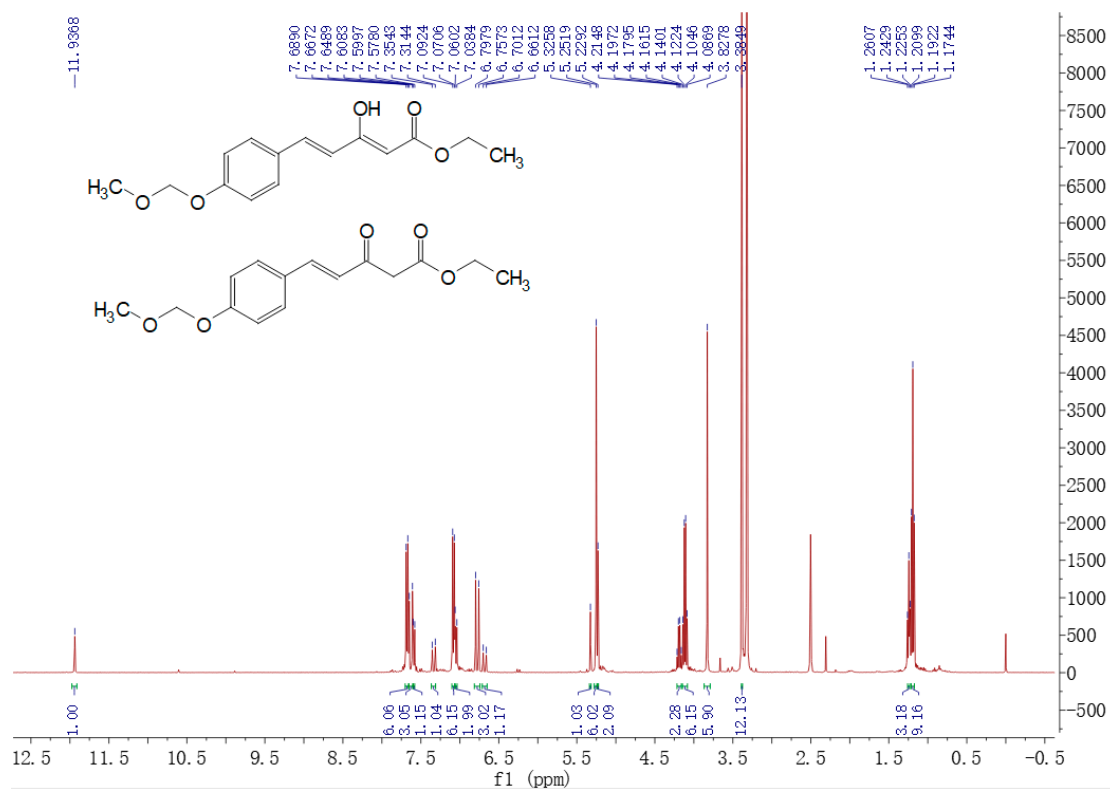

<sup>1</sup>H NMR spectrum of **5** and **5'** (600 MHz, DMSO-*d*<sub>6</sub>)

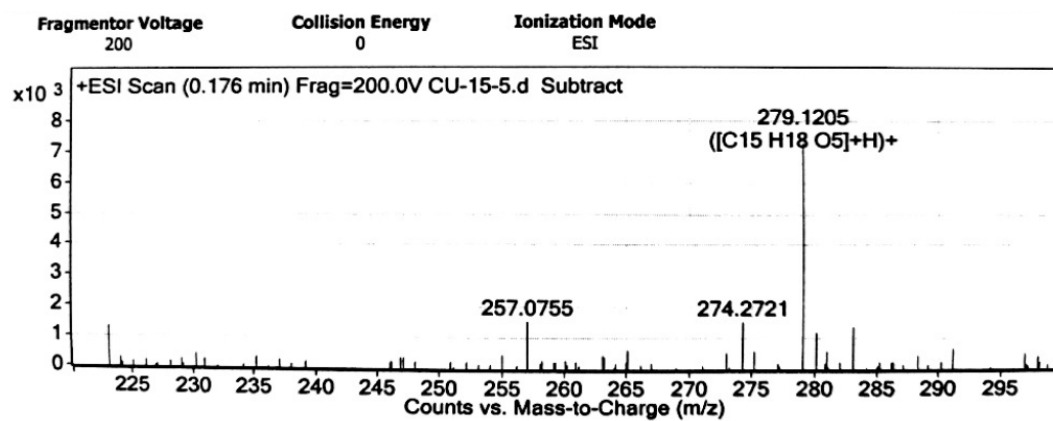

HRMS spectrum of **5** and **5'**

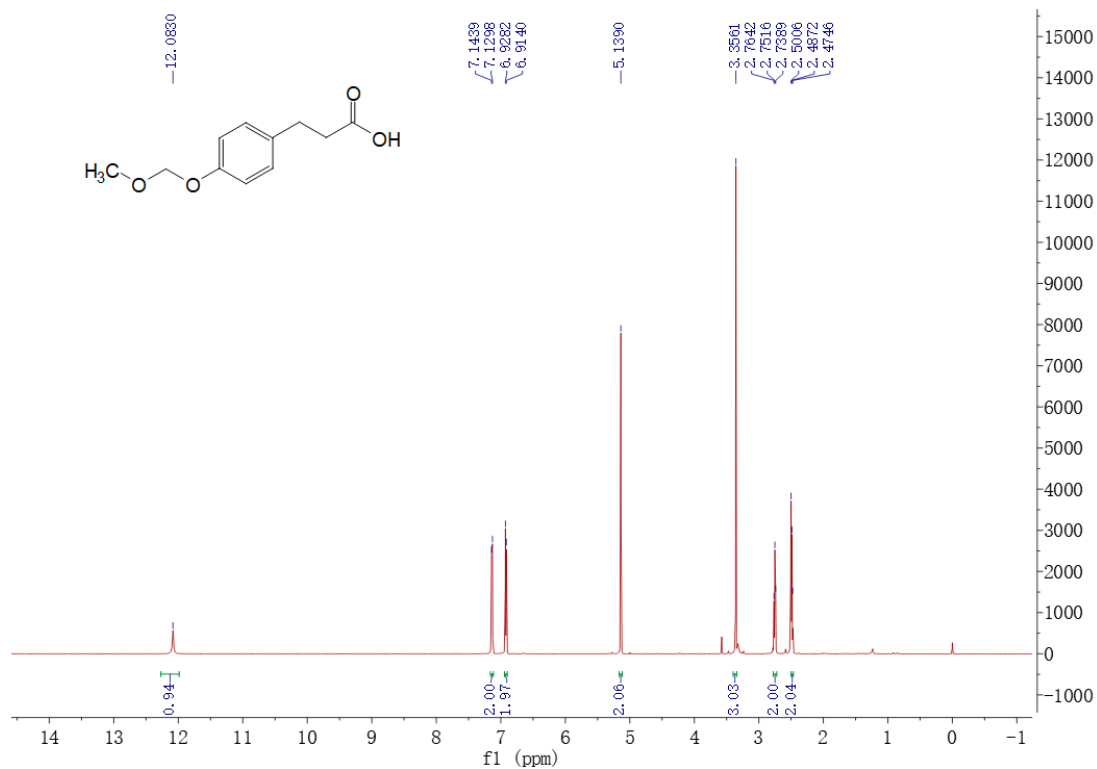

<sup>1</sup>H NMR spectrum of **6** (600 MHz, DMSO-*d*<sub>6</sub>)

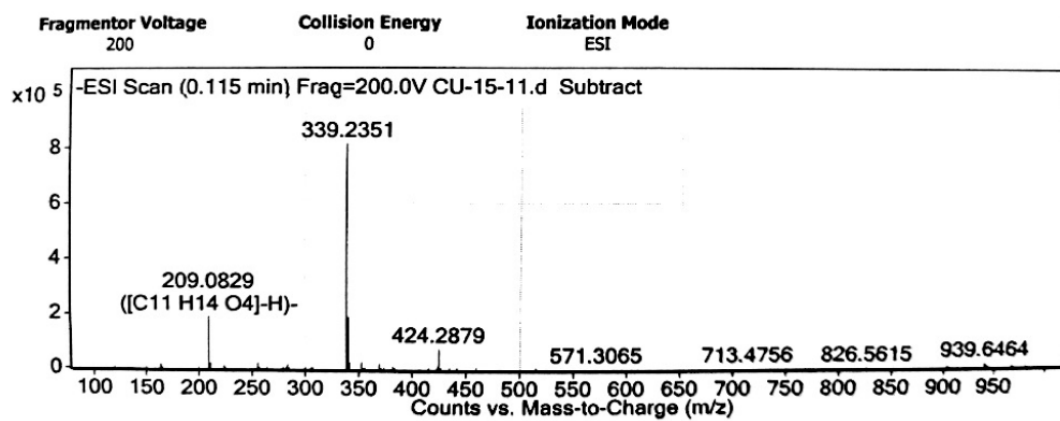

HRMS spectrum of **6**

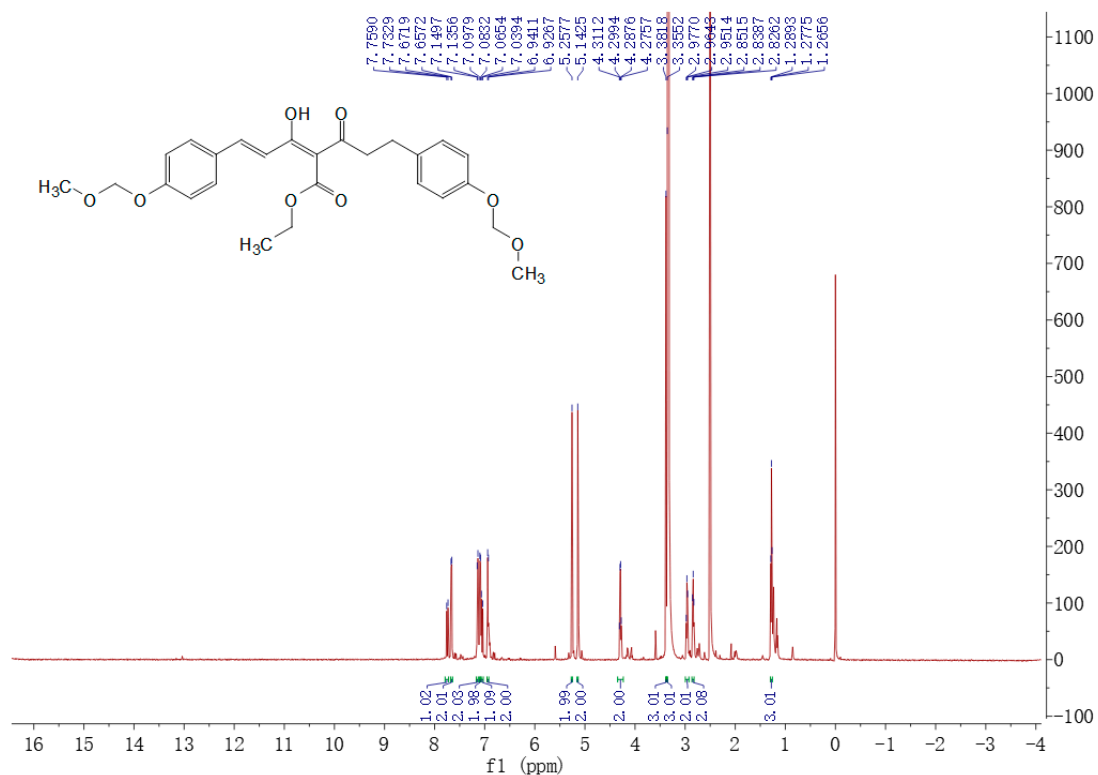

<sup>1</sup>H NMR spectrum of **8** (600 MHz, DMSO-*d*<sub>6</sub>)

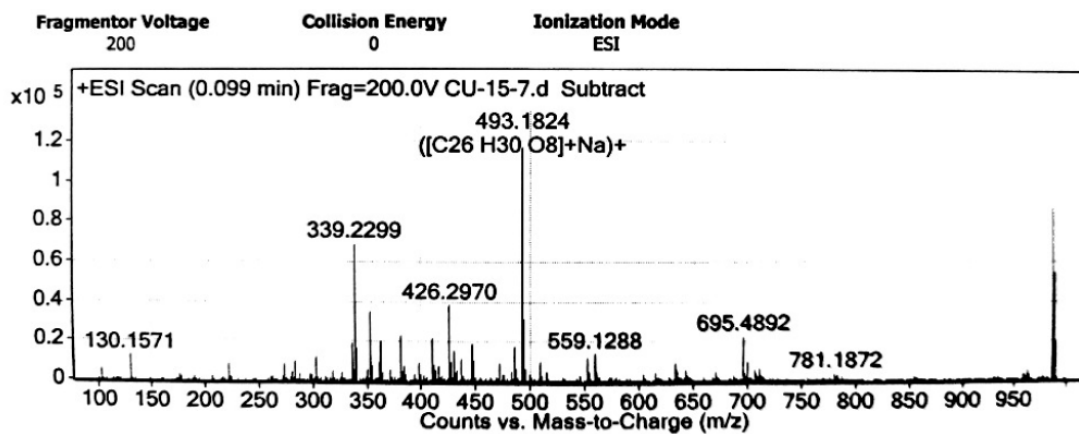

HRMS spectrum of **8**

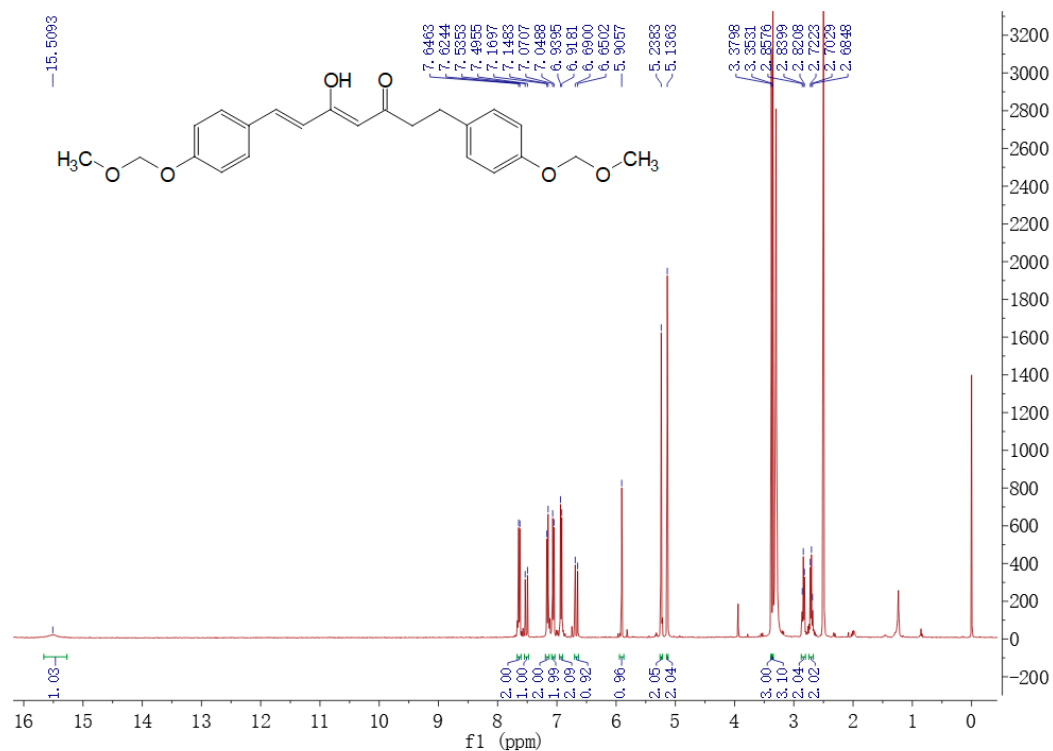

<sup>1</sup>H NMR spectrum of **9** (600 MHz, DMSO-*d*<sub>6</sub>)

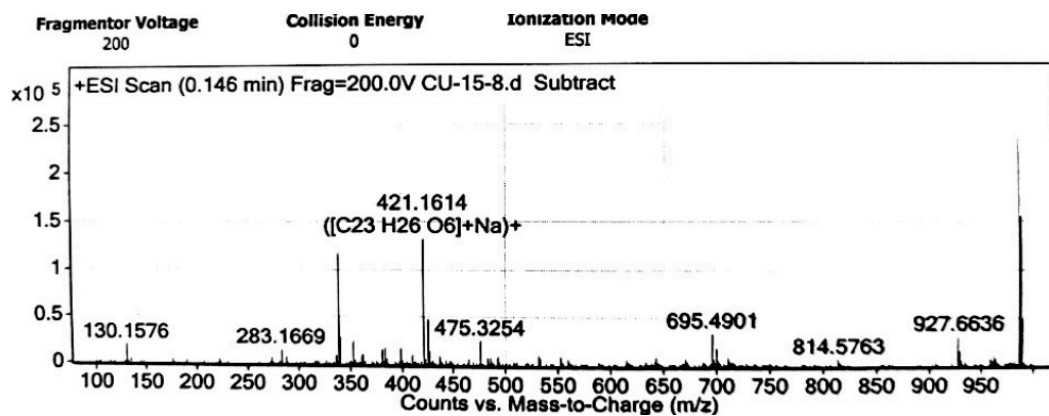

HRMS spectrum of **9**

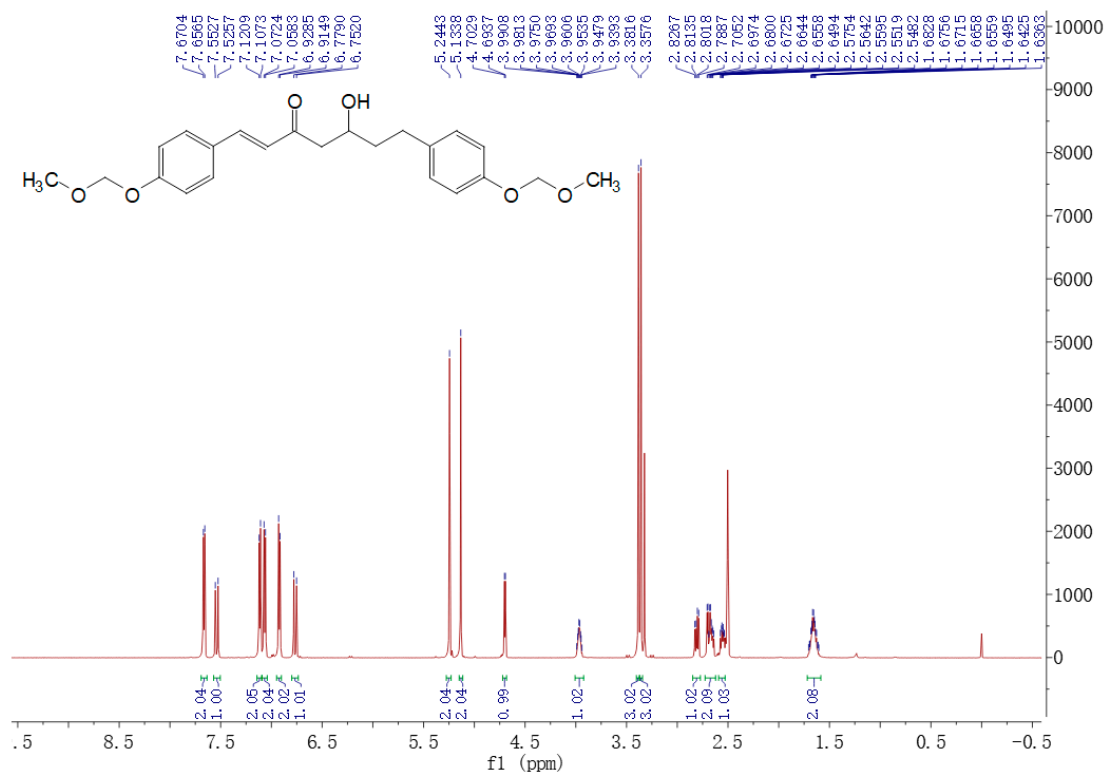

<sup>1</sup>H NMR spectrum of **10** (600 MHz, DMSO-*d*<sub>6</sub>)

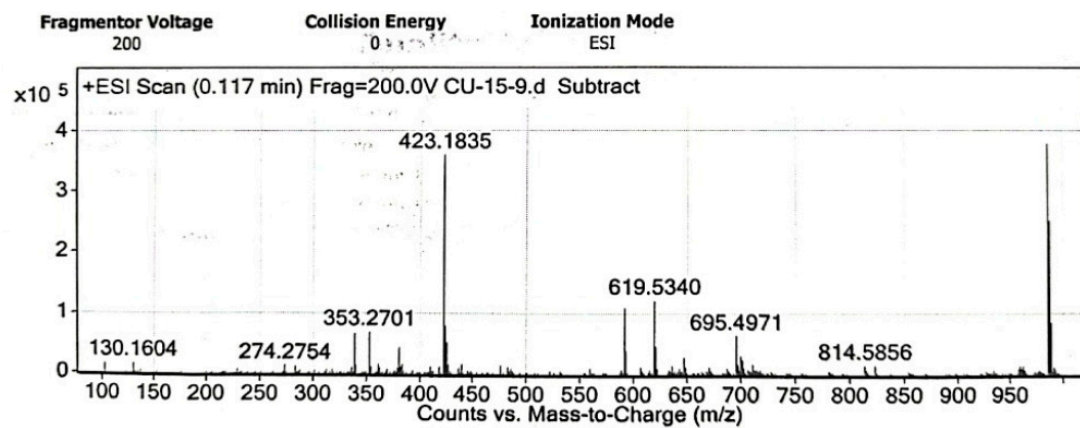

HRMS spectrum of **10**



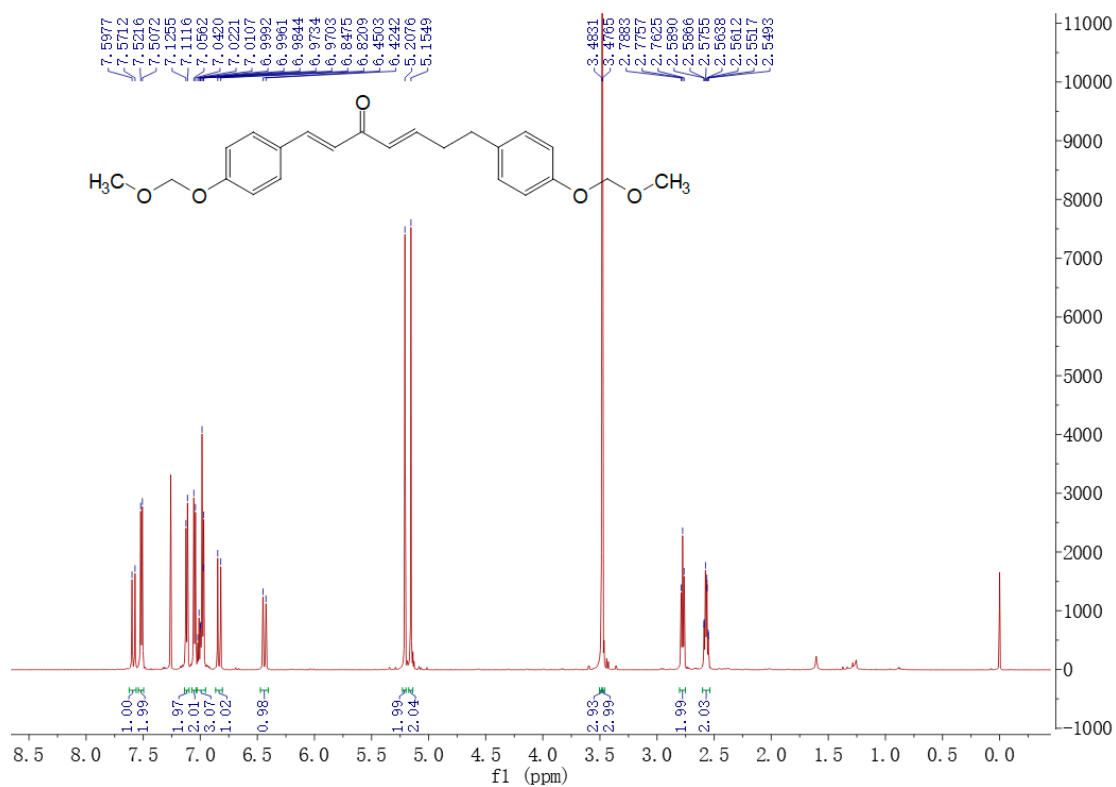

<sup>1</sup>H NMR spectrum of **11** (600 MHz, CDCl<sub>3</sub>)

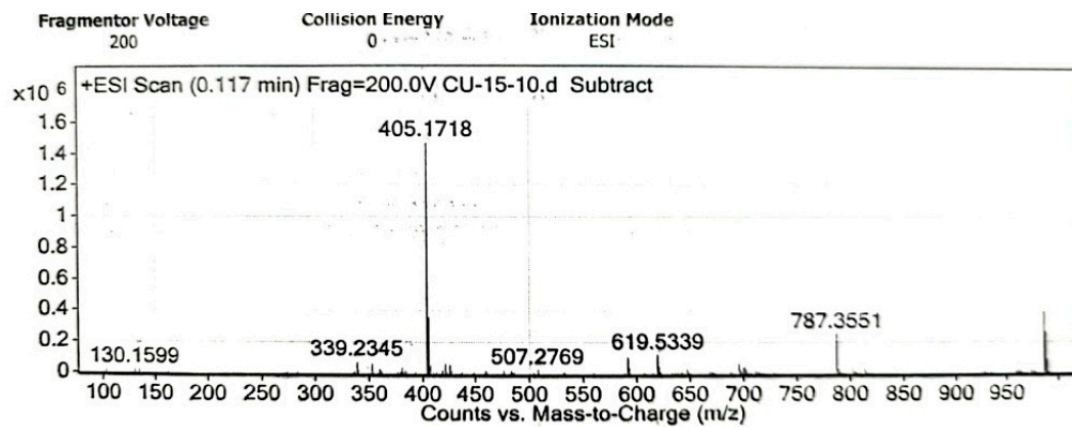

HRMS spectrum of **11**

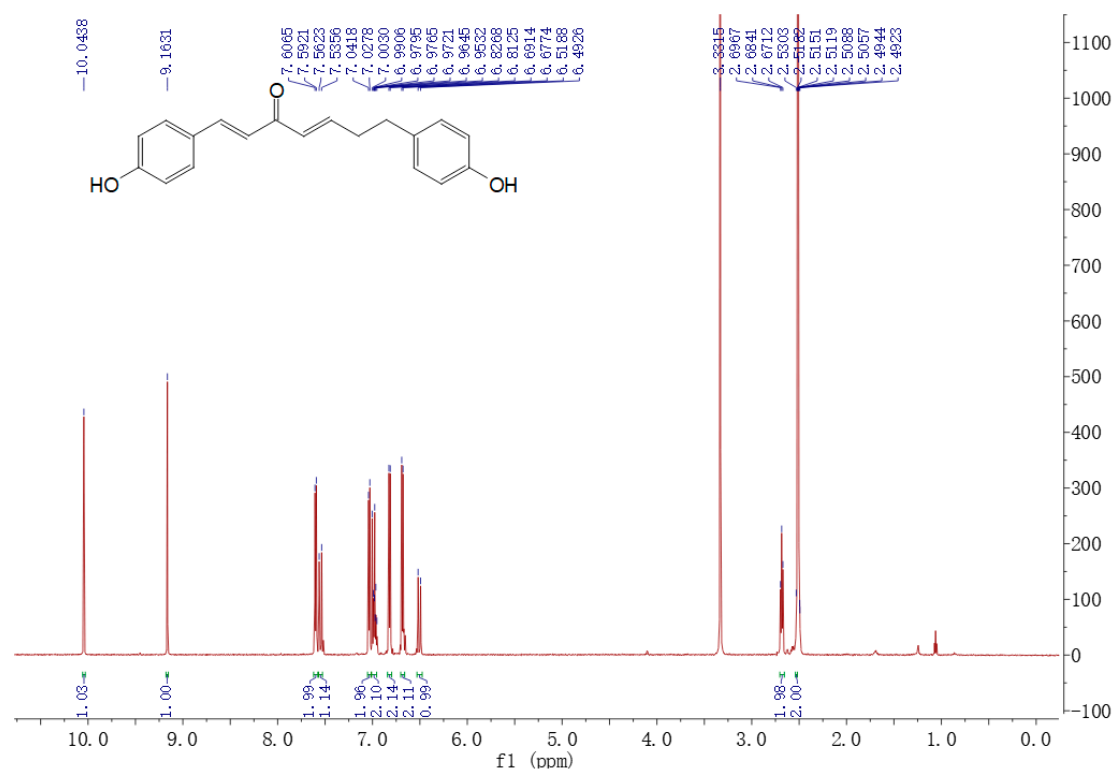

<sup>1</sup>H NMR spectrum of CU-1 (600 MHz, DMSO-*d*<sub>6</sub>)

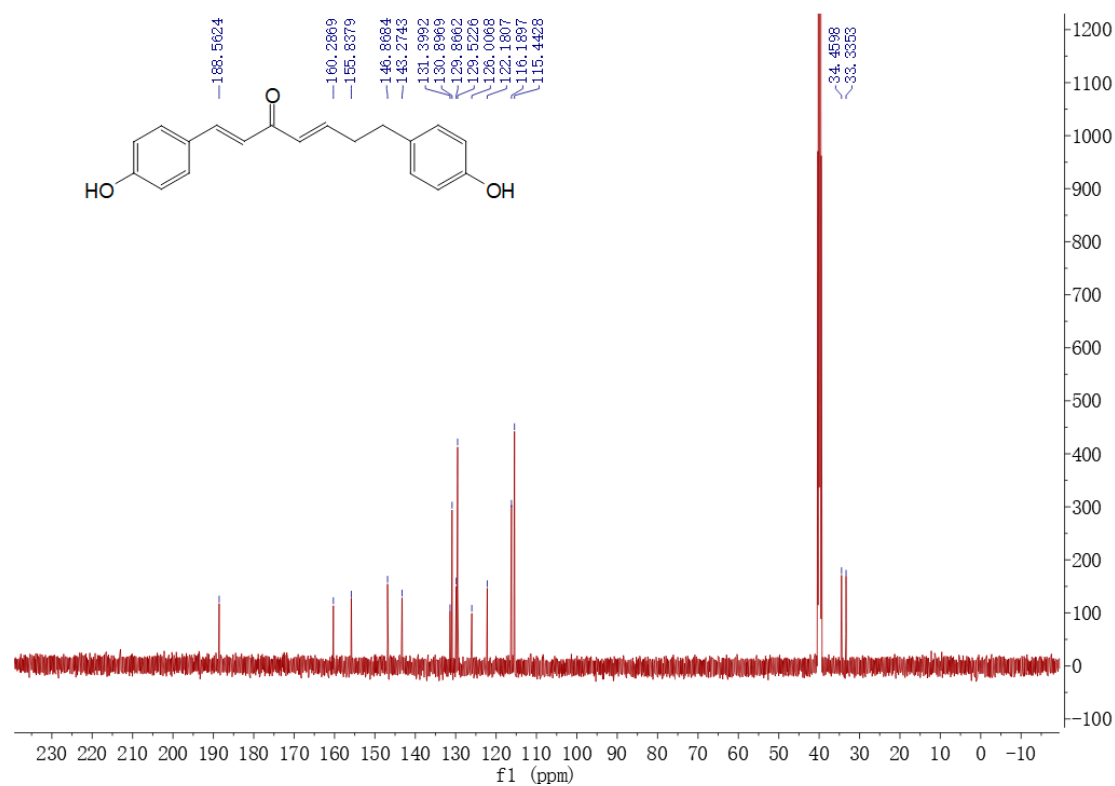

<sup>13</sup>C NMR spectrum of CU-1 (151 MHz, DMSO-*d*<sub>6</sub>)

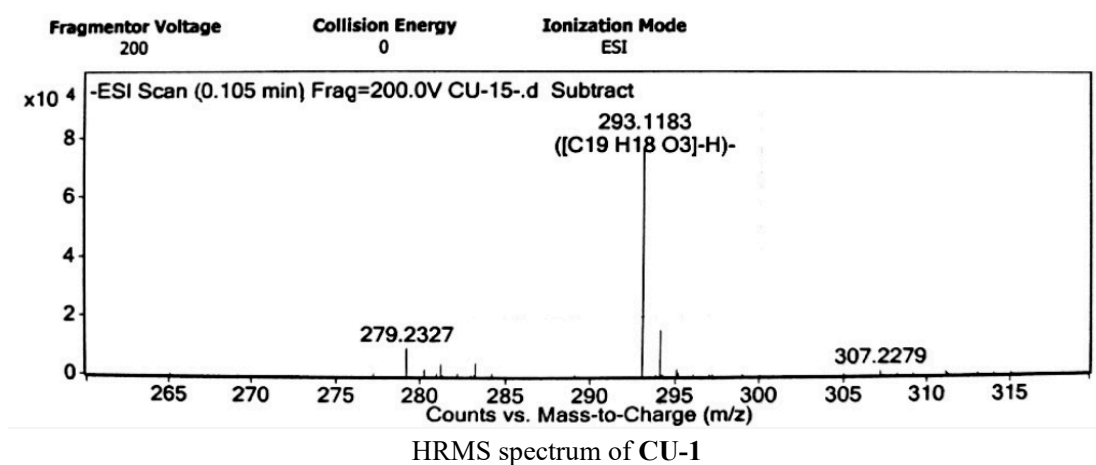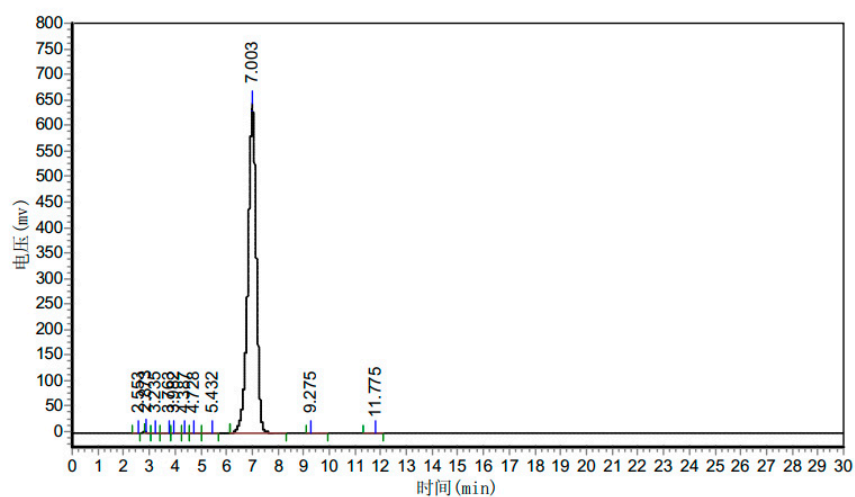

分析结果表

| 峰号 | 峰名 | 保留时间   | 峰高         | 峰面积          | 含量       |
|----|----|--------|------------|--------------|----------|
| 1  |    | 2.553  | 1548.185   | 18139.182    | 0.0980   |
| 2  |    | 2.873  | 3101.354   | 19163.109    | 0.1036   |
| 3  |    | 3.235  | 906.018    | 17409.188    | 0.0941   |
| 4  |    | 3.763  | 1168.499   | 22575.072    | 0.1220   |
| 5  |    | 3.982  | 1991.770   | 35422.590    | 0.1914   |
| 6  |    | 4.387  | 1059.317   | 15540.724    | 0.0840   |
| 7  |    | 4.728  | 831.542    | 20692.996    | 0.1118   |
| 8  |    | 5.432  | 720.256    | 22374.178    | 0.1209   |
| 9  |    | 7.003  | 645418.750 | 18320394.000 | 99.0143  |
| 10 |    | 9.275  | 367.351    | 9083.099     | 0.0491   |
| 11 |    | 11.775 | 86.595     | 1988.392     | 0.0107   |
| 总计 |    |        | 657199.638 | 18502782.528 | 100.0000 |

The HPLC spectrum of CU-1

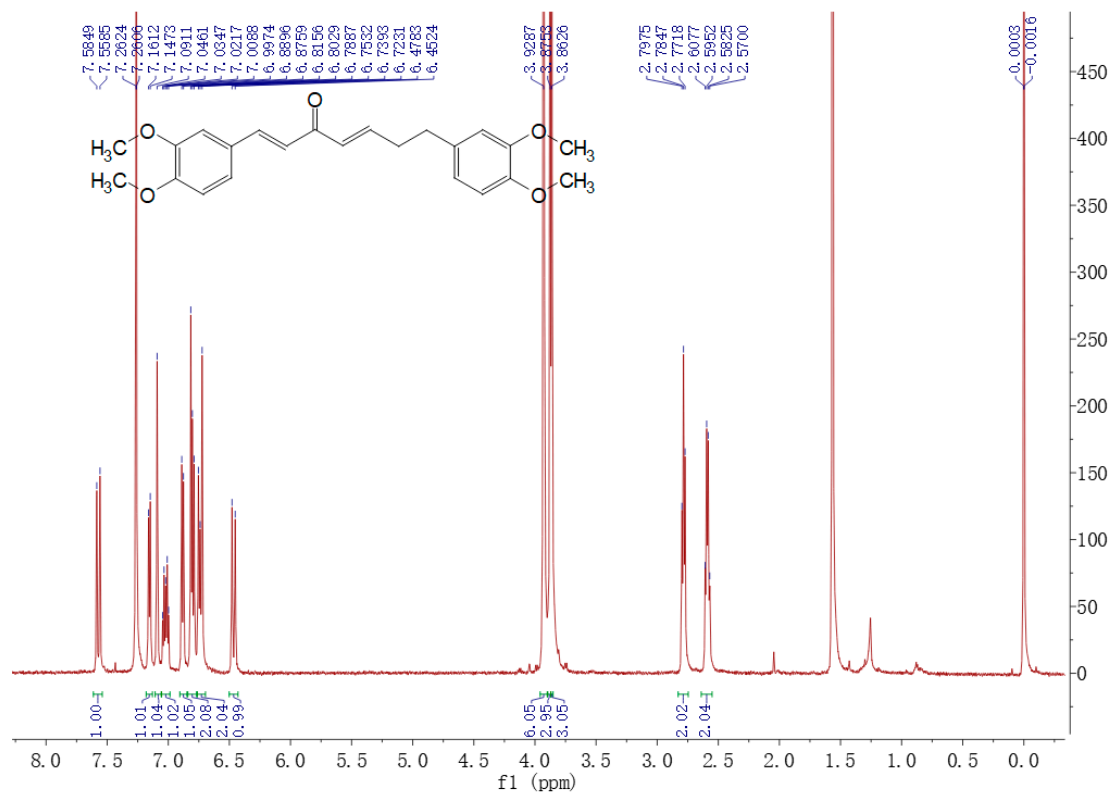

<sup>1</sup>H NMR spectrum of CU-2 (600 MHz, CDCl<sub>3</sub>)

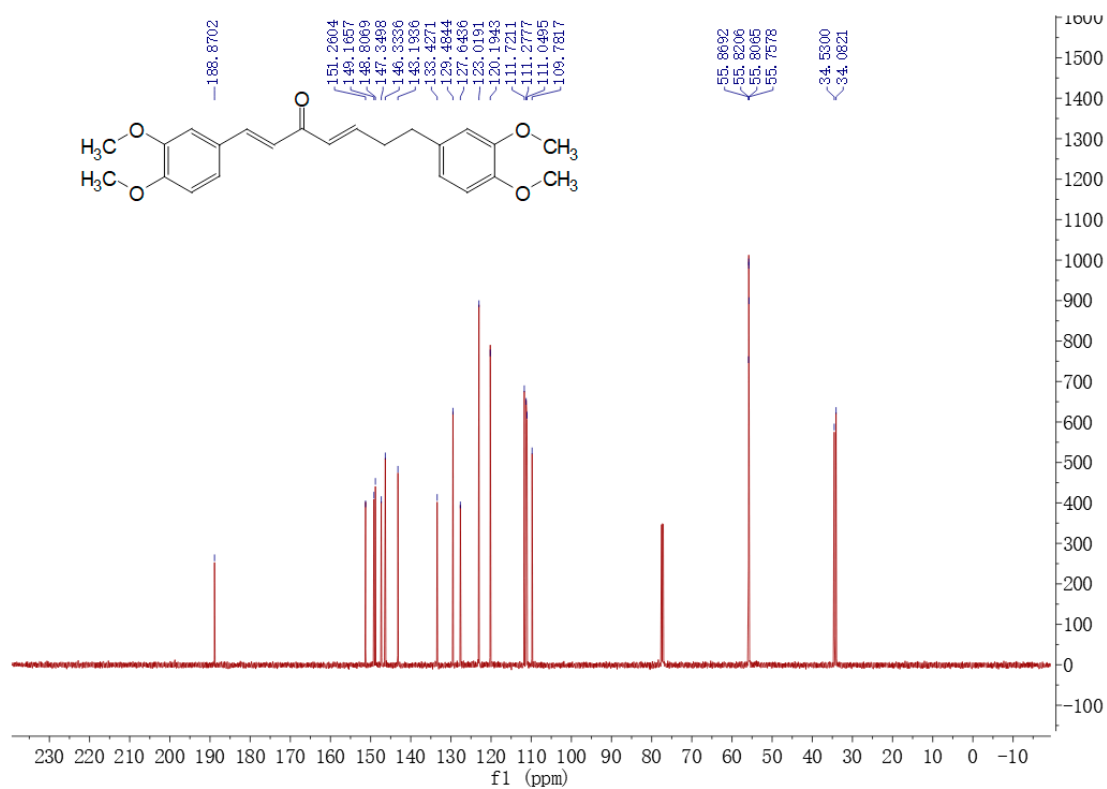

<sup>13</sup>C NMR spectrum of CU-2 (151 MHz, CDCl<sub>3</sub>)

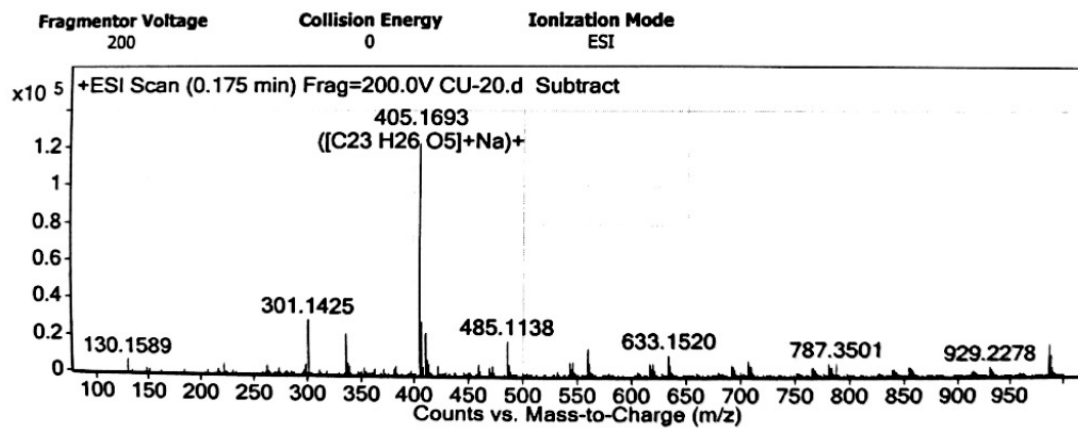

HRMS spectrum of CU-2

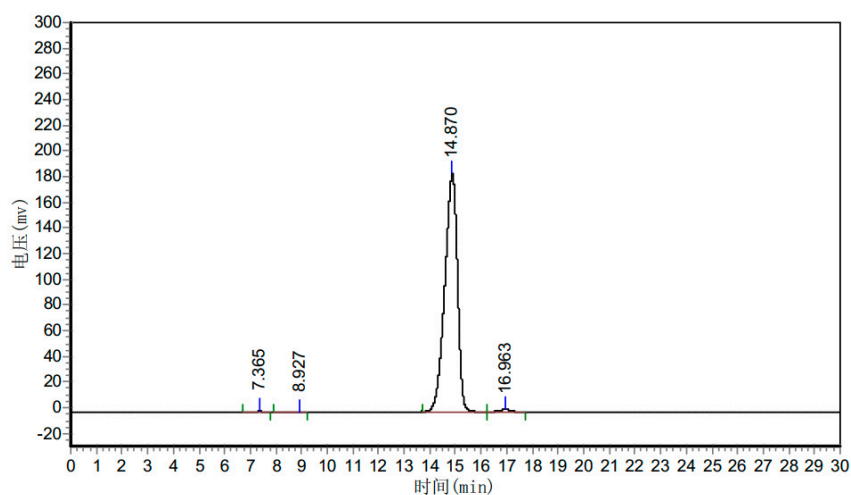

分析结果表

| 峰号 | 峰名 | 保留时间   | 峰高         | 峰面积         | 含量       |
|----|----|--------|------------|-------------|----------|
| 1  |    | 7.365  | 804.965    | 22712.398   | 0.3468   |
| 2  |    | 8.927  | 168.721    | 3926.471    | 0.0600   |
| 3  |    | 14.870 | 186109.031 | 6434450.000 | 98.2499  |
| 4  |    | 16.963 | 2187.258   | 87979.414   | 1.3434   |
| 总计 |    |        | 189269.975 | 6549068.283 | 100.0000 |

The HPLC spectrum of CU-2

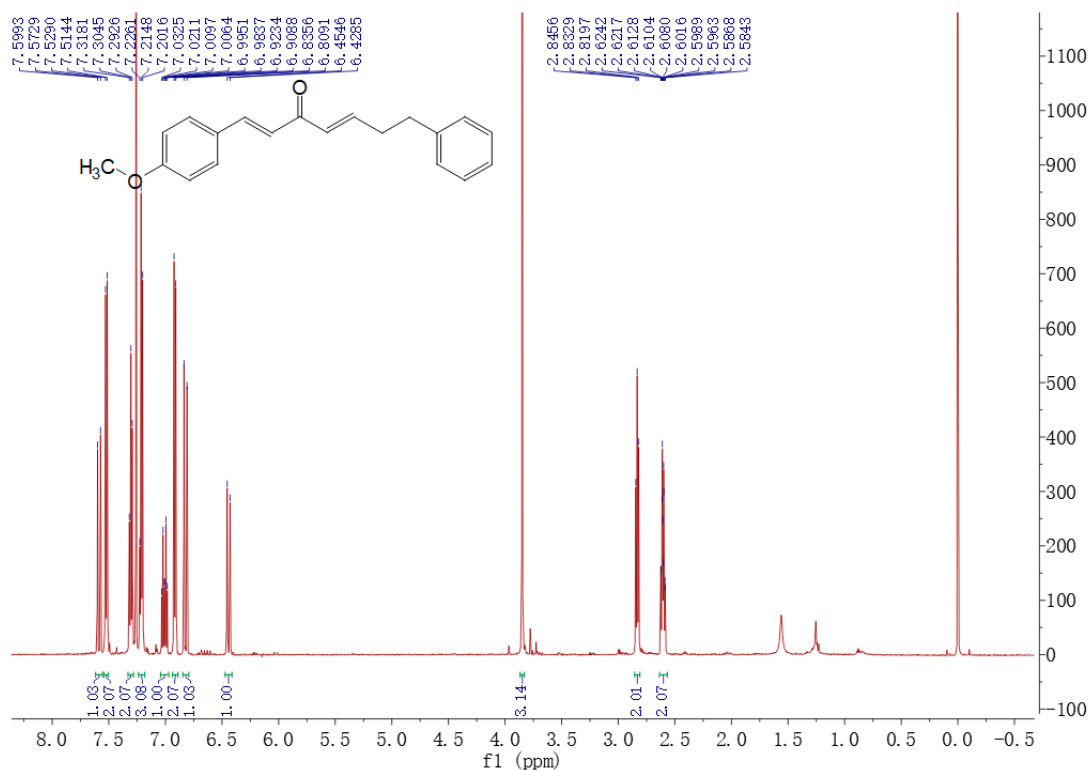

<sup>1</sup>H NMR spectrum of CU-3 (600 MHz, CDCl<sub>3</sub>)

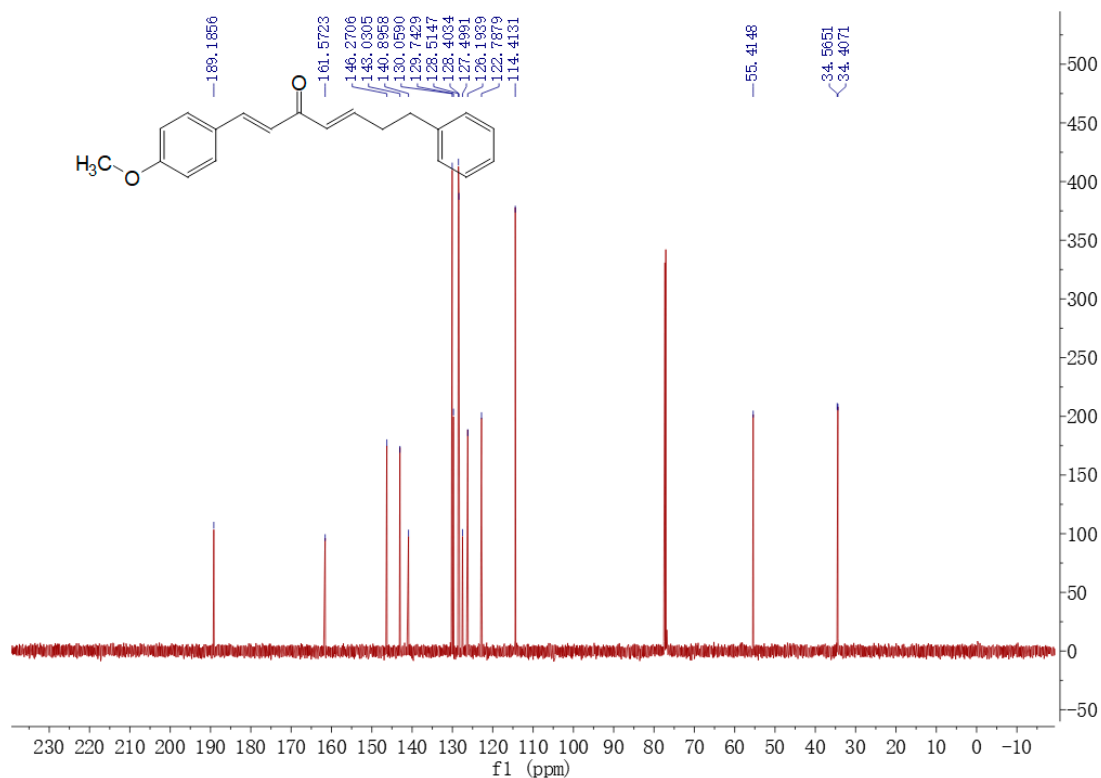

<sup>13</sup>C NMR spectrum of CU-3 (151 MHz, CDCl<sub>3</sub>)

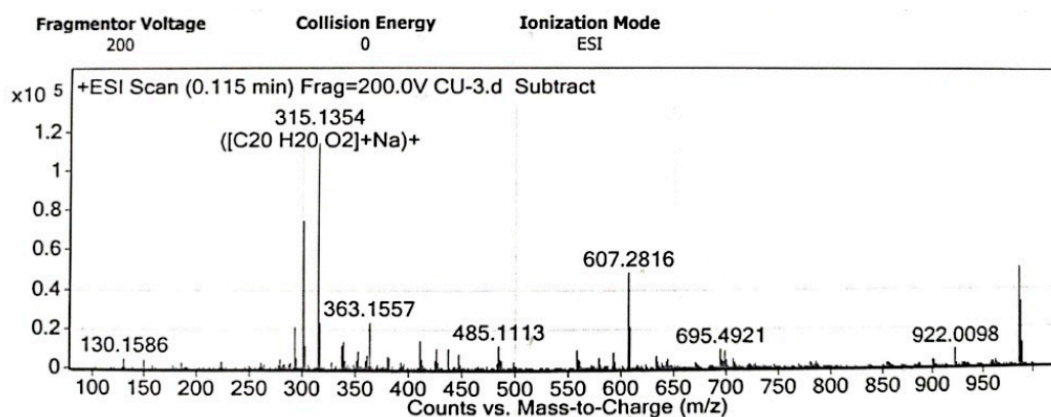

HRMS spectrum of CU-3

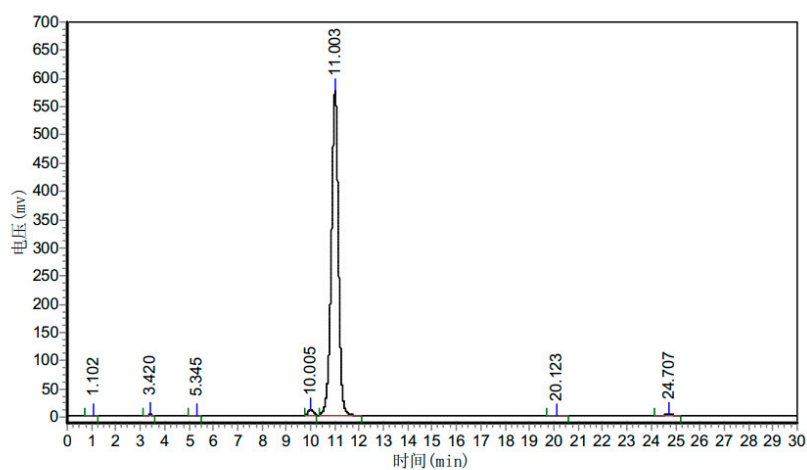

分析结果表

| 峰号 | 峰名 | 保留时间   | 峰高         | 峰面积          | 含量       |
|----|----|--------|------------|--------------|----------|
| 1  |    | 1.102  | 203.081    | 3744.752     | 0.0311   |
| 2  |    | 3.420  | 1888.172   | 20904.396    | 0.1737   |
| 3  |    | 5.345  | 743.343    | 17359.500    | 0.1442   |
| 4  |    | 10.005 | 9726.727   | 388304.169   | 3.2265   |
| 5  |    | 11.003 | 576958.688 | 11518896.067 | 95.7129  |
| 6  |    | 20.123 | 887.903    | 28426.102    | 0.2362   |
| 7  |    | 24.707 | 1559.765   | 57209.051    | 0.4754   |
| 总计 |    |        | 591967.677 | 12034841.769 | 100.0000 |

The HPLC spectrum of CU-3

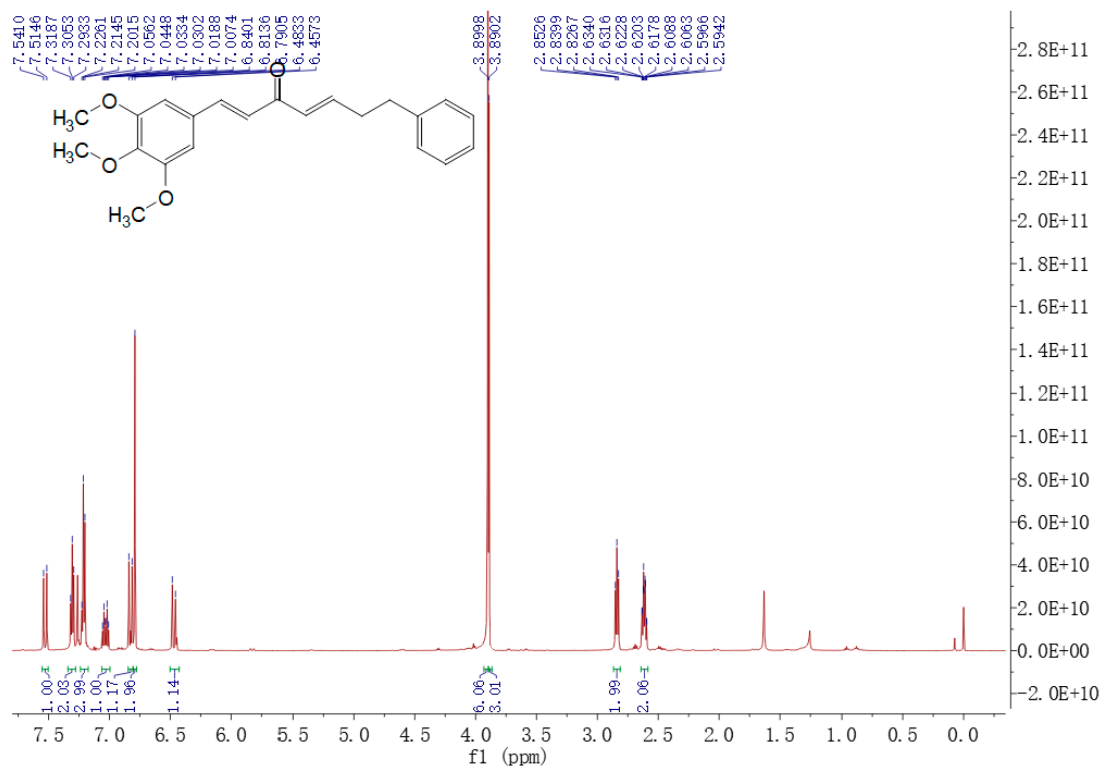

<sup>1</sup>H NMR spectrum of CU-4 (600 MHz, CDCl<sub>3</sub>)

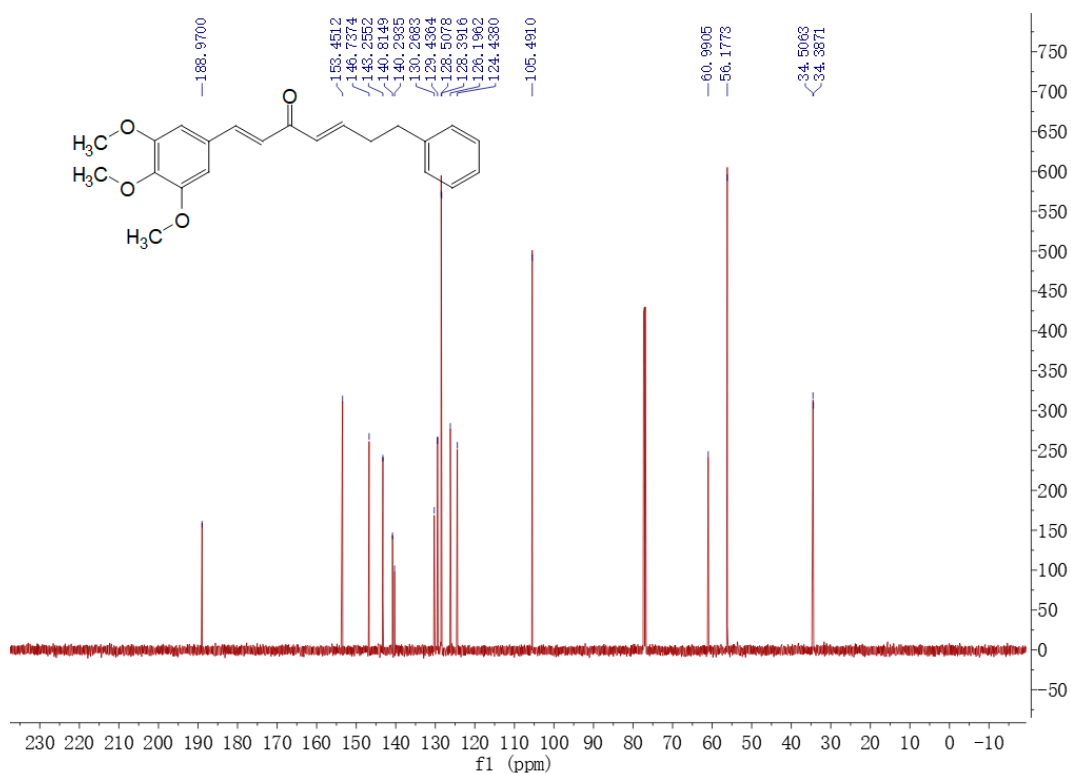

<sup>13</sup>C NMR spectrum of CU-4 (151 MHz, CDCl<sub>3</sub>)



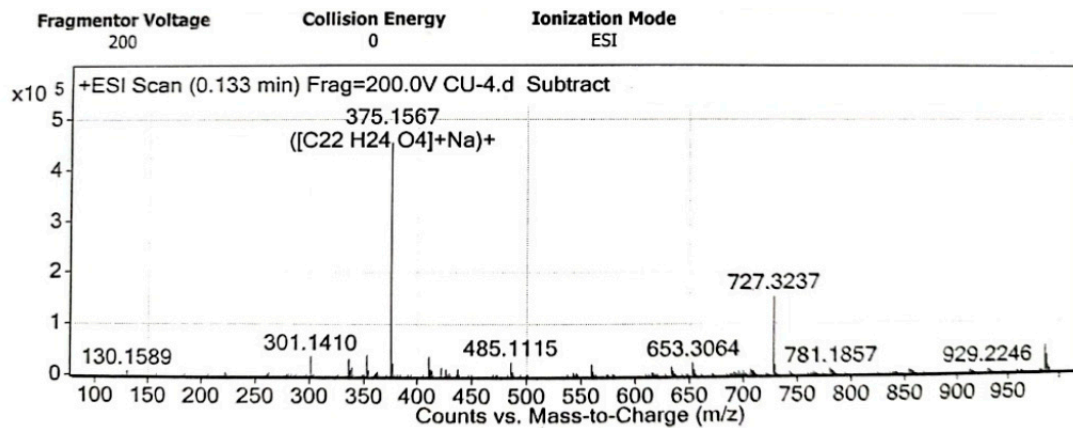

HRMS spectrum of CU-4

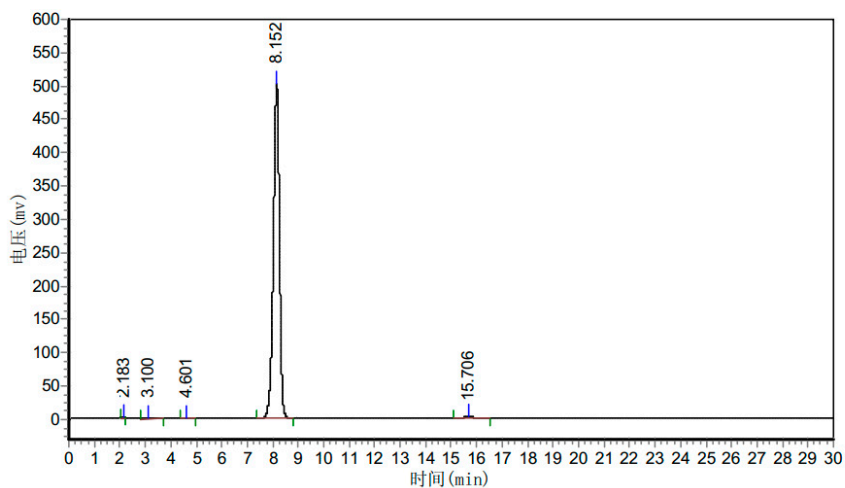

分析结果表

| 峰号 | 峰名 | 保留时间   | 峰高         | 峰面积         | 含量       |
|----|----|--------|------------|-------------|----------|
| 1  |    | 2.183  | 2660.237   | 17210.066   | 0.2034   |
| 2  |    | 3.100  | 1213.497   | 29638.703   | 0.3503   |
| 3  |    | 4.601  | 1762.348   | 16199.650   | 0.1915   |
| 4  |    | 8.152  | 501713.938 | 8296078.500 | 98.0636  |
| 5  |    | 15.706 | 2893.486   | 100767.570  | 1.1911   |
| 总计 |    |        | 510243.505 | 8459894.490 | 100.0000 |

The HPLC spectrum of CU-4

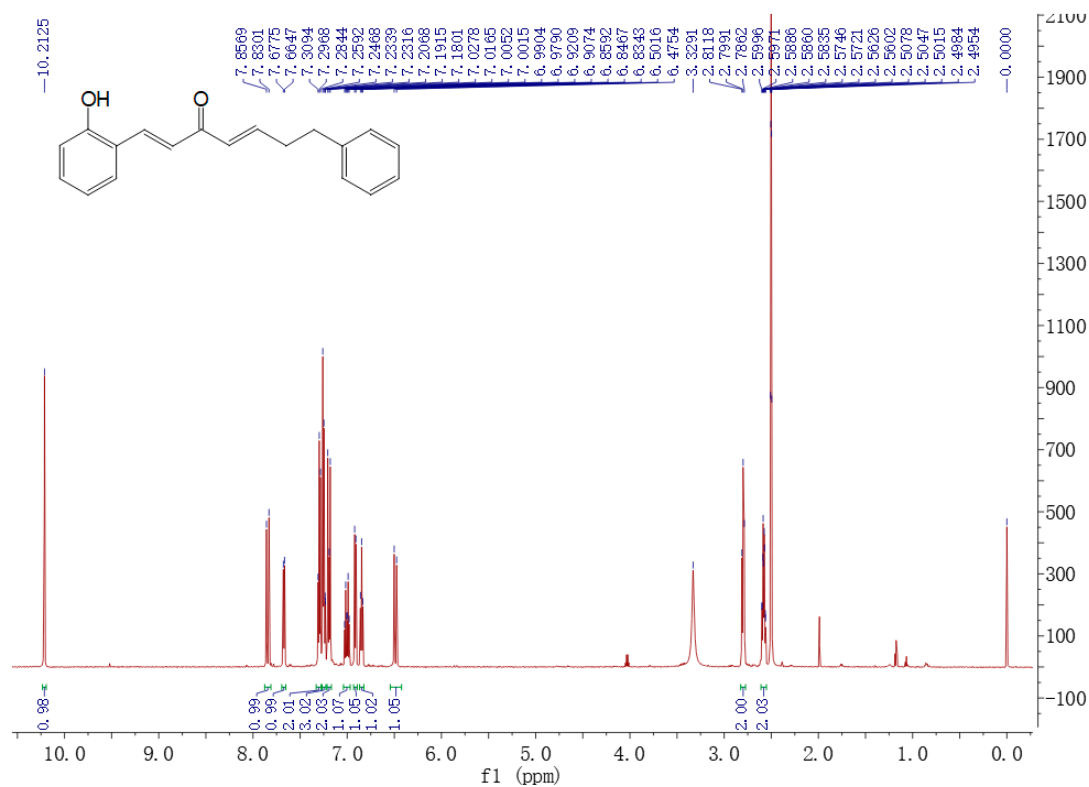

<sup>1</sup>H NMR spectrum of CU-5 (600 MHz, DMSO-*d*<sub>6</sub>)

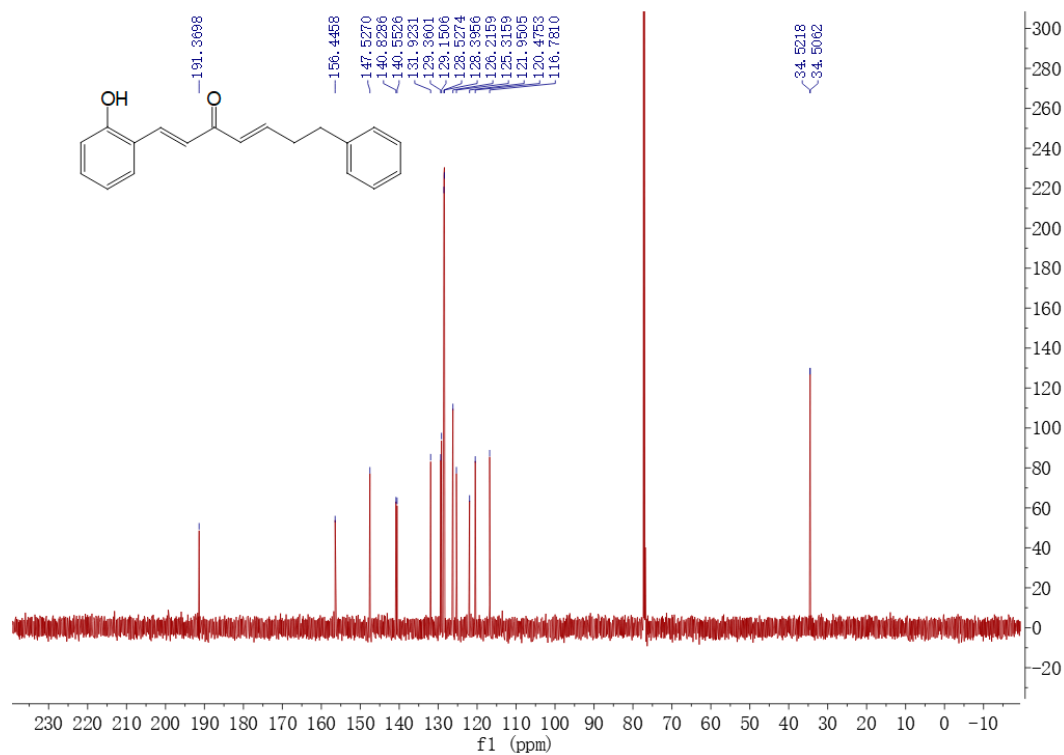

<sup>13</sup>C NMR spectrum of CU-5 (151 MHz, CDCl<sub>3</sub>)

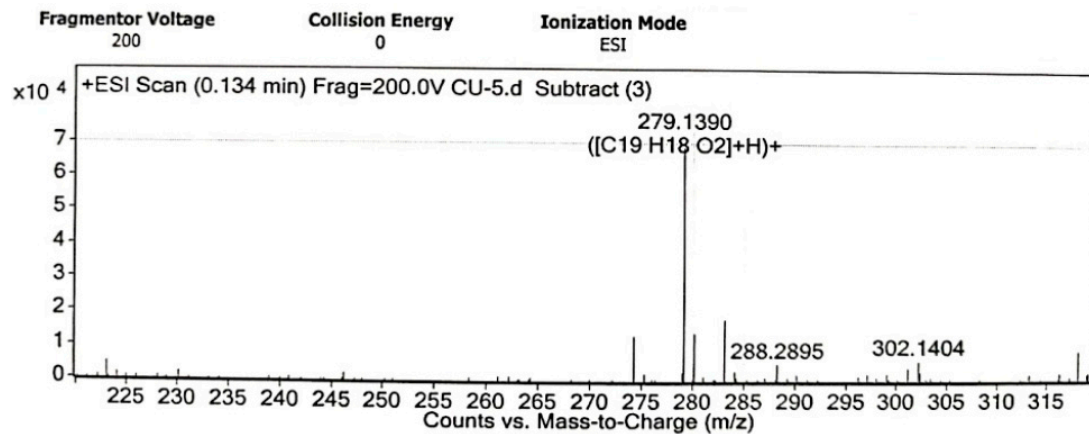

HRMS spectrum of CU-5

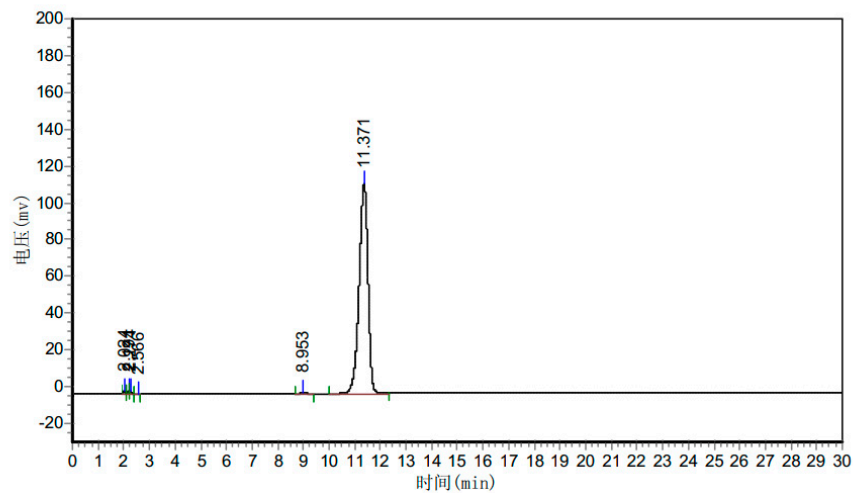

分析结果表

| 峰号 | 峰名 | 保留时间   | 峰高         | 峰面积         | 含量       |
|----|----|--------|------------|-------------|----------|
| 1  |    | 2.024  | 1564.333   | 13489.207   | 0.4843   |
| 2  |    | 2.191  | 2114.852   | 12113.872   | 0.4349   |
| 3  |    | 2.274  | 1850.111   | 10287.735   | 0.3693   |
| 4  |    | 2.566  | 470.276    | 4738.137    | 0.1701   |
| 5  |    | 8.953  | 98.844     | 2490.900    | 0.0894   |
| 6  |    | 11.371 | 113559.117 | 2742349.000 | 98.4520  |
| 总计 |    |        | 119657.534 | 2785468.851 | 100.0000 |

The HPLC spectrum of CU-5

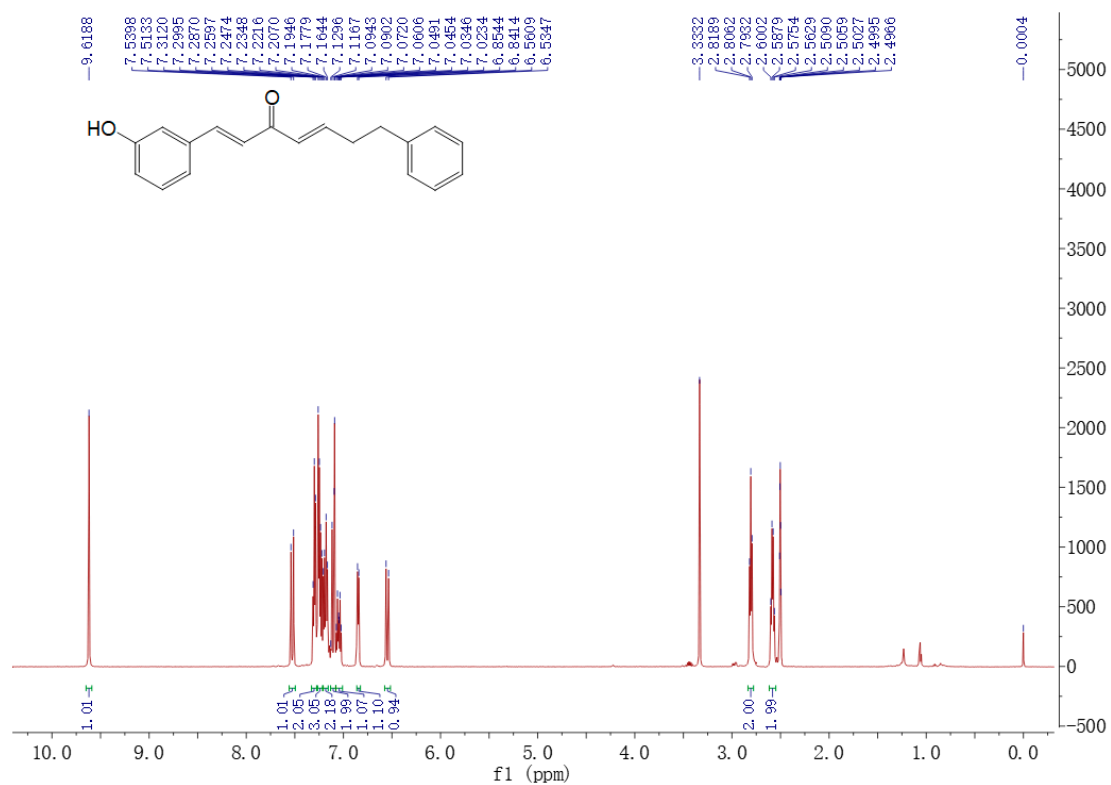

<sup>1</sup>H NMR spectrum of CU-6 (600 MHz, DMSO-*d*<sub>6</sub>)

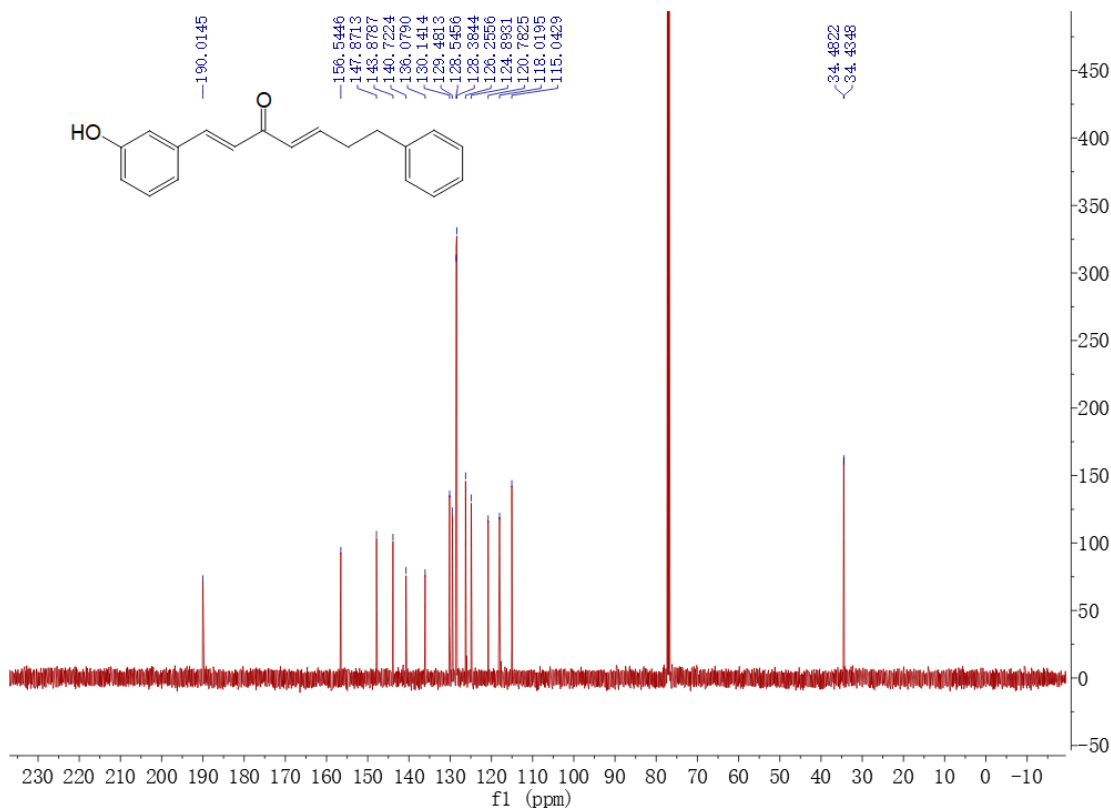

<sup>13</sup>C NMR spectrum of CU-6 (151 MHz, CDCl<sub>3</sub>)

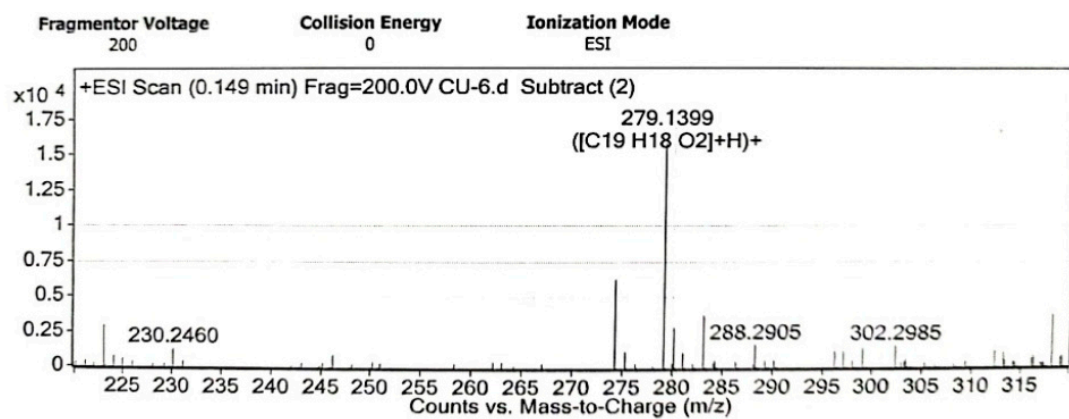

HRMS spectrum of CU-6

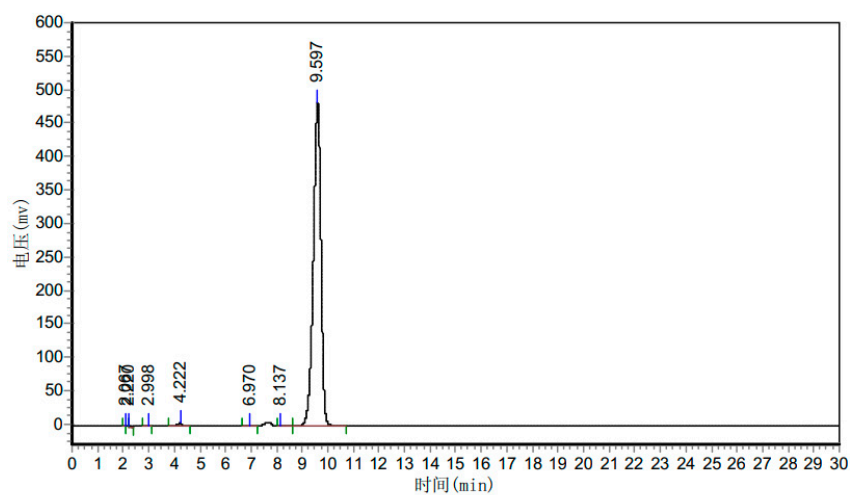

分析结果表

| 峰号 | 峰名 | 保留时间  | 峰高         | 峰面积          | 含量       |
|----|----|-------|------------|--------------|----------|
| 1  |    | 2.067 | 1474.099   | 9773.155     | 0.0955   |
| 2  |    | 2.220 | 2127.150   | 14409.883    | 0.1408   |
| 3  |    | 2.998 | 995.628    | 13624.840    | 0.1332   |
| 4  |    | 4.222 | 4162.896   | 63434.148    | 0.6200   |
| 5  |    | 6.970 | 1579.448   | 35169.191    | 0.3437   |
| 6  |    | 8.137 | 164.289    | 3126.660     | 0.0306   |
| 7  |    | 9.597 | 484405.719 | 10091741.000 | 98.6362  |
| 总计 |    |       | 494909.230 | 10231278.878 | 100.0000 |

The HPLC spectrum of CU-6

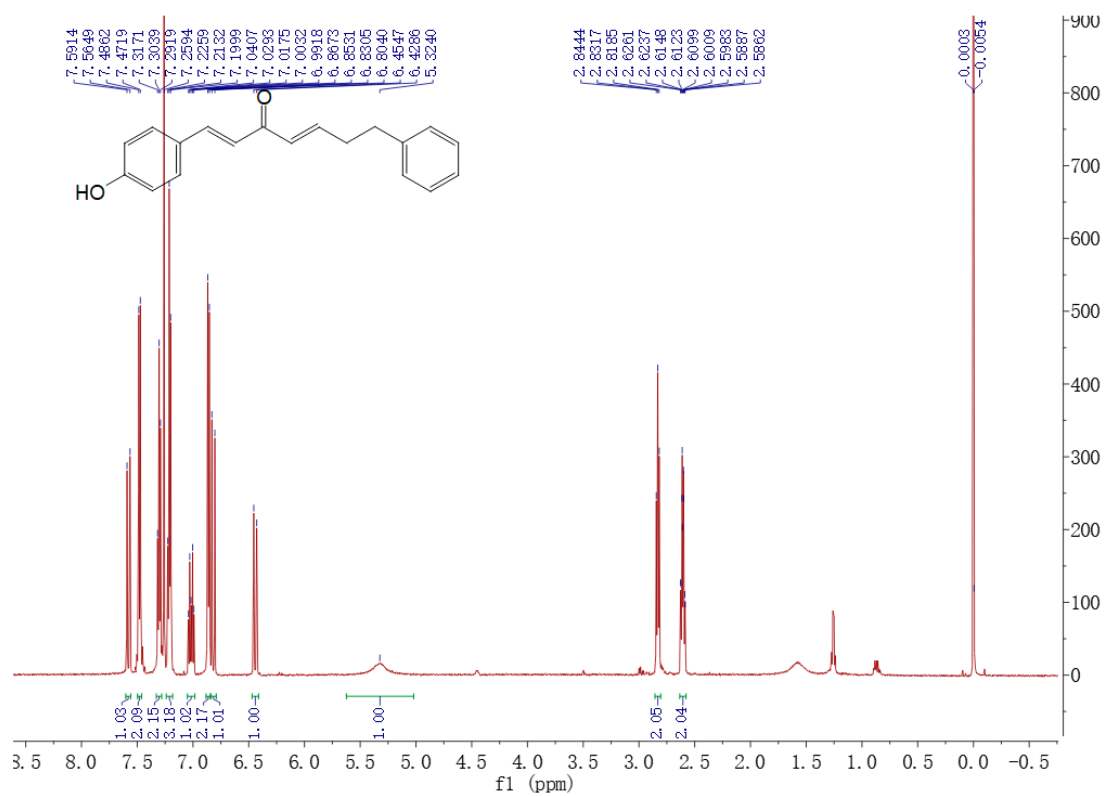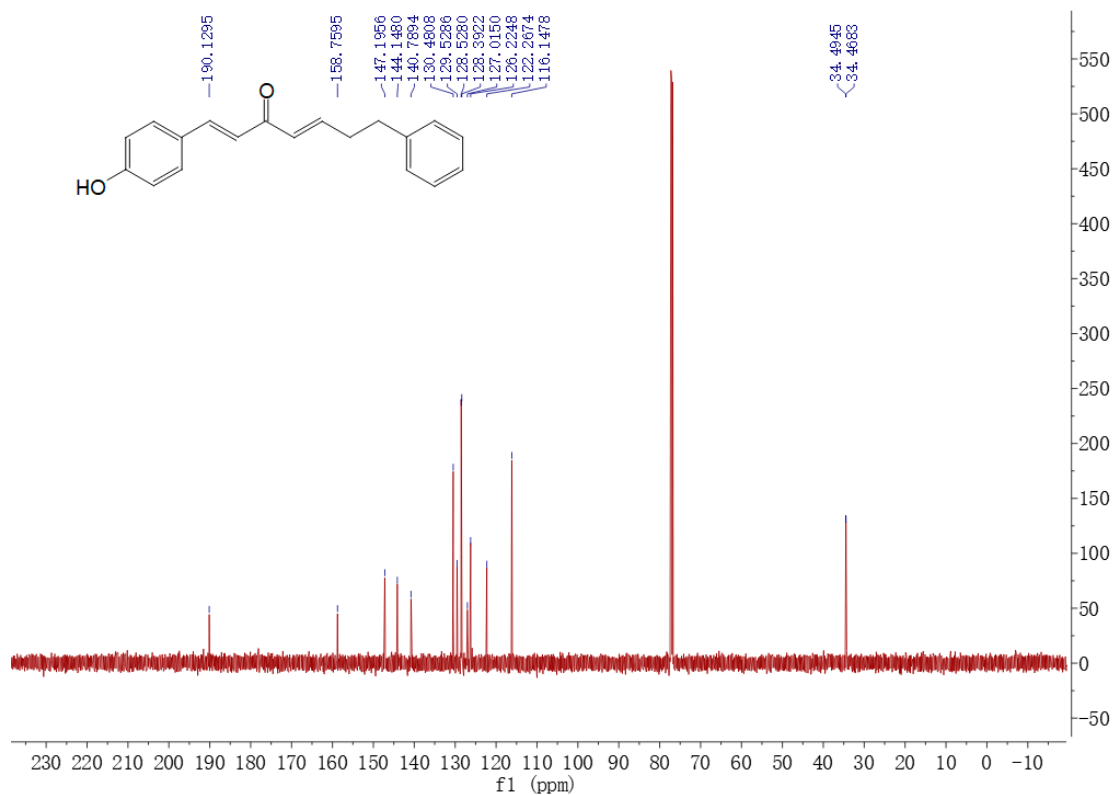

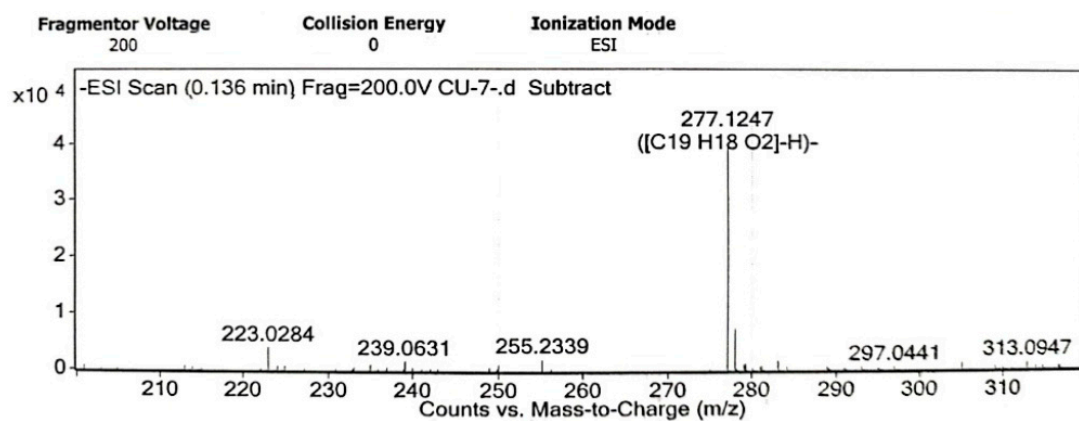

HRMS spectrum of CU-7

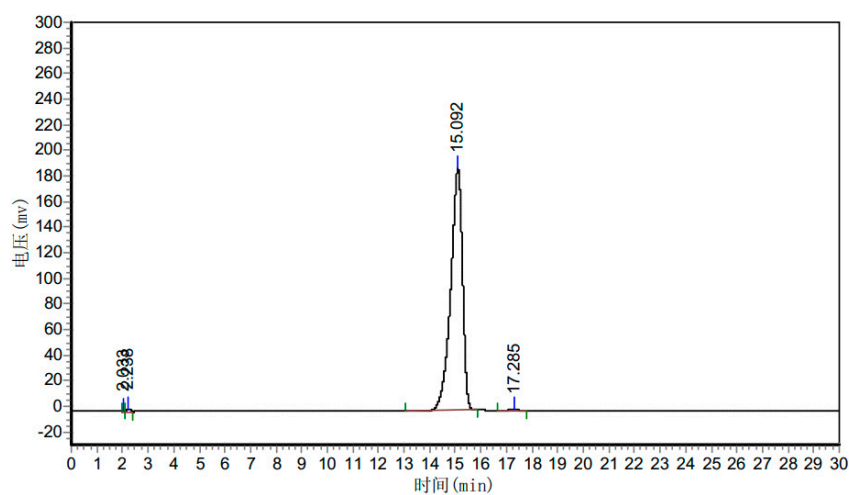

分析结果表

| 峰号 | 峰名 | 保留时间   | 峰高         | 峰面积         | 含量       |
|----|----|--------|------------|-------------|----------|
| 1  |    | 2.033  | 1032.042   | 7517.198    | 0.1233   |
| 2  |    | 2.238  | 2266.143   | 22497.465   | 0.3690   |
| 3  |    | 15.092 | 188682.109 | 6035332.000 | 98.9917  |
| 4  |    | 17.285 | 1016.723   | 31461.752   | 0.5160   |
| 总计 |    |        | 192997.017 | 6096808.415 | 100.0000 |

The HPLC spectrum of CU-7

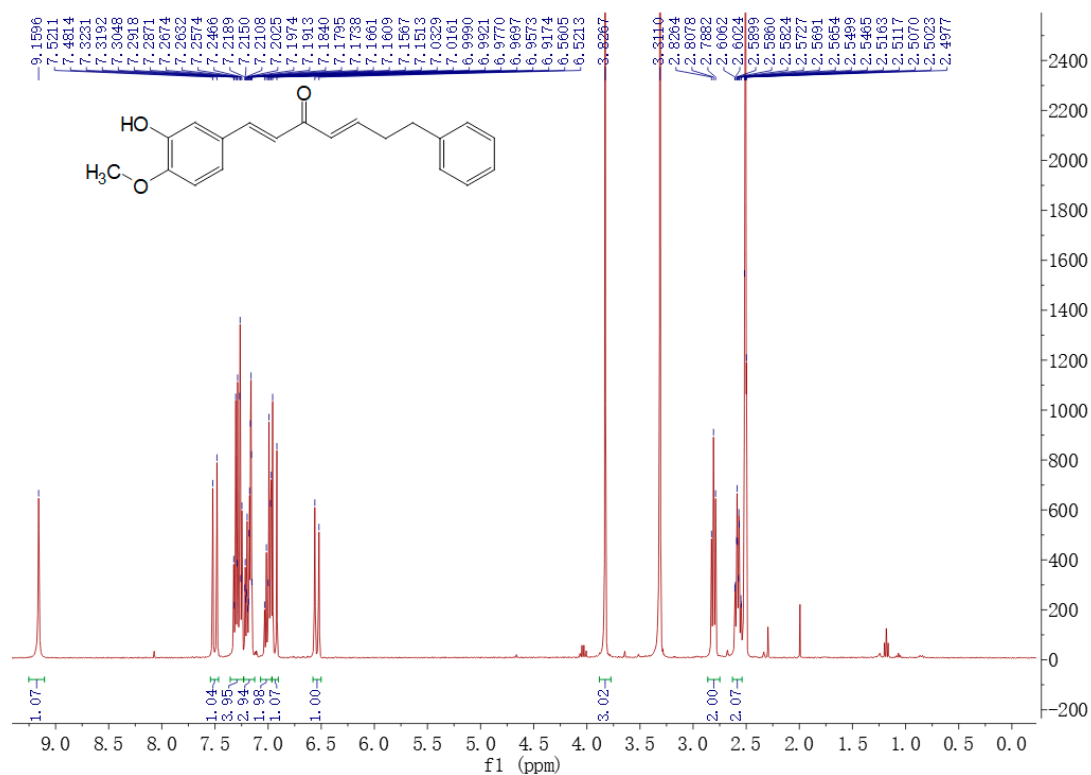

<sup>1</sup>H NMR spectrum of CU-8 (600 MHz, DMSO-*d*<sub>6</sub>)

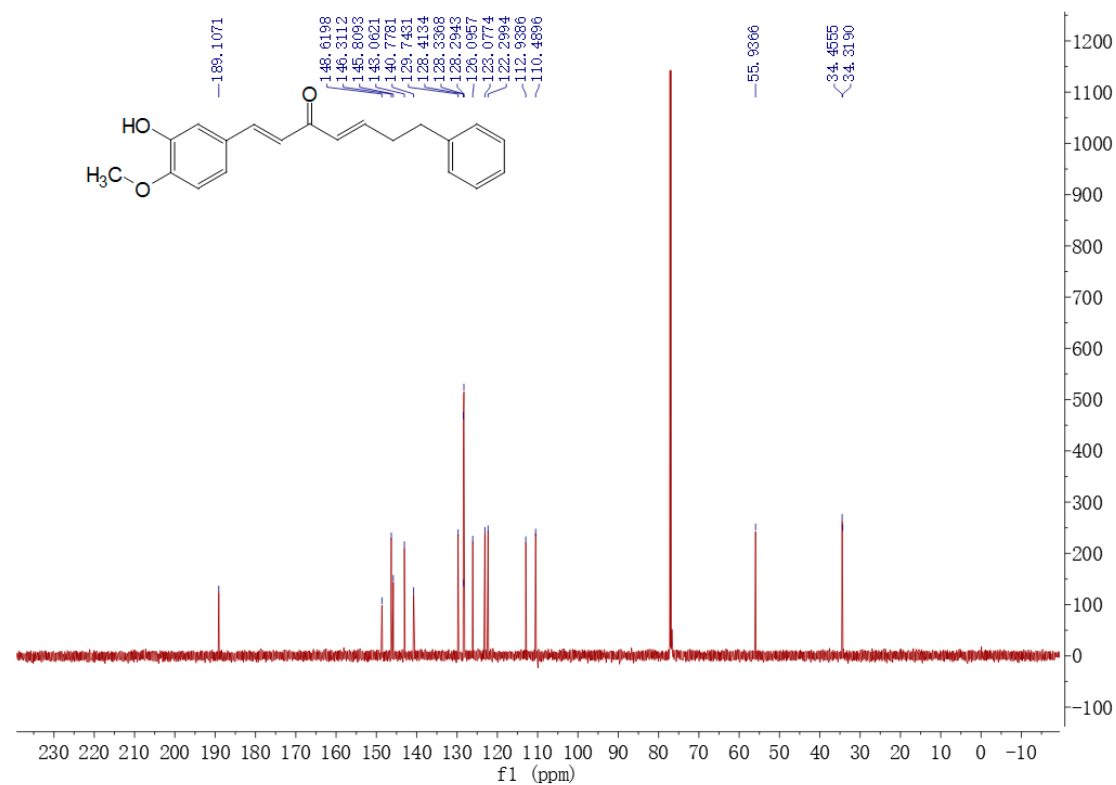

<sup>13</sup>C NMR spectrum of CU-8 (151 MHz, CDCl<sub>3</sub>)



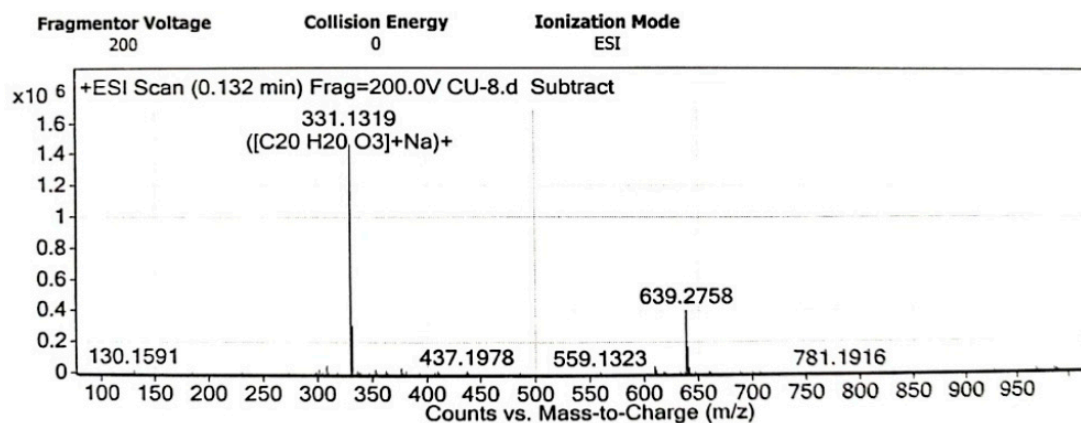

HRMS spectrum of **CU-8**

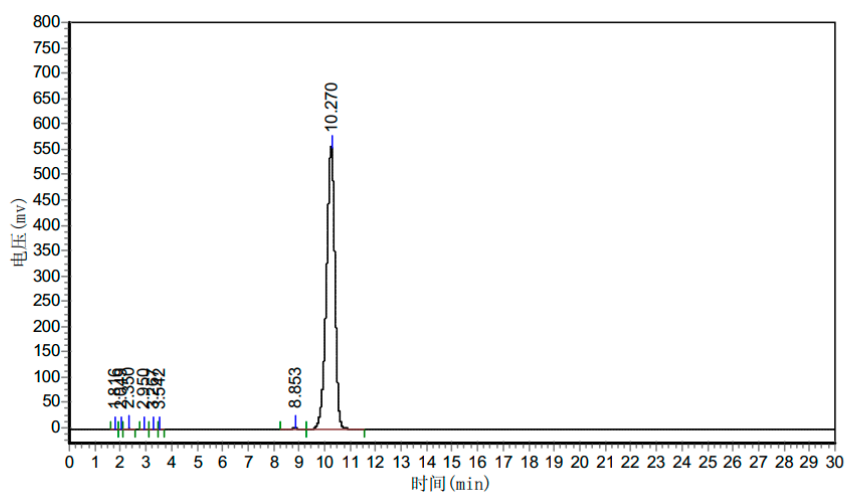

分析结果表

| 峰号 | 峰名 | 保留时间   | 峰高         | 峰面积          | 含量       |
|----|----|--------|------------|--------------|----------|
| 1  |    | 1.816  | 339.918    | 3014.010     | 0.0230   |
| 2  |    | 2.049  | 764.809    | 7876.200     | 0.0601   |
| 3  |    | 2.350  | 2492.955   | 37321.590    | 0.2847   |
| 4  |    | 2.950  | 1461.650   | 17055.998    | 0.1301   |
| 5  |    | 3.267  | 1782.750   | 19170.498    | 0.1462   |
| 6  |    | 3.542  | 468.100    | 4163.962     | 0.0318   |
| 7  |    | 8.853  | 2412.613   | 51192.156    | 0.3905   |
| 8  |    | 10.270 | 558719.438 | 12968676.000 | 98.9336  |
| 总计 |    |        | 568442.233 | 13108470.414 | 100.0000 |

The HPLC spectrum of **CU-8**

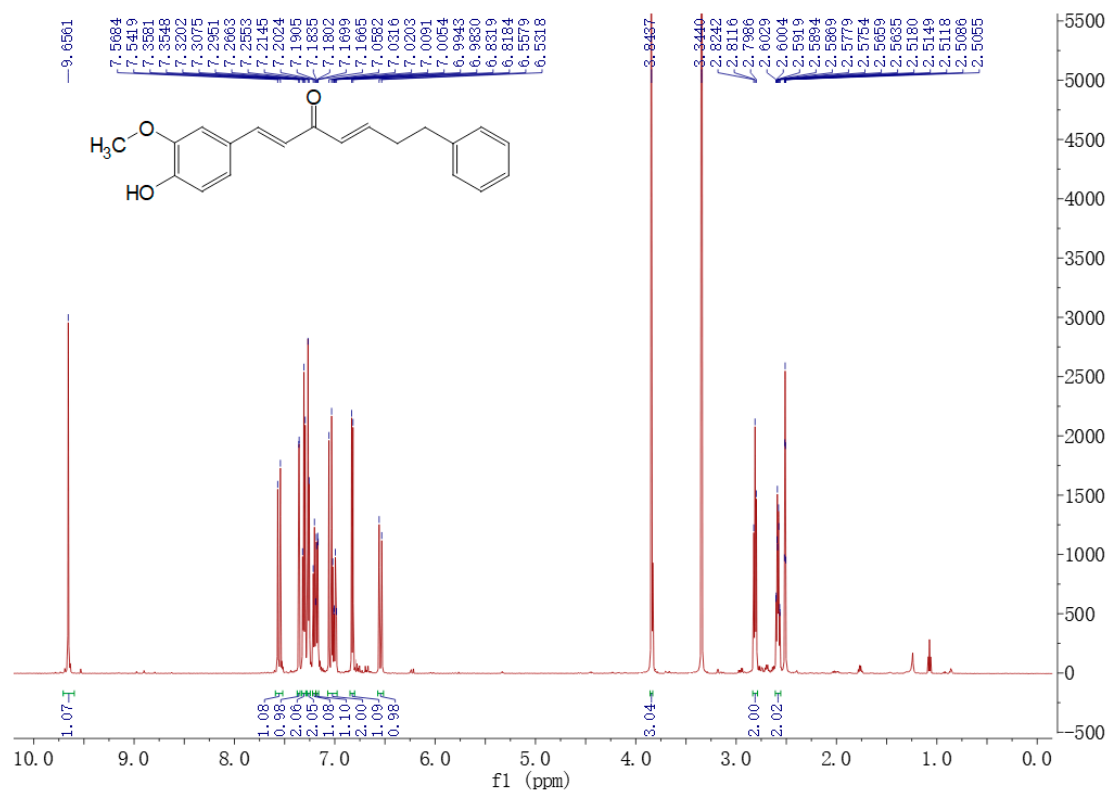

<sup>1</sup>H NMR spectrum of CU-9 (600 MHz, DMSO-*d*<sub>6</sub>)

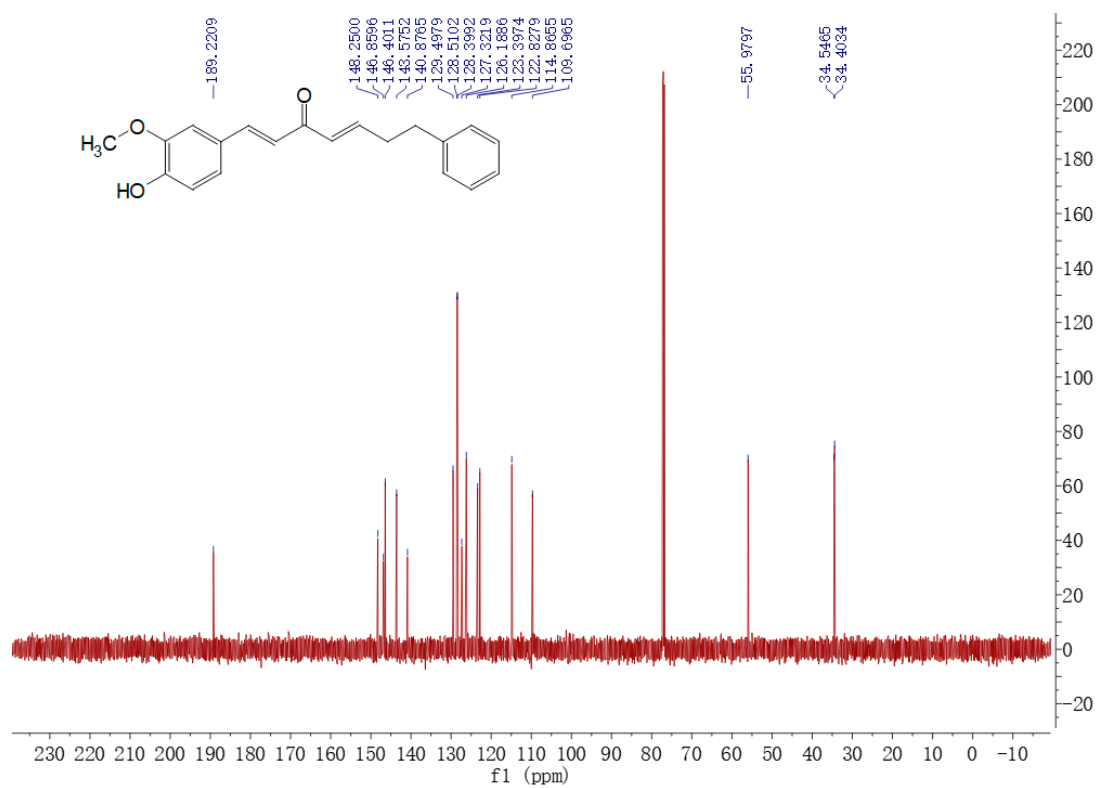

<sup>13</sup>C NMR spectrum of CU-9 (151 MHz, CDCl<sub>3</sub>)

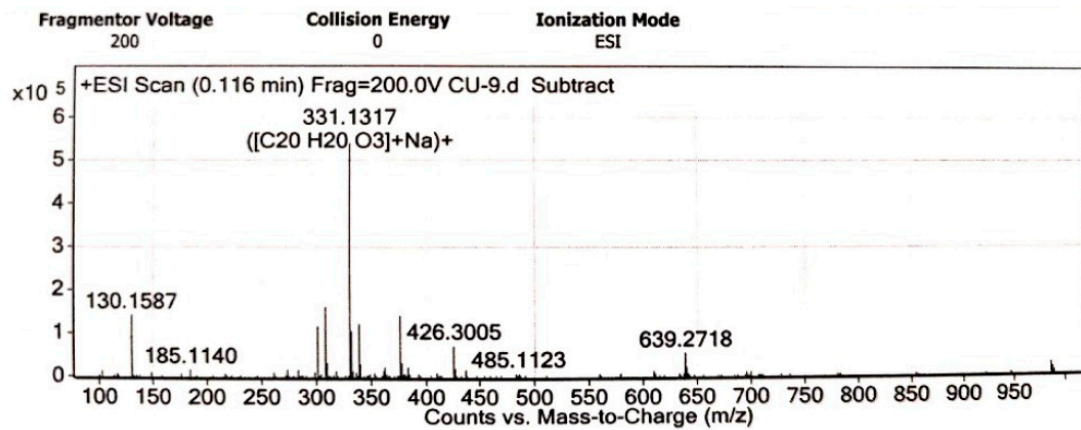

HRMS spectrum of CU-9

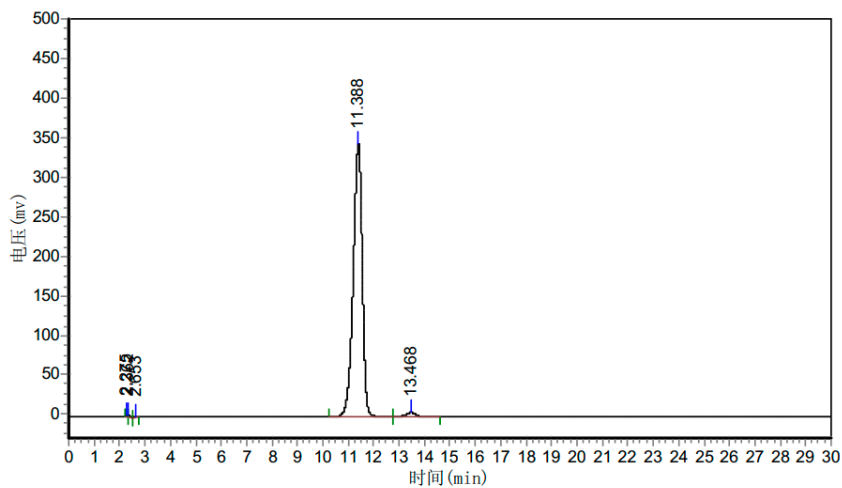

分析结果表

| 峰号 | 峰名 | 保留时间   | 峰高         | 峰面积         | 含量       |
|----|----|--------|------------|-------------|----------|
| 1  |    | 2.275  | 2056.899   | 11685.270   | 0.1324   |
| 2  |    | 2.362  | 2077.719   | 13154.101   | 0.1491   |
| 3  |    | 2.653  | 275.952    | 3085.696    | 0.0350   |
| 4  |    | 11.388 | 346223.375 | 8529178.541 | 96.6559  |
| 5  |    | 13.468 | 5794.259   | 267172.453  | 3.0277   |
| 总计 |    |        | 356428.204 | 8824270.988 | 100.0000 |

The HPLC spectrum of CU-9

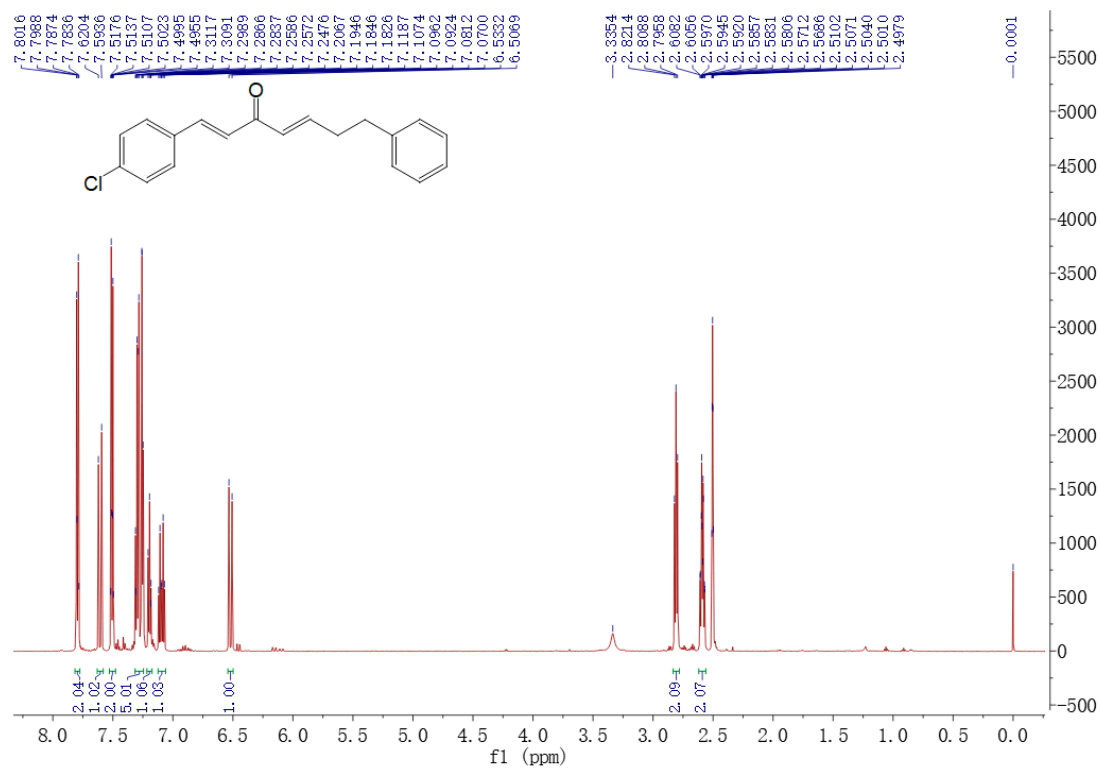

**<sup>1</sup>H NMR spectrum of CU-10 (600 MHz, CDCl<sub>3</sub>)**

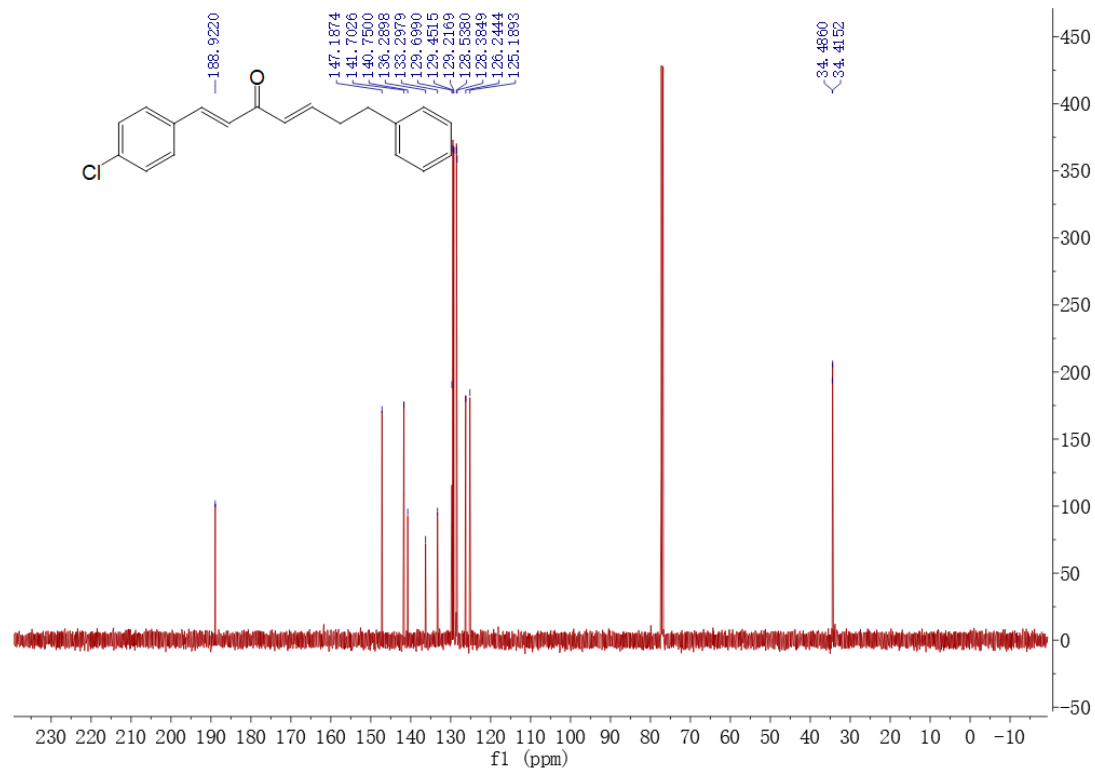

**<sup>13</sup>C NMR spectrum of CU-10 (151 MHz, CDCl<sub>3</sub>)**

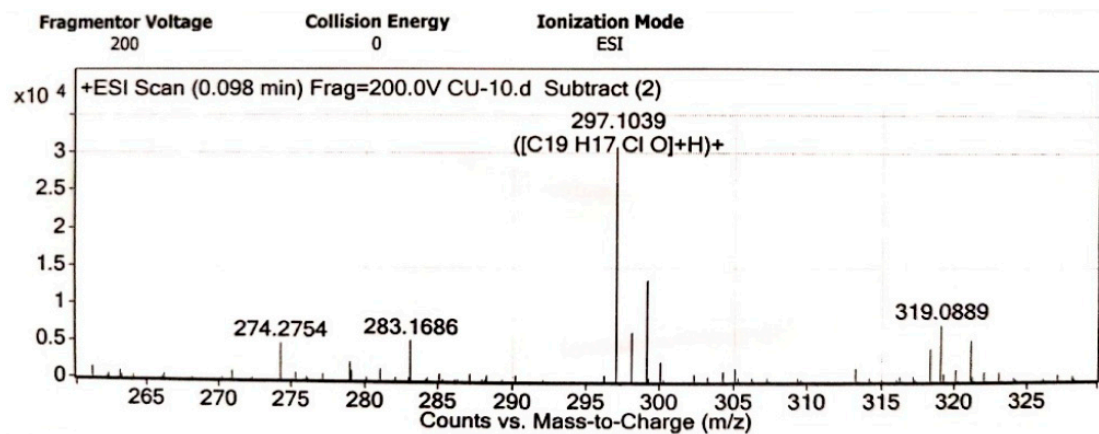

HRMS spectrum of CU-10

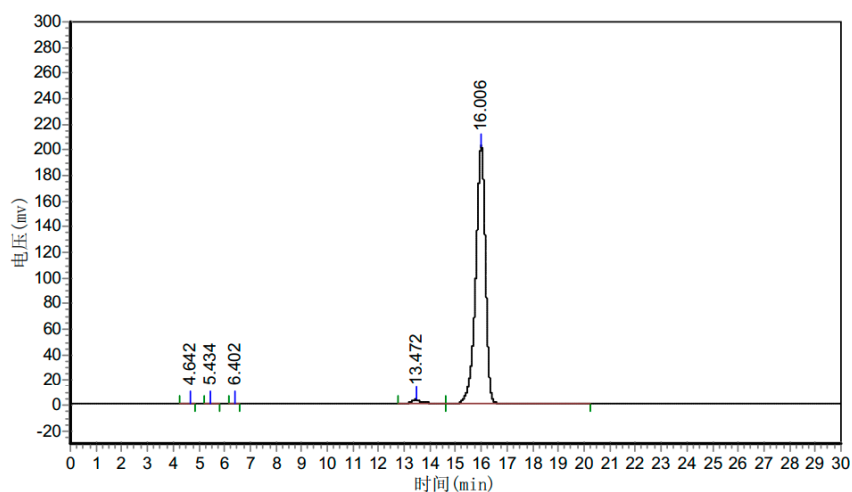

分析结果表

| 峰号 | 峰名 | 保留时间   | 峰高         | 峰面积         | 含量       |
|----|----|--------|------------|-------------|----------|
| 1  |    | 4.642  | 516.206    | 4868.100    | 0.0892   |
| 2  |    | 5.434  | 180.751    | 3799.228    | 0.0696   |
| 3  |    | 6.402  | 183.043    | 2623.213    | 0.0481   |
| 4  |    | 13.472 | 3398.400   | 209226.116  | 3.8332   |
| 5  |    | 16.006 | 202235.281 | 5237748.636 | 95.9600  |
| 总计 |    |        | 206513.681 | 5458262.439 | 100.0000 |

The HPLC spectrum of CU-10

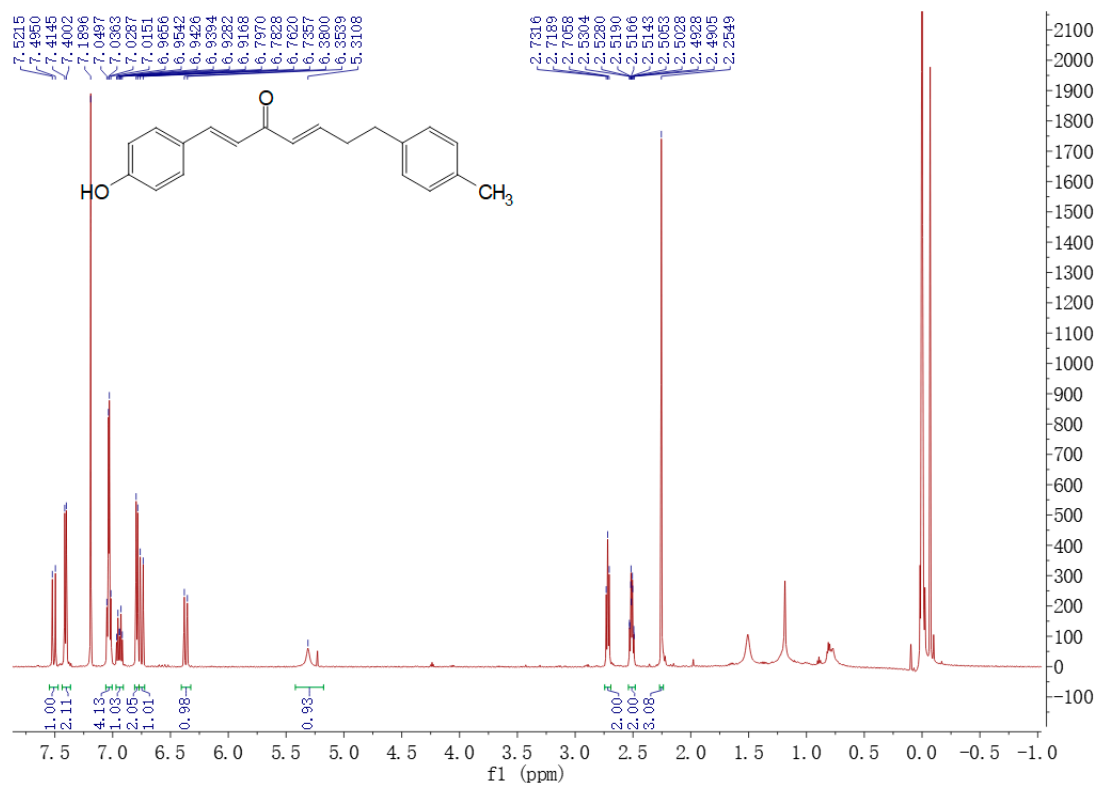

<sup>1</sup>H NMR spectrum of CU-11 (600 MHz, CDCl<sub>3</sub>)

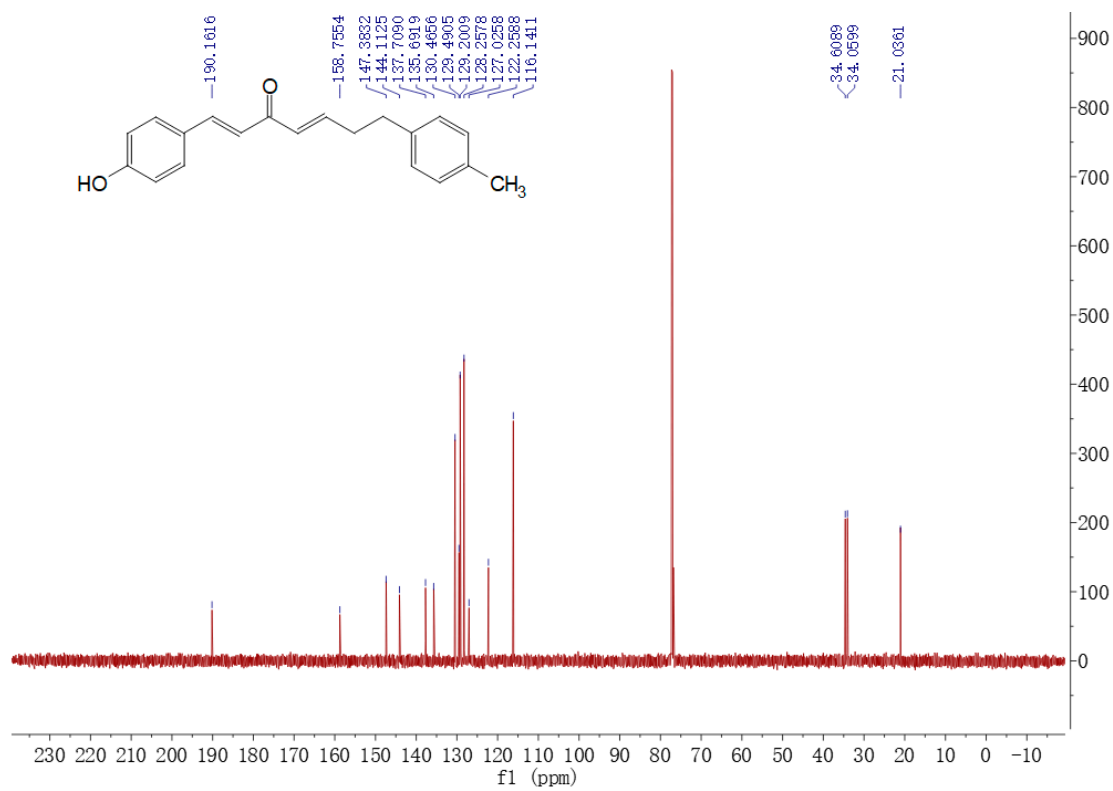

<sup>13</sup>C NMR spectrum of CU-11 (151 MHz, CDCl<sub>3</sub>)

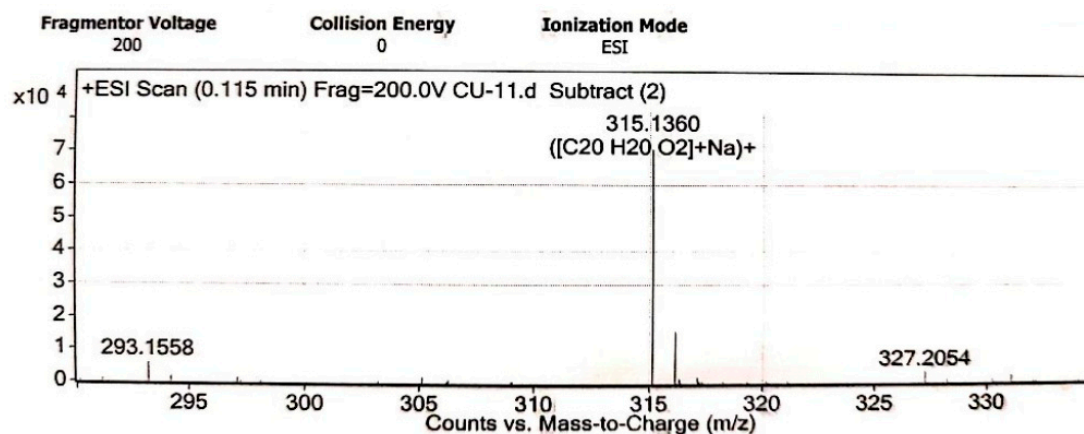

HRMS spectrum of CU-11

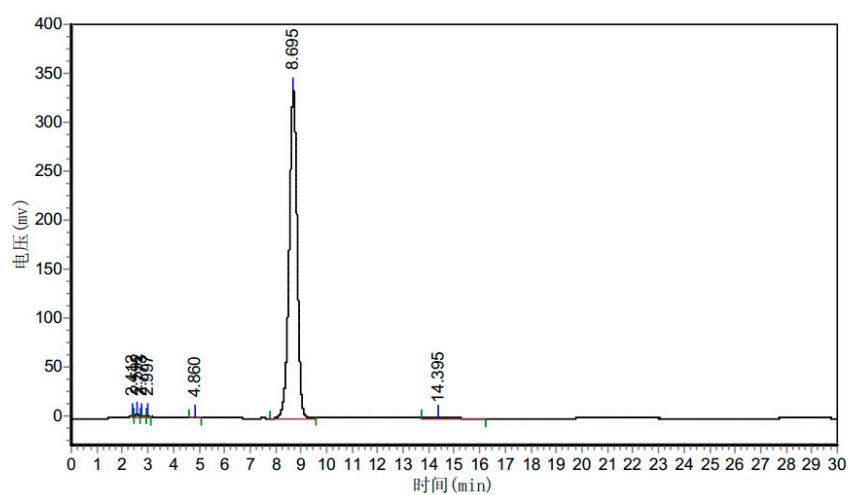

分析结果表

| 峰号 | 峰名 | 保留时间   | 峰高         | 峰面积         | 含量       |
|----|----|--------|------------|-------------|----------|
| 1  |    | 2.412  | 1550.516   | 6832.275    | 0.0918   |
| 2  |    | 2.592  | 3946.372   | 40699.668   | 0.5470   |
| 3  |    | 2.773  | 1628.229   | 18528.340   | 0.2490   |
| 4  |    | 2.997  | 1707.006   | 16397.791   | 0.2204   |
| 5  |    | 4.860  | 796.488    | 8666.198    | 0.1165   |
| 6  |    | 8.695  | 336252.594 | 7283180.500 | 97.8804  |
| 7  |    | 14.395 | 1547.064   | 66590.031   | 0.8949   |
| 总计 |    |        | 347428.269 | 7440894.803 | 100.0000 |

The HPLC spectrum of CU-11

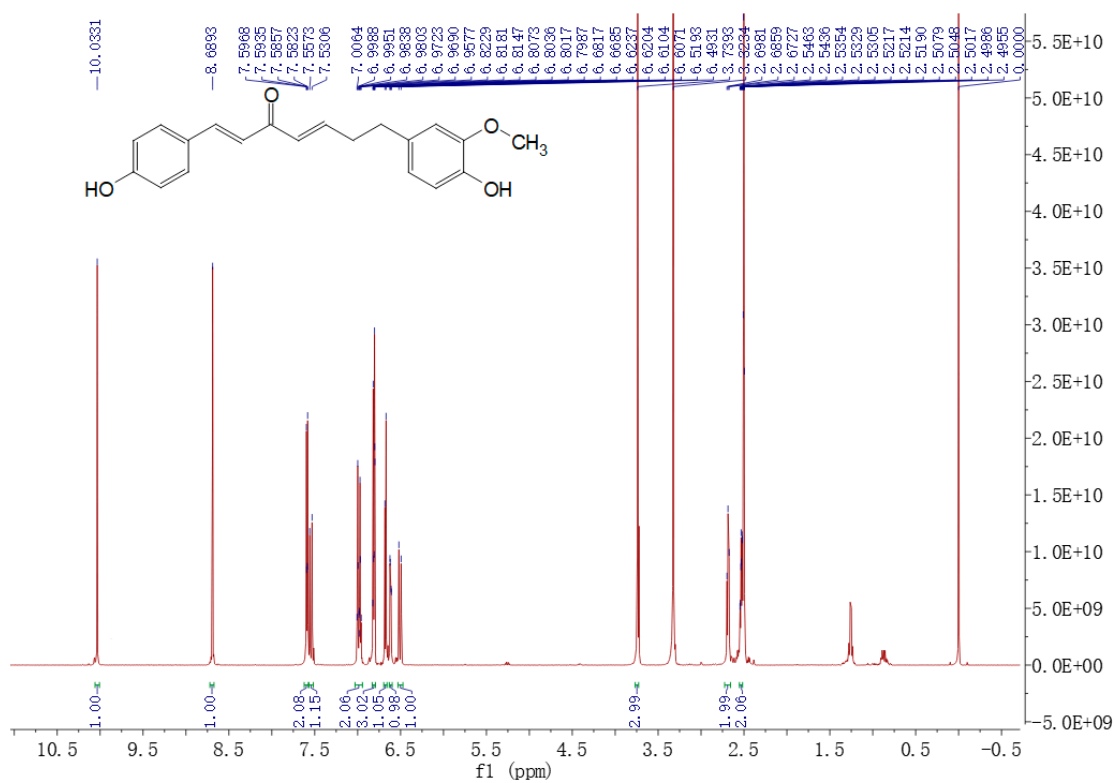

<sup>1</sup>H NMR spectrum of CU-12 (600 MHz, DMSO-*d*<sub>6</sub>)

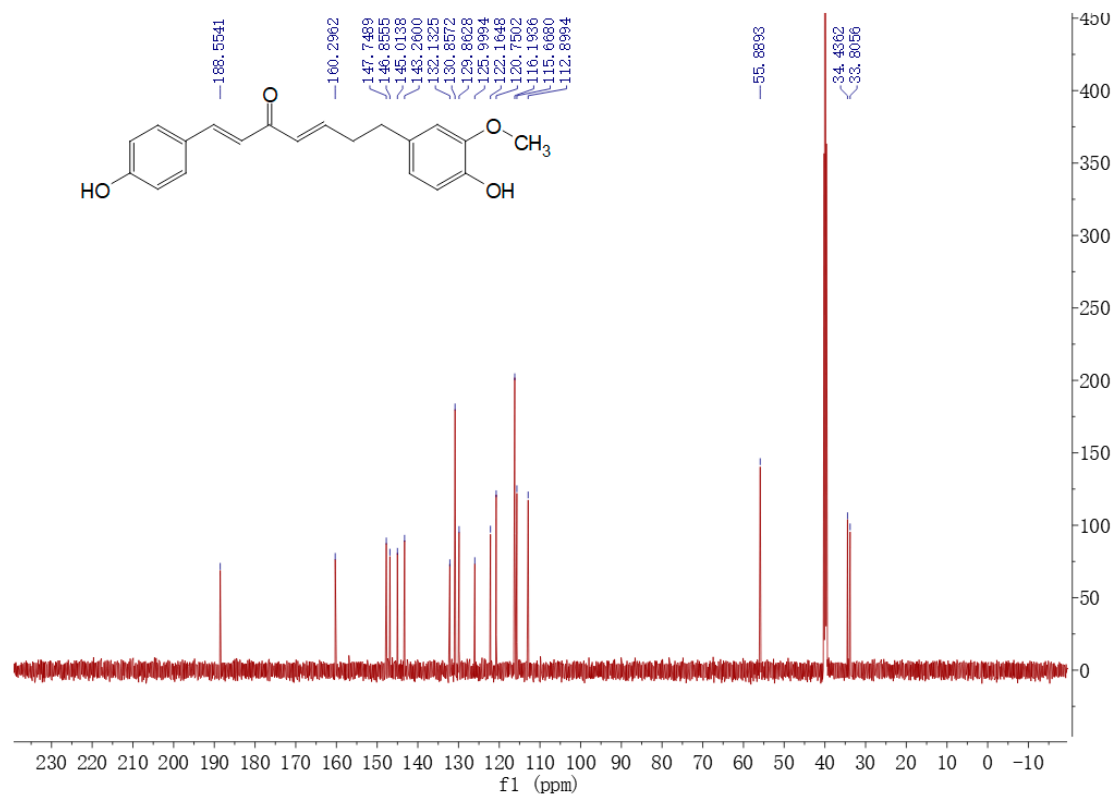

<sup>13</sup>C NMR spectrum of CU-12 (151 MHz, DMSO-*d*<sub>6</sub>)



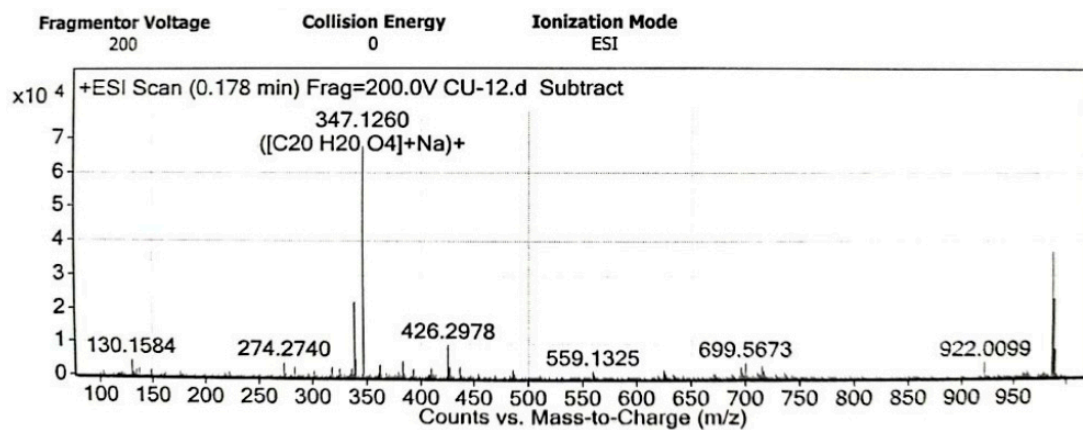

HRMS spectrum of CU-12

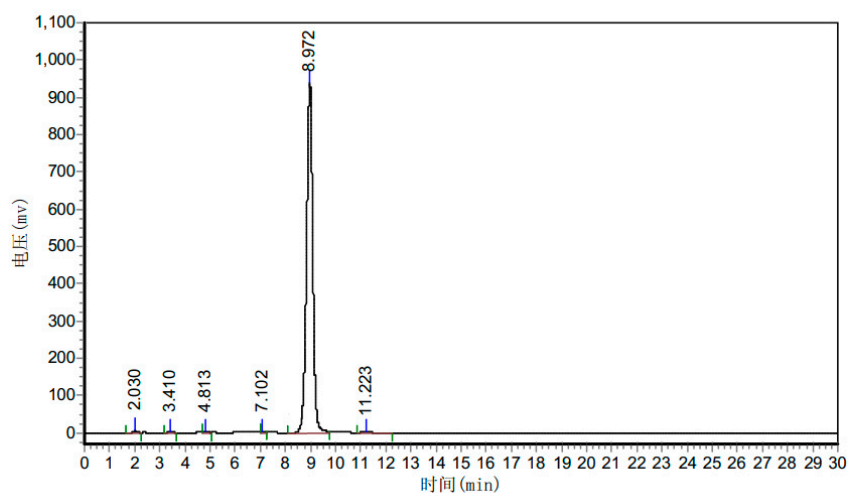

分析结果表

| 峰号 | 峰名 | 保留时间   | 峰高         | 峰面积          | 含量       |
|----|----|--------|------------|--------------|----------|
| 1  |    | 2.030  | 5665.422   | 64132.012    | 0.3910   |
| 2  |    | 3.410  | 3126.135   | 39040.695    | 0.2380   |
| 3  |    | 4.813  | 1458.074   | 18318.861    | 0.1117   |
| 4  |    | 7.102  | 2830.337   | 41172.398    | 0.2510   |
| 5  |    | 8.972  | 939980.563 | 16199390.000 | 98.7727  |
| 6  |    | 11.223 | 1396.281   | 38629.465    | 0.2355   |
| 总计 |    |        | 954456.811 | 16400683.432 | 100.0000 |

The HPLC spectrum of CU-12

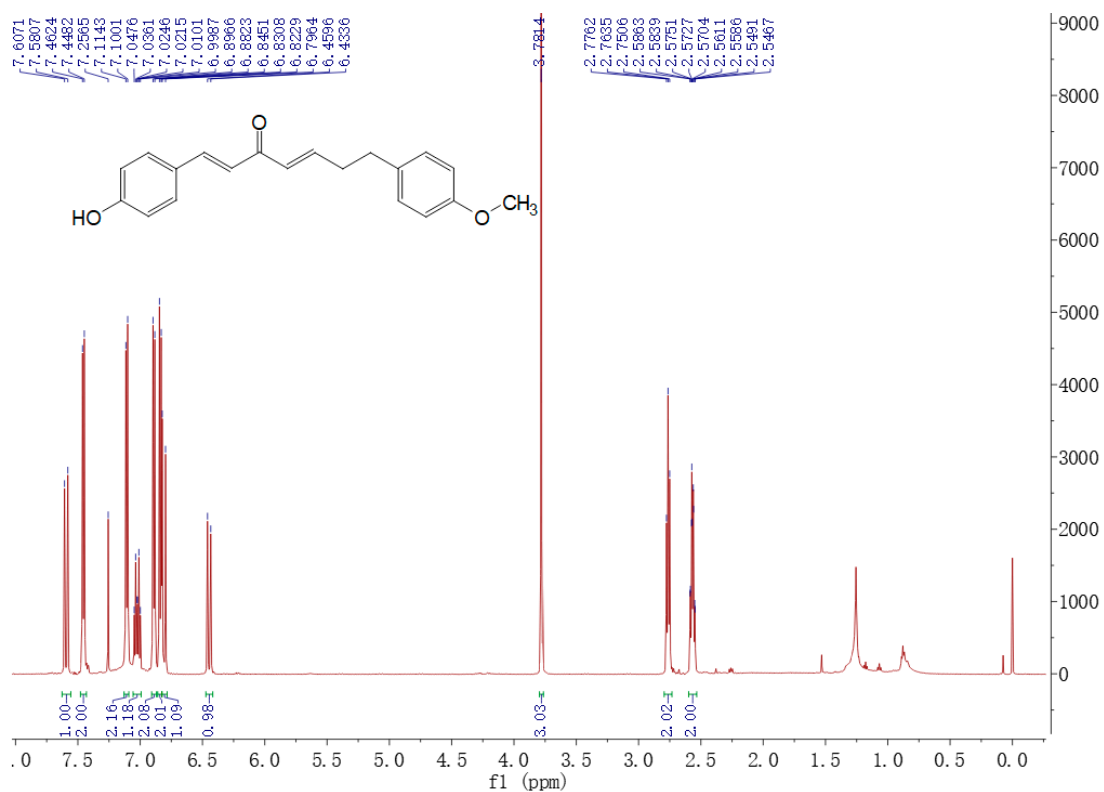

<sup>1</sup>H NMR spectrum of CU-13 (600 MHz, CDCl<sub>3</sub>)

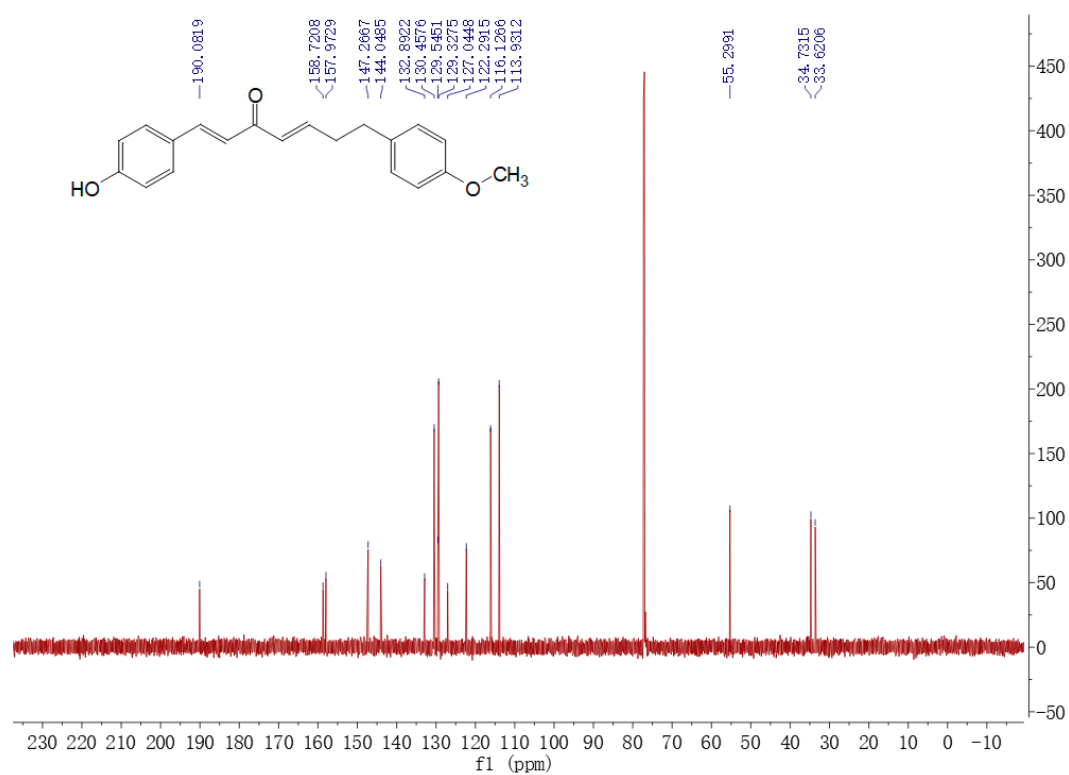

<sup>13</sup>C NMR spectrum of CU-13 (151 MHz, CDCl<sub>3</sub>)

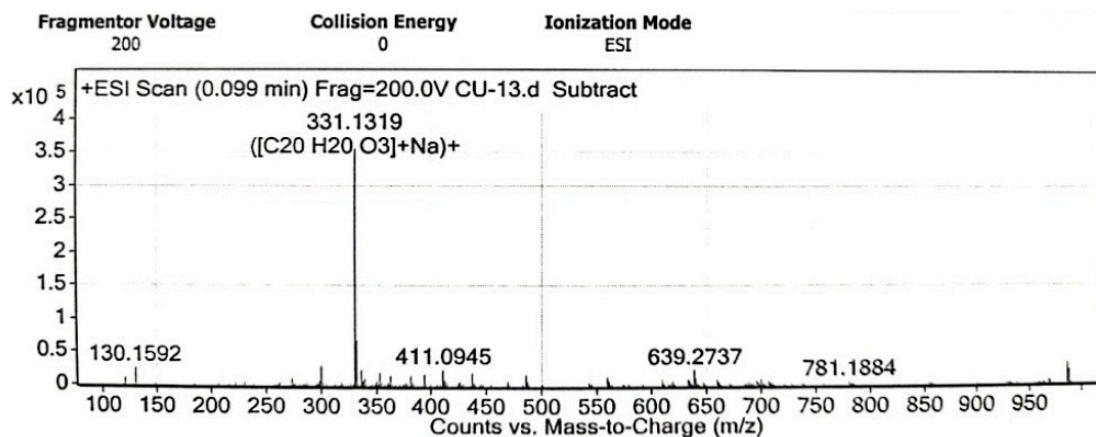

HRMS spectrum of CU-13

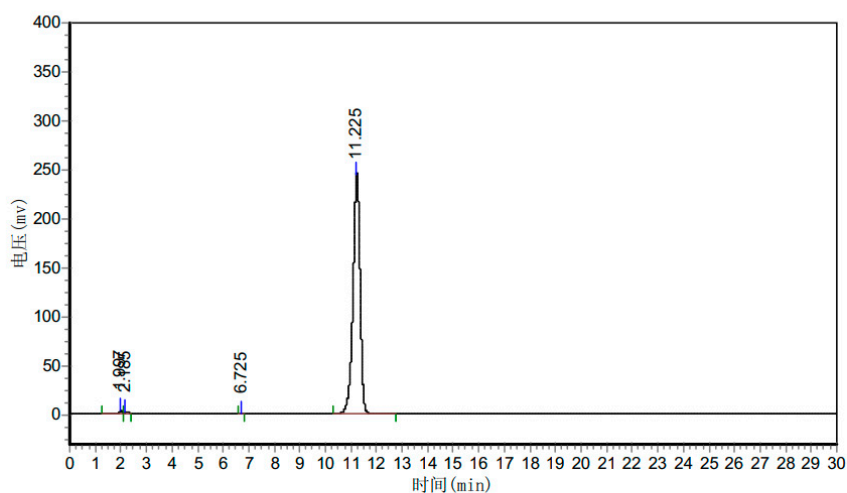

分析结果表

| 峰号 | 峰名 | 保留时间   | 峰高         | 峰面积         | 含量       |
|----|----|--------|------------|-------------|----------|
| 1  |    | 1.997  | 4029.980   | 39066.336   | 0.8170   |
| 2  |    | 2.185  | 2475.585   | 26860.914   | 0.5618   |
| 3  |    | 6.725  | 18.771     | 163.950     | 0.0034   |
| 4  |    | 11.225 | 245071.781 | 4715405.000 | 98.6178  |
| 总计 |    |        | 251596.117 | 4781496.200 | 100.0000 |

The HPLC spectrum of CU-13

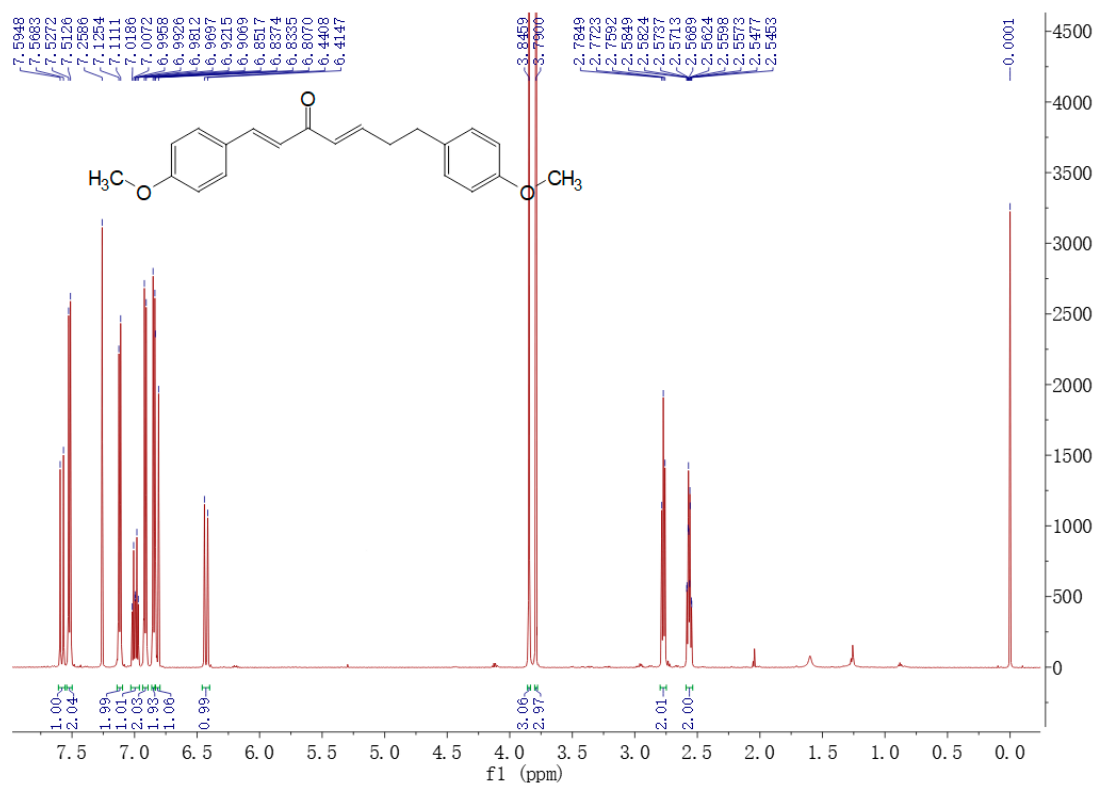

<sup>1</sup>H NMR spectrum of CU-14 (600 MHz, CDCl<sub>3</sub>)

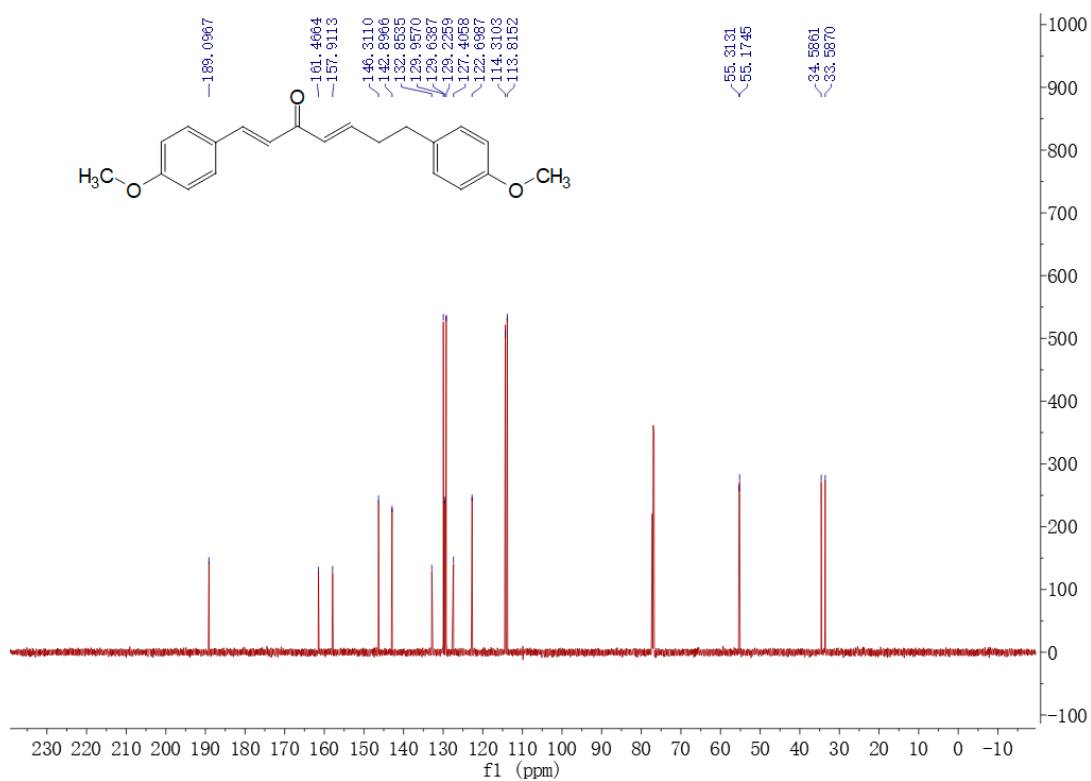

<sup>13</sup>C NMR spectrum of CU-14 (151 MHz, CDCl<sub>3</sub>)

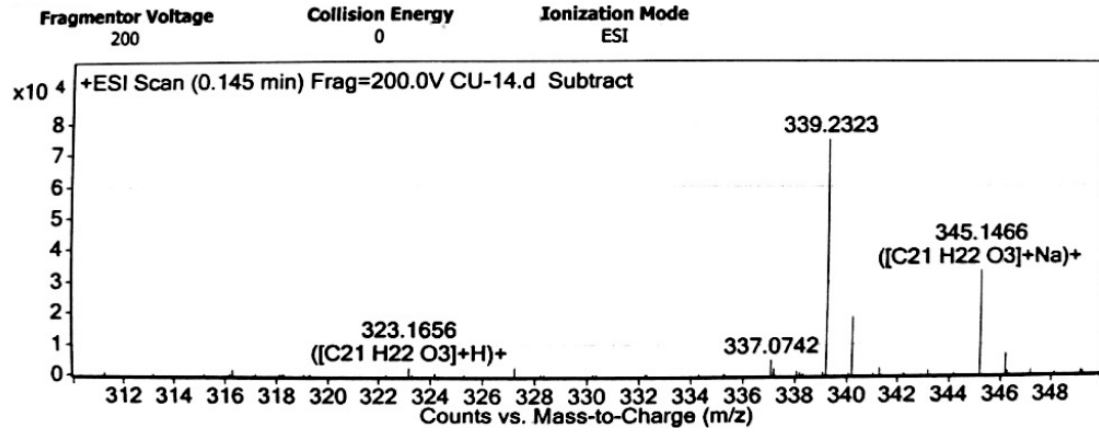

HRMS spectrum of CU-14

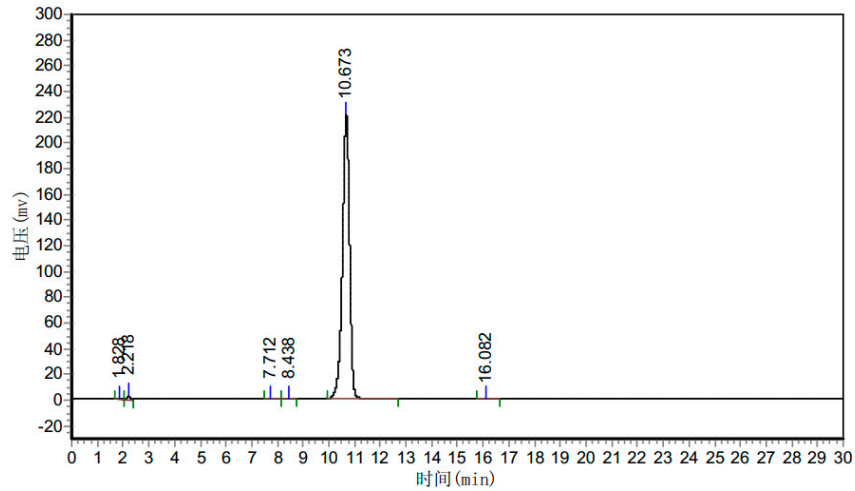

分析结果表

| 峰号 | 峰名 | 保留时间   | 峰高         | 峰面积         | 含量       |
|----|----|--------|------------|-------------|----------|
| 1  |    | 1.828  | 1090.357   | 16324.590   | 0.3779   |
| 2  |    | 2.218  | 2791.281   | 27769.631   | 0.6428   |
| 3  |    | 7.712  | 193.008    | 4214.891    | 0.0976   |
| 4  |    | 8.438  | 188.052    | 3209.481    | 0.0743   |
| 5  |    | 10.673 | 221175.578 | 4267936.500 | 98.7876  |
| 6  |    | 16.082 | 35.673     | 861.950     | 0.0200   |
| 总计 |    |        | 225473.949 | 4320317.043 | 100.0000 |

The HPLC spectrum of CU-14

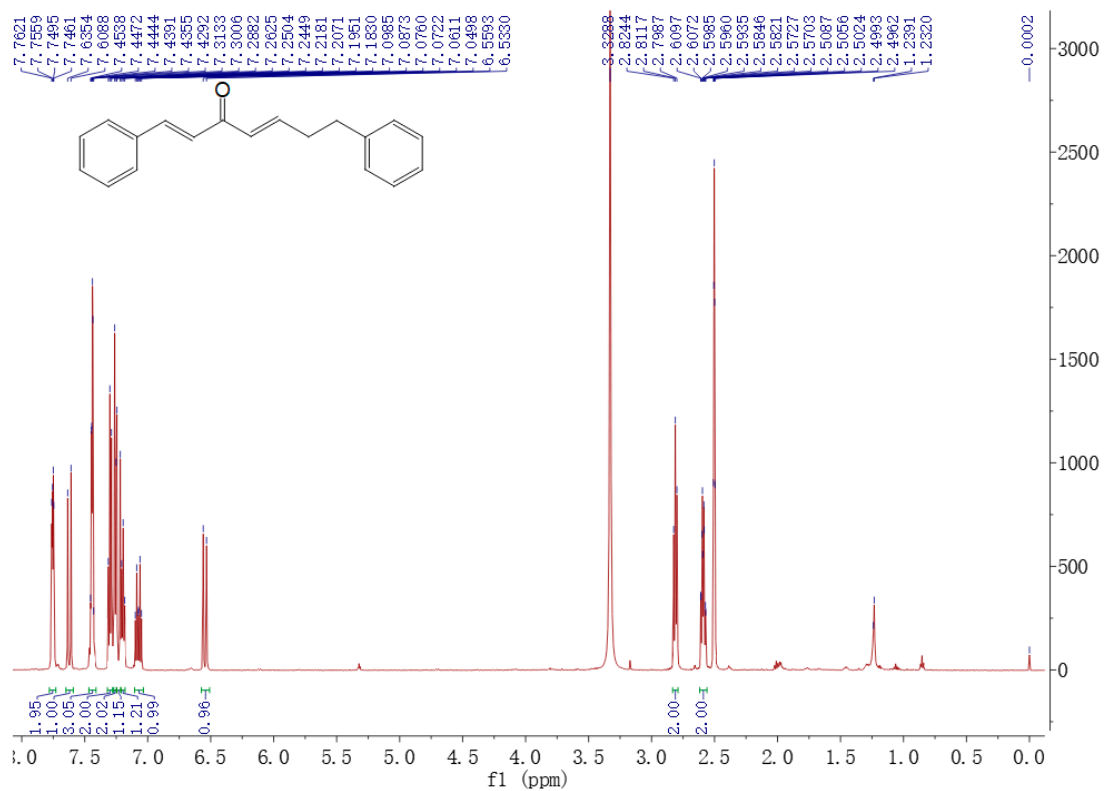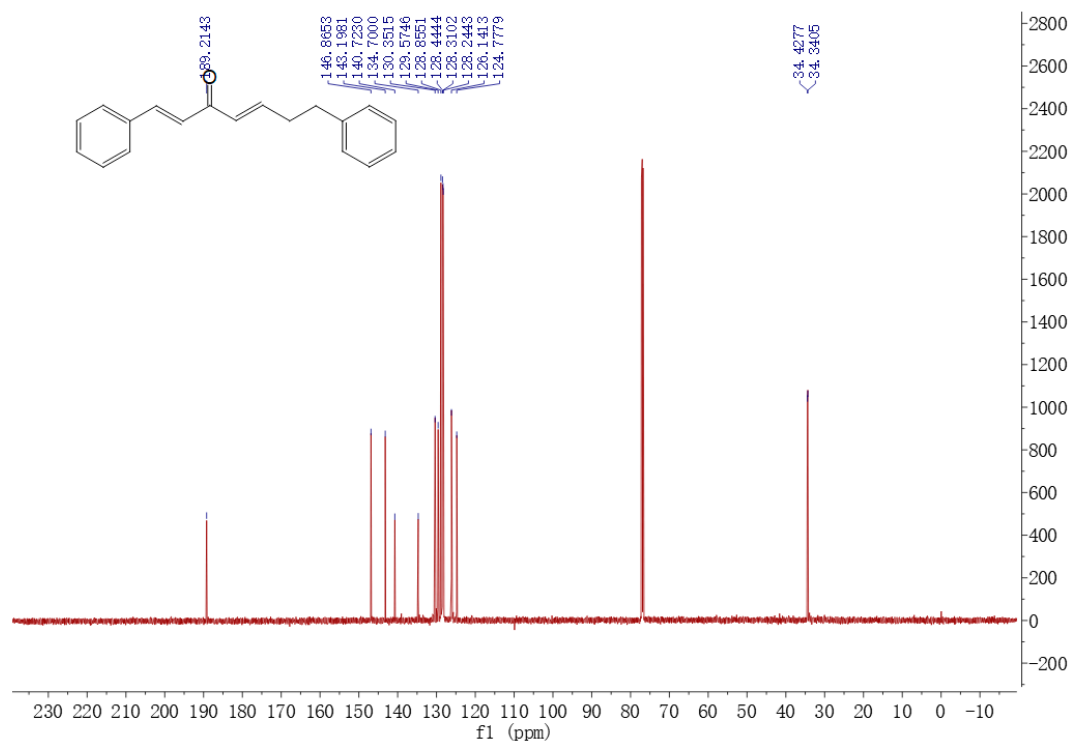

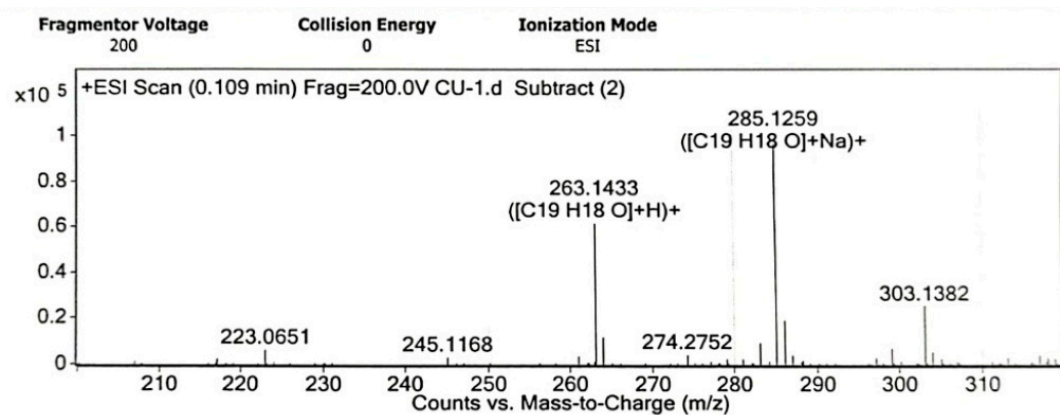

HRMS spectrum of CU-15

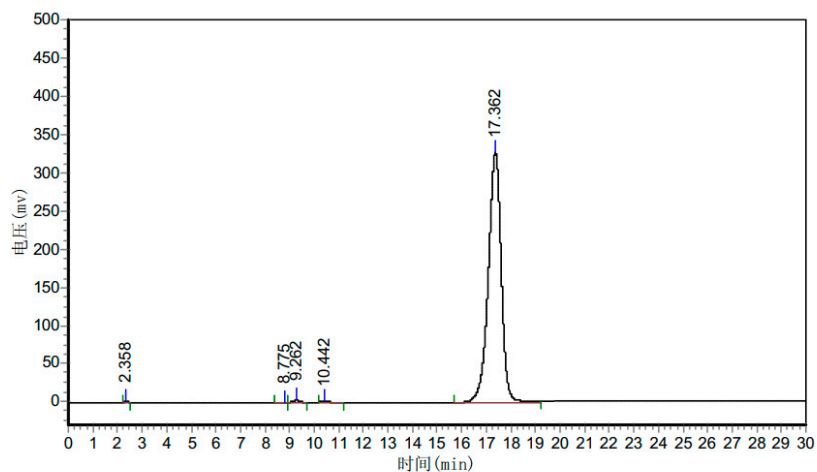

分析结果表

| 峰号 | 峰名 | 保留时间   | 峰高         | 峰面积          | 含量       |
|----|----|--------|------------|--------------|----------|
| 1  |    | 2.358  | 2468.408   | 23122.396    | 0.1904   |
| 2  |    | 8.775  | 590.802    | 9853.272     | 0.0811   |
| 3  |    | 9.262  | 2853.672   | 66528.758    | 0.5478   |
| 4  |    | 10.442 | 1599.628   | 46737.375    | 0.3849   |
| 5  |    | 17.362 | 328269.375 | 11997702.000 | 98.7958  |
| 总计 |    |        | 335781.885 | 12143943.802 | 100.0000 |

The HPLC spectrum of CU-15

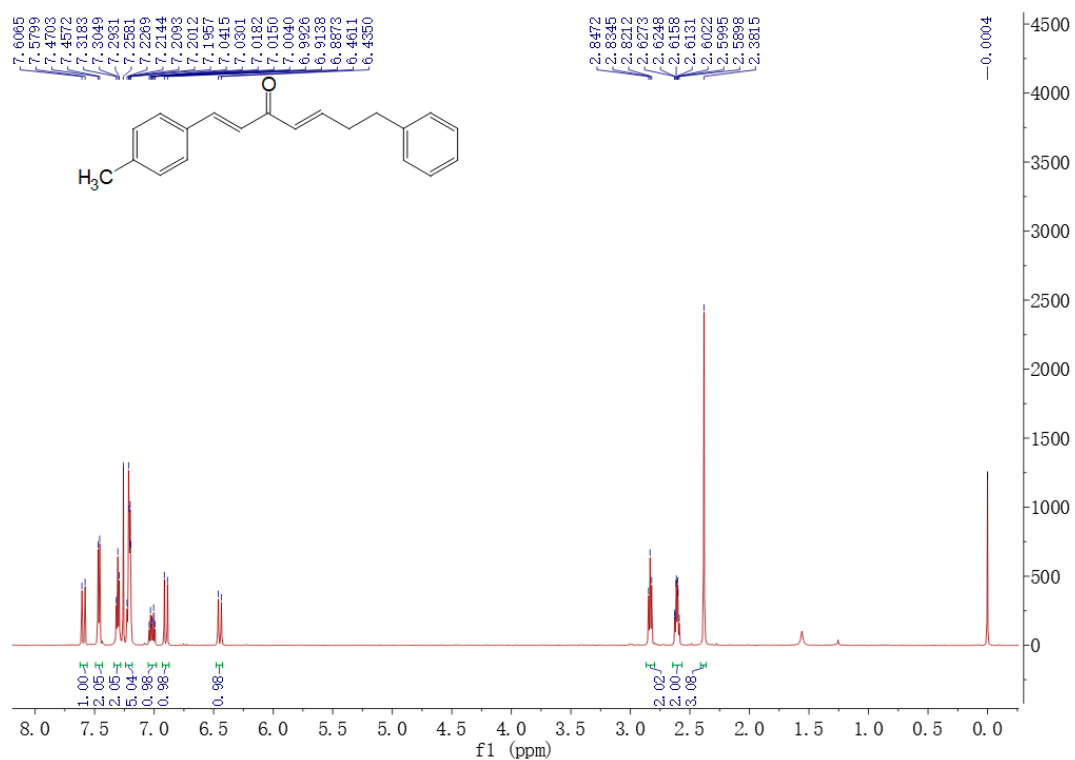

<sup>1</sup>H NMR spectrum of CU-16 (600 MHz, CDCl<sub>3</sub>)

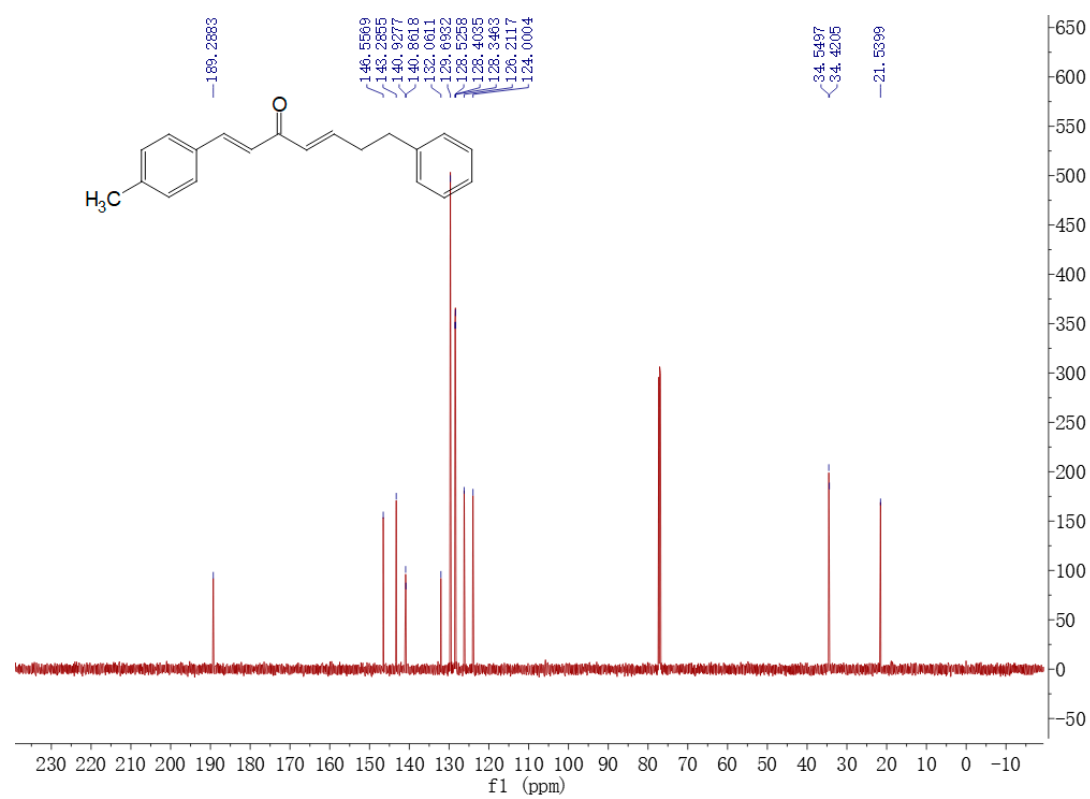

<sup>13</sup>C NMR spectrum of CU-16 (151 MHz, CDCl<sub>3</sub>)



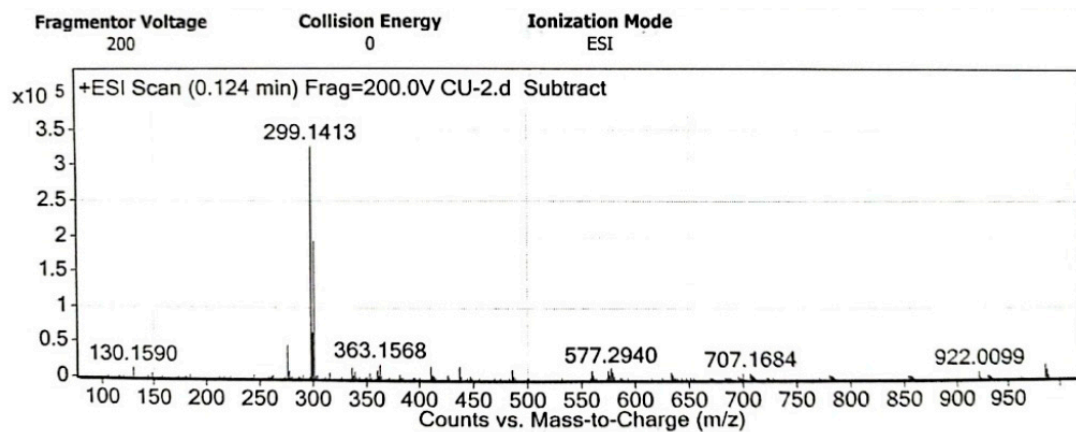

HRMS spectrum of CU-16

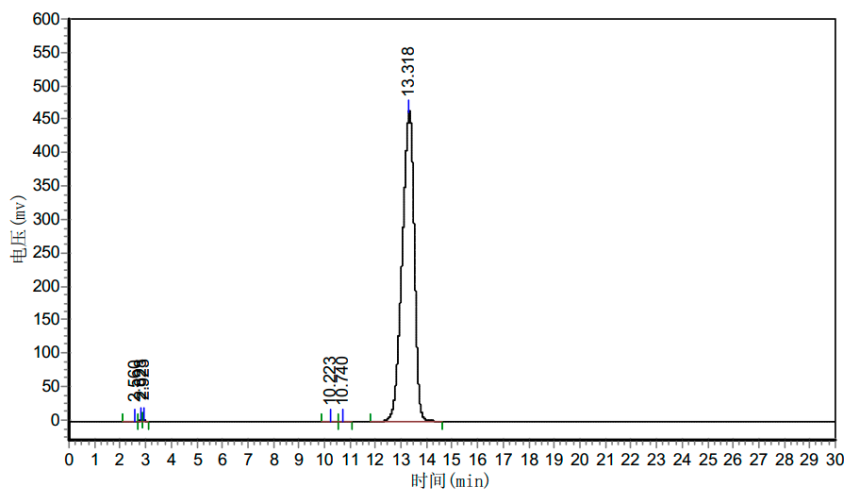

分析结果表

| 峰号 | 峰名 | 保留时间   | 峰高         | 峰面积          | 含量       |
|----|----|--------|------------|--------------|----------|
| 1  |    | 2.560  | 1155.828   | 15794.859    | 0.1024   |
| 2  |    | 2.828  | 2396.271   | 20468.115    | 0.1327   |
| 3  |    | 2.923  | 3438.740   | 26358.938    | 0.1709   |
| 4  |    | 10.223 | 76.064     | 1574.164     | 0.0102   |
| 5  |    | 10.740 | 66.494     | 1430.696     | 0.0093   |
| 6  |    | 13.318 | 464130.813 | 15360320.000 | 99.5746  |
| 总计 |    |        | 471264.210 | 15425946.772 | 100.0000 |

The HPLC spectrum of CU-16

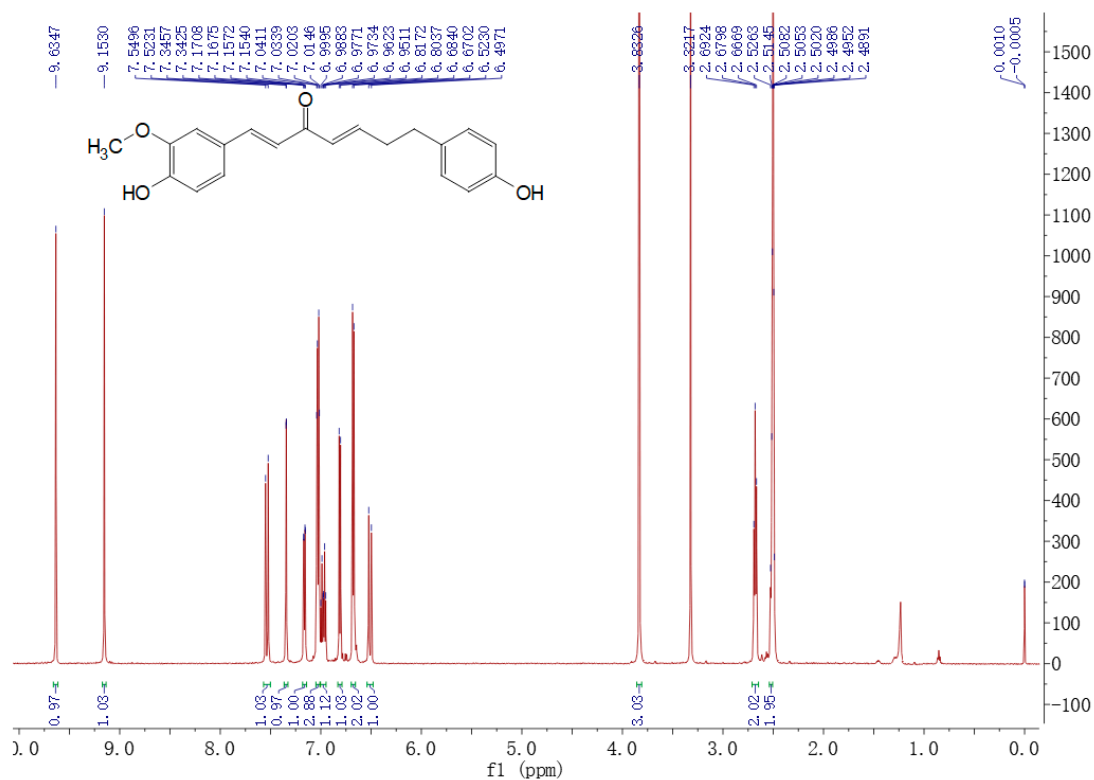

<sup>1</sup>H NMR spectrum of CU-17 (600 MHz, DMSO-*d*<sub>6</sub>)

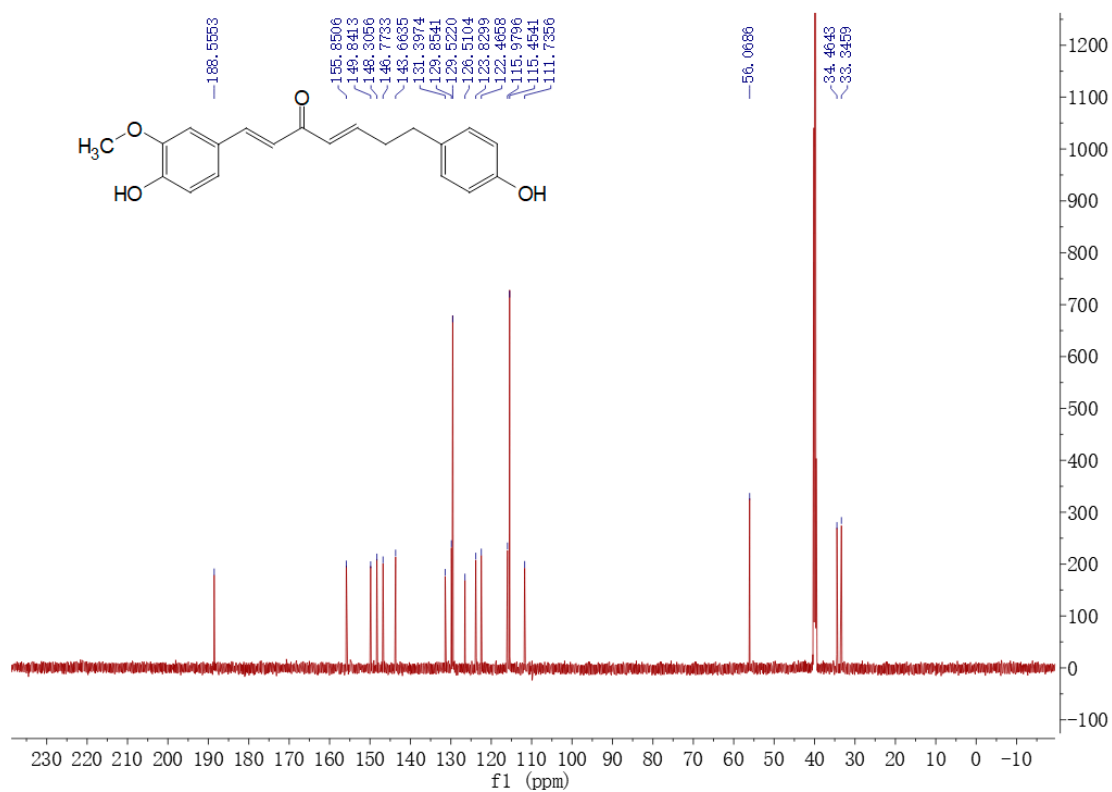

<sup>13</sup>C NMR spectrum of CU-17 (151 MHz, DMSO-*d*<sub>6</sub>)

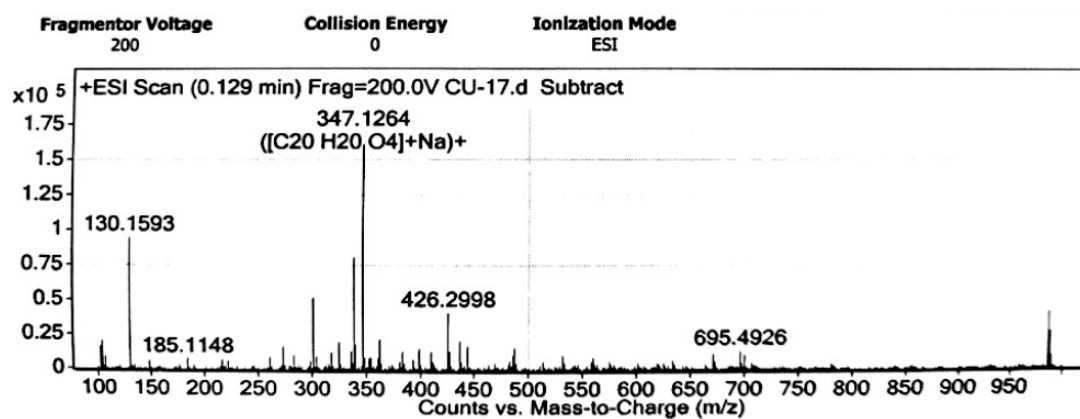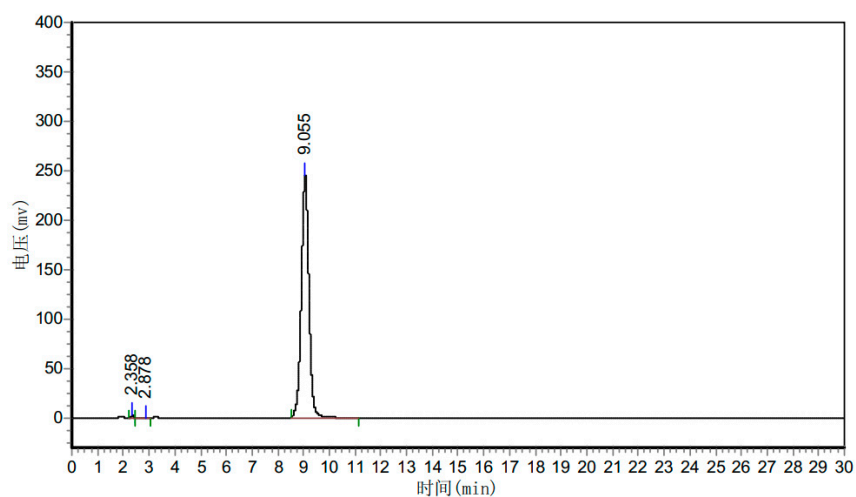

分析结果表

| 峰号 | 峰名 | 保留时间  | 峰高         | 峰面积         | 含量       |
|----|----|-------|------------|-------------|----------|
| 1  |    | 2.358 | 3597.047   | 32145.783   | 0.6201   |
| 2  |    | 2.878 | 696.289    | 24007.377   | 0.4631   |
| 3  |    | 9.055 | 245961.563 | 5127918.000 | 98.9168  |
| 总计 |    |       | 250254.899 | 5184071.160 | 100.0000 |

The HPLC spectrum of CU-17

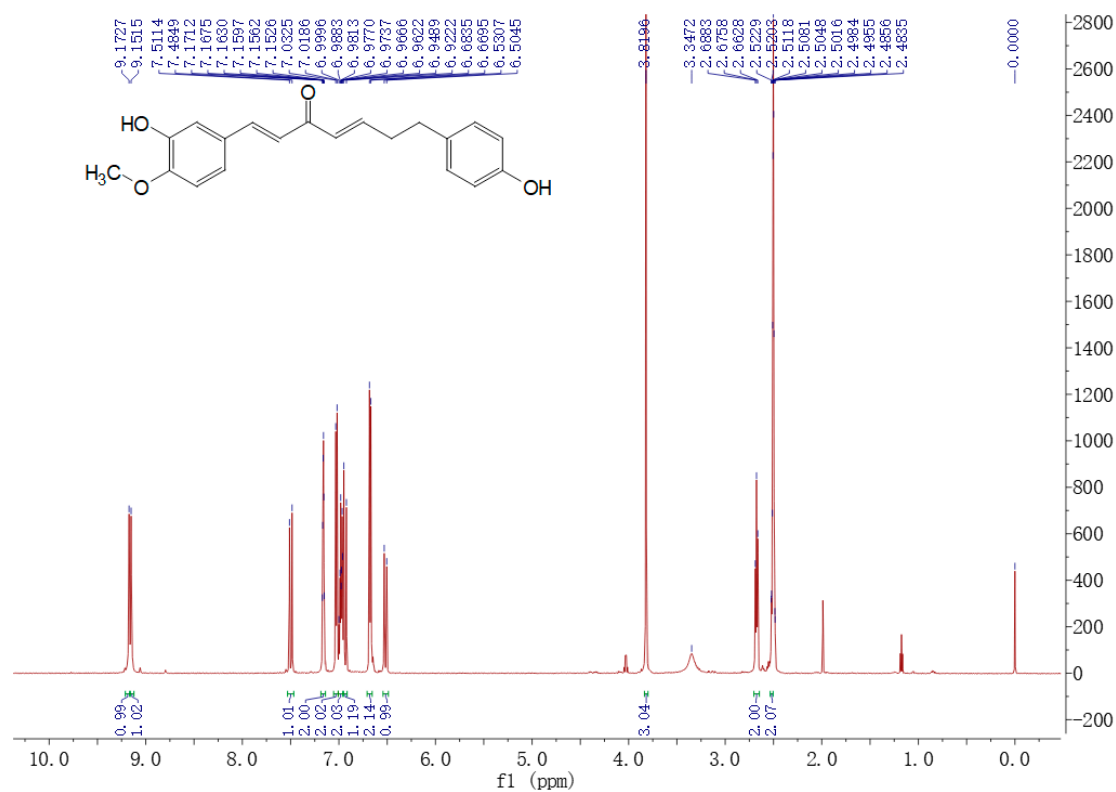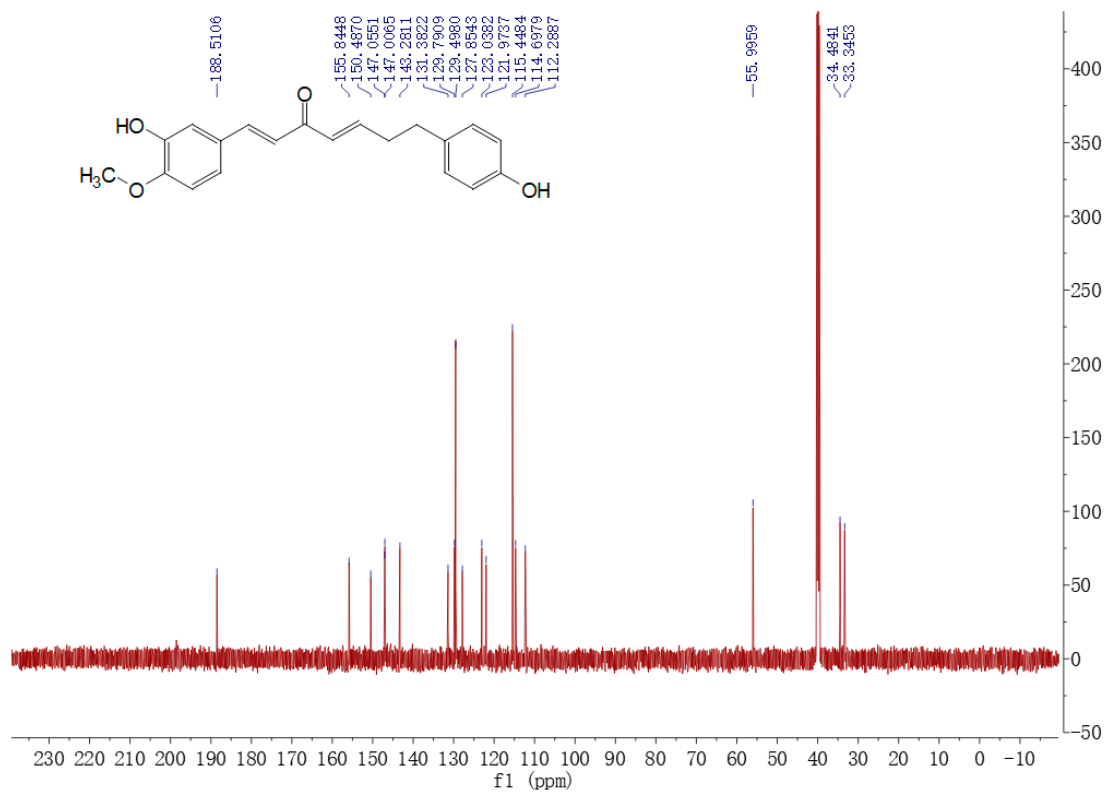

**<sup>13</sup>C NMR spectrum of CU-18 (151 MHz, DMSO-*d*<sub>6</sub>)**

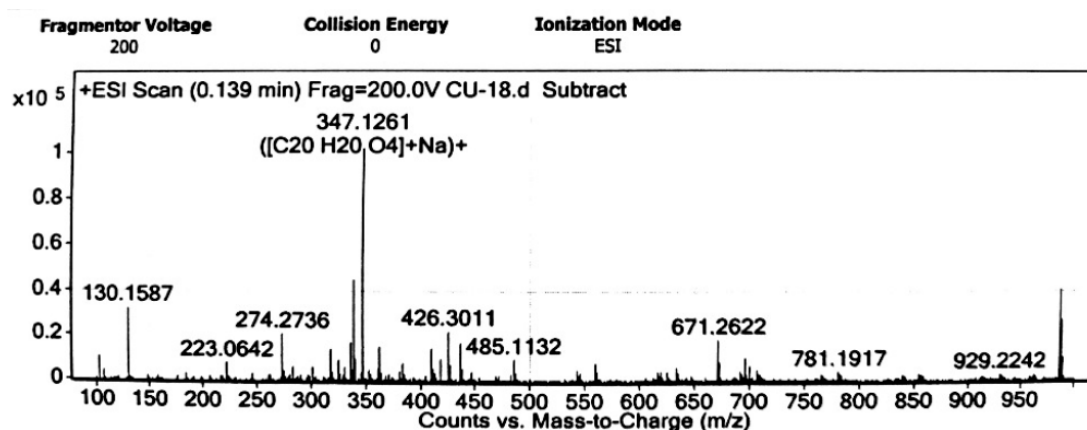

HRMS spectrum of CU-18

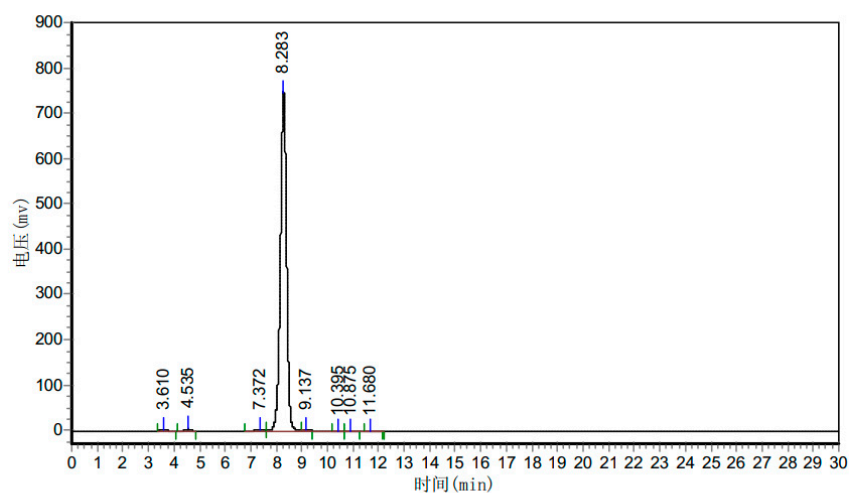

分析结果表

| 峰号 | 峰名 | 保留时间   | 峰高         | 峰面积          | 含量       |
|----|----|--------|------------|--------------|----------|
| 1  |    | 3.610  | 1992.307   | 35446.059    | 0.2789   |
| 2  |    | 4.535  | 3685.352   | 47547.102    | 0.3742   |
| 3  |    | 7.372  | 1138.950   | 29954.449    | 0.2357   |
| 4  |    | 8.283  | 748021.500 | 12576824.000 | 98.9697  |
| 5  |    | 9.137  | 734.525    | 9428.700     | 0.0742   |
| 6  |    | 10.395 | 39.964     | 513.702      | 0.0040   |
| 7  |    | 10.875 | 247.083    | 4196.156     | 0.0330   |
| 8  |    | 11.680 | 188.055    | 3835.099     | 0.0302   |
| 总计 |    |        | 756047.736 | 12707745.266 | 100.0000 |

The HPLC spectrum of CU-18

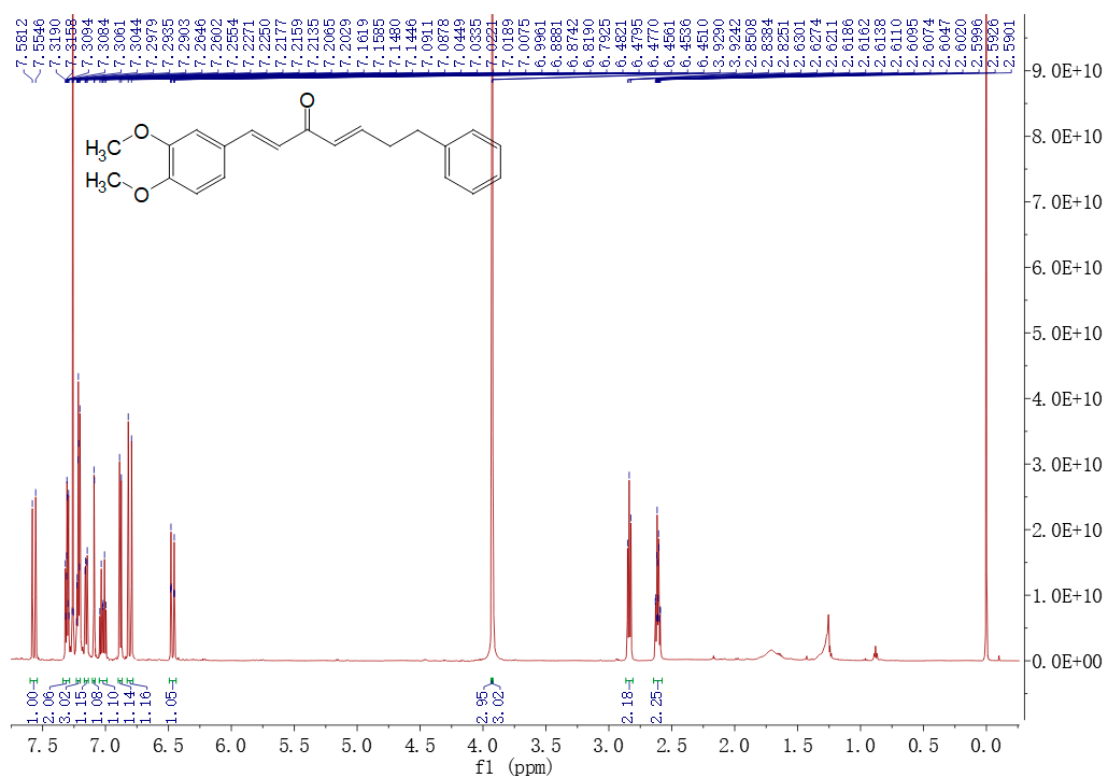

<sup>1</sup>H NMR spectrum of CU-19 (600 MHz, CDCl<sub>3</sub>)

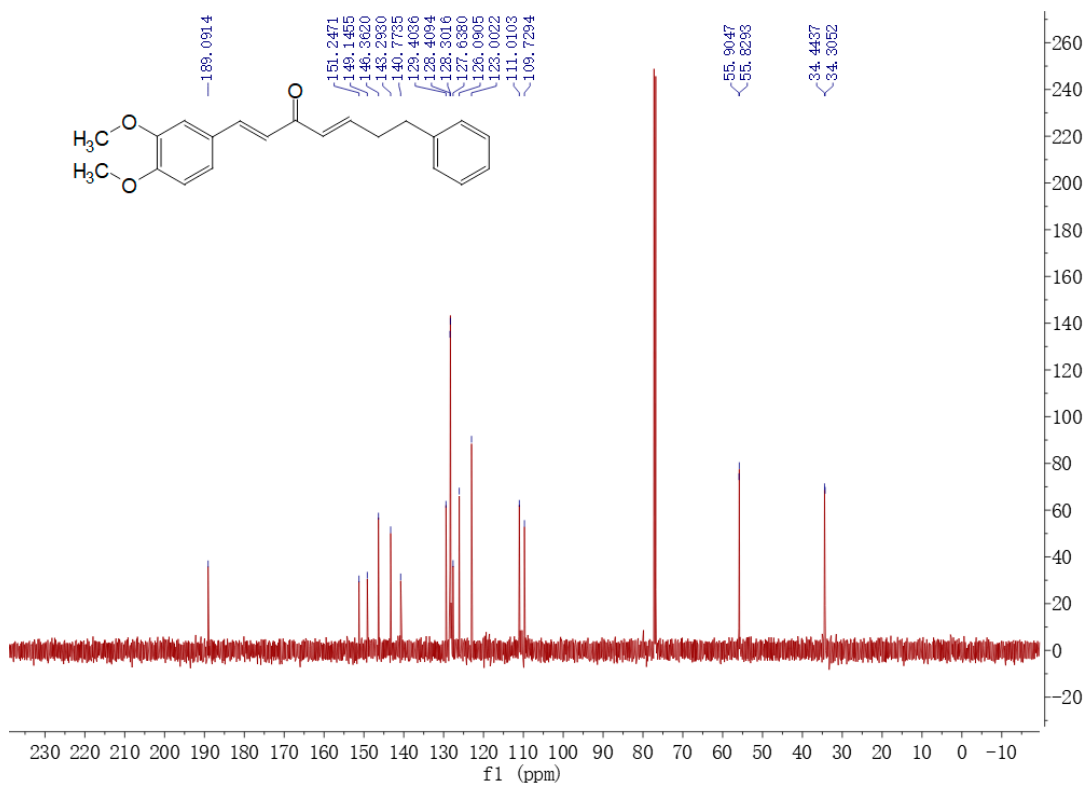

<sup>13</sup>C NMR spectrum of CU-19 (151 MHz, CDCl<sub>3</sub>)

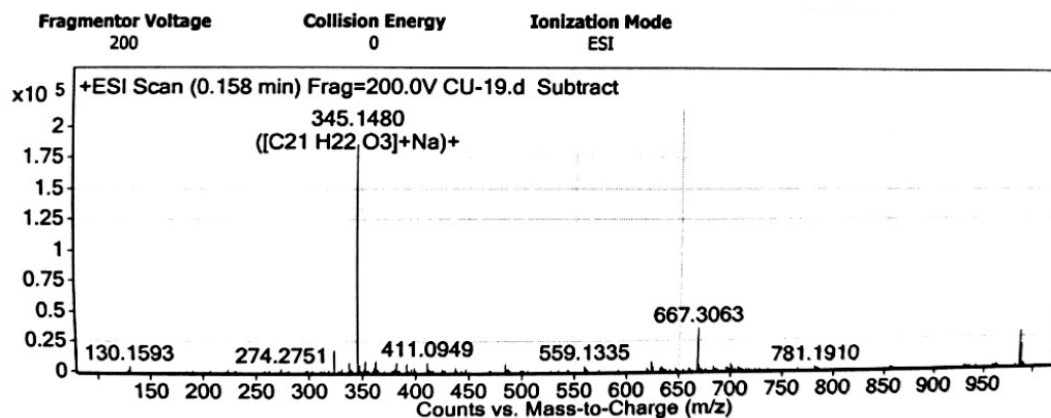

HRMS spectrum of CU-19

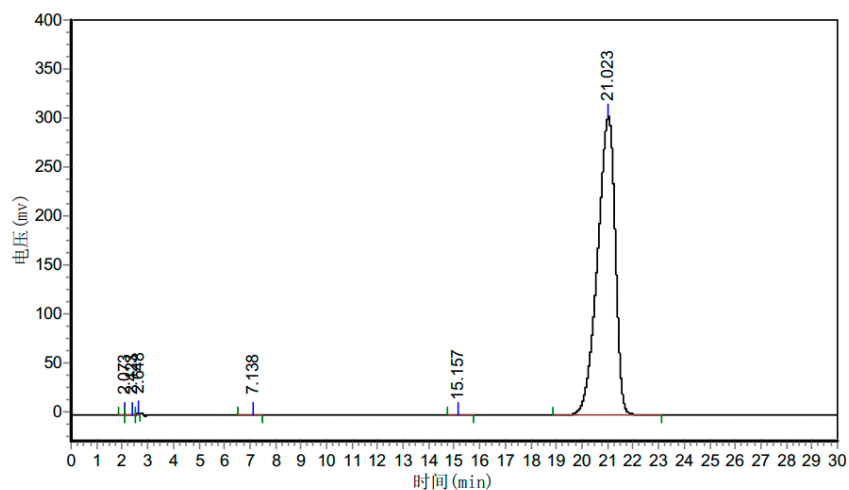

分析结果表

| 峰号 | 峰名 | 保留时间   | 峰高         | 峰面积          | 含量       |
|----|----|--------|------------|--------------|----------|
| 1  |    | 2.073  | 100.034    | 605.651      | 0.0041   |
| 2  |    | 2.423  | 774.456    | 7857.278     | 0.0529   |
| 3  |    | 2.648  | 1997.720   | 18678.699    | 0.1258   |
| 4  |    | 7.138  | 113.700    | 3017.489     | 0.0203   |
| 5  |    | 15.157 | 86.438     | 2275.711     | 0.0153   |
| 6  |    | 21.023 | 306195.469 | 14812987.000 | 99.7815  |
| 总计 |    |        | 309267.817 | 14845421.828 | 100.0000 |

The HPLC spectrum of CU-19

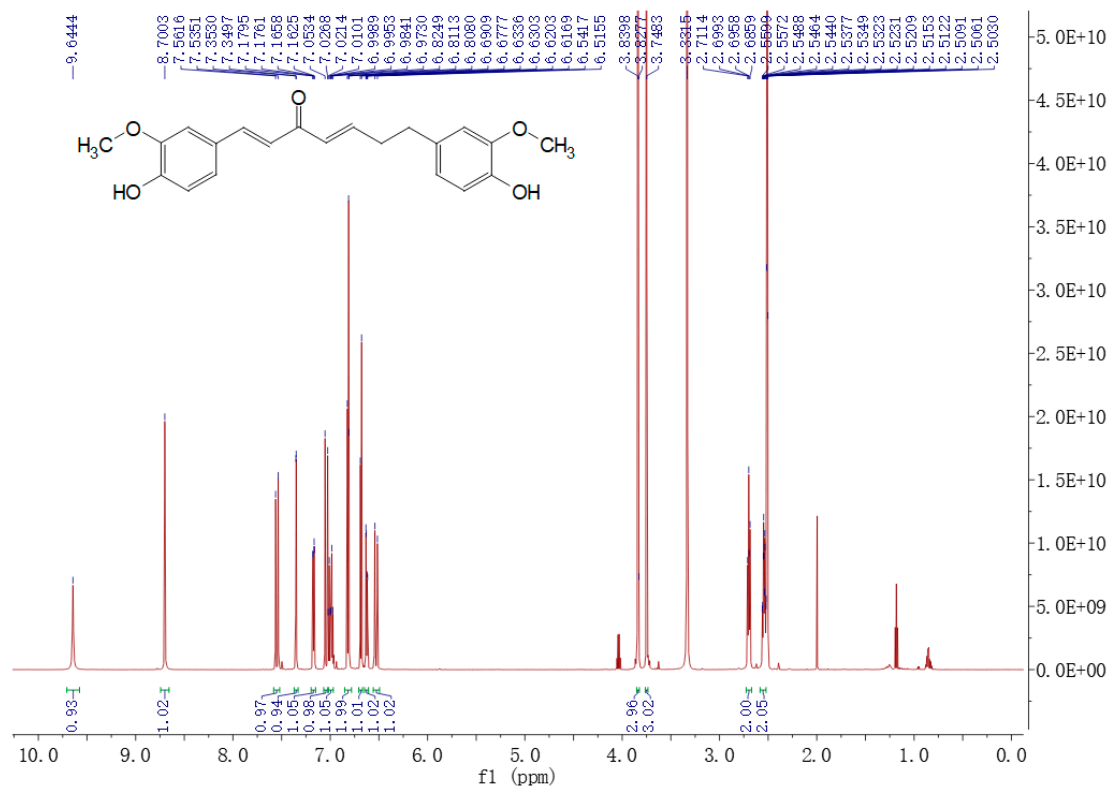

<sup>1</sup>H NMR spectrum of CU-20 (600 MHz, DMSO-*d*<sub>6</sub>)

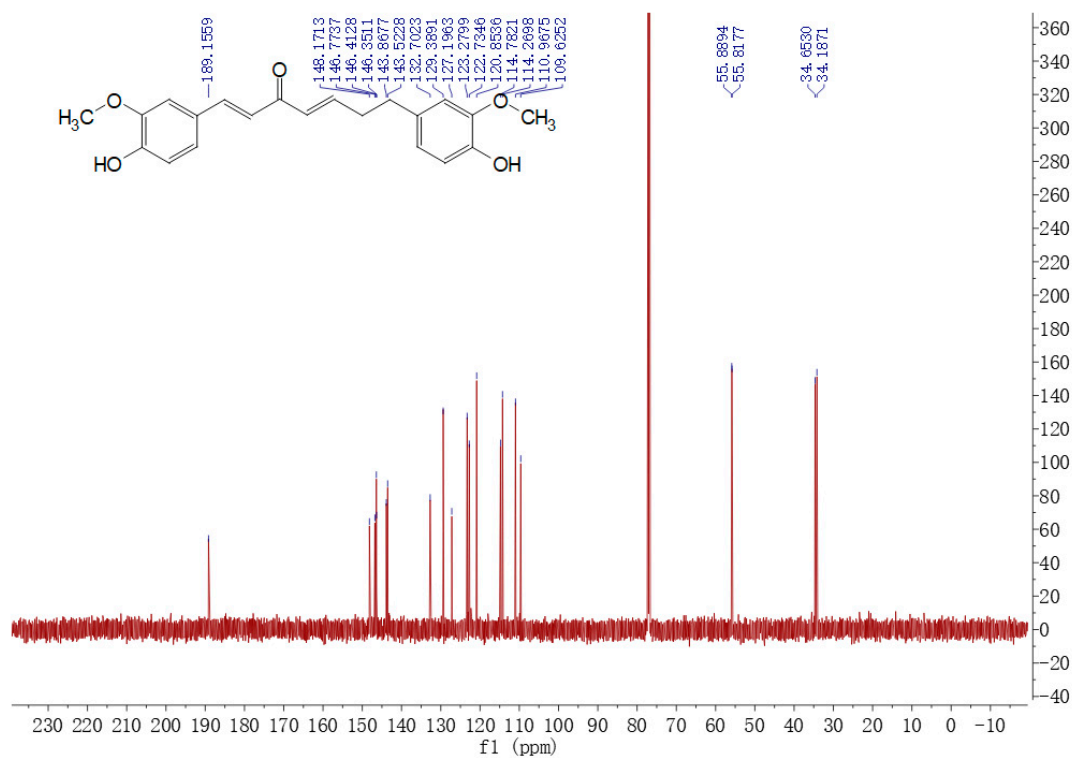

<sup>13</sup>C NMR spectrum of CU-20 (151 MHz, CDCl<sub>3</sub>)



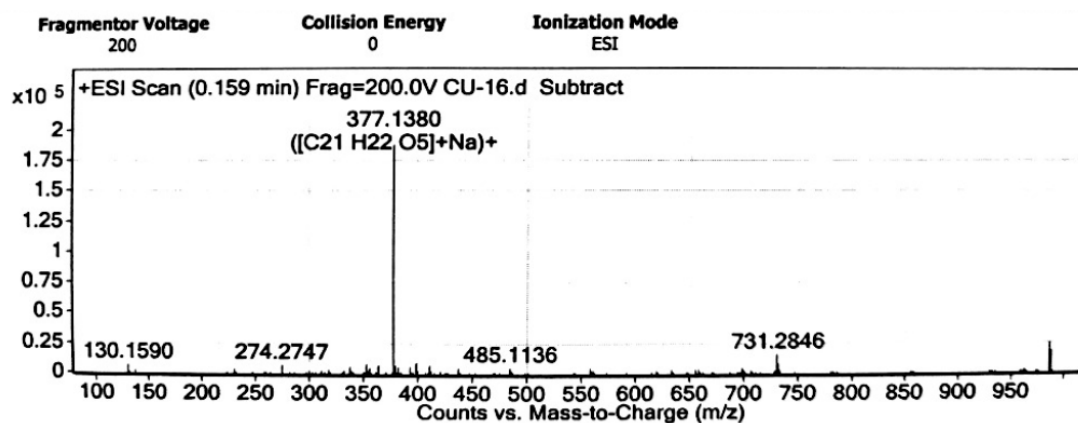

HRMS spectrum of CU-20

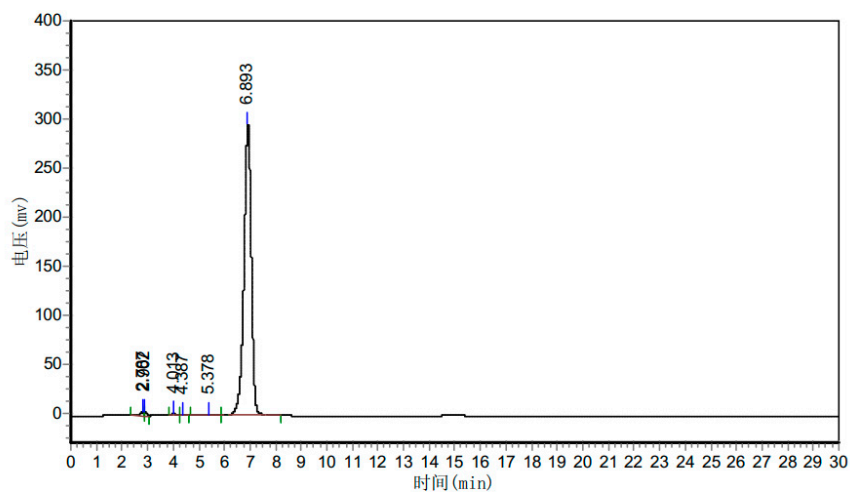

分析结果表

| 峰号 | 峰名 | 保留时间  | 峰高         | 峰面积         | 含量       |
|----|----|-------|------------|-------------|----------|
| 1  |    | 2.787 | 3385.985   | 44478.063   | 0.5084   |
| 2  |    | 2.902 | 3399.358   | 22977.336   | 0.2627   |
| 3  |    | 4.013 | 1736.195   | 29728.010   | 0.3398   |
| 4  |    | 4.387 | 765.546    | 9617.381    | 0.1099   |
| 5  |    | 5.378 | 762.724    | 25239.002   | 0.2885   |
| 6  |    | 6.893 | 316028.875 | 8616037.000 | 98.4906  |
| 总计 |    |       | 326078.683 | 8748076.791 | 100.0000 |

The HPLC spectrum of CU-20

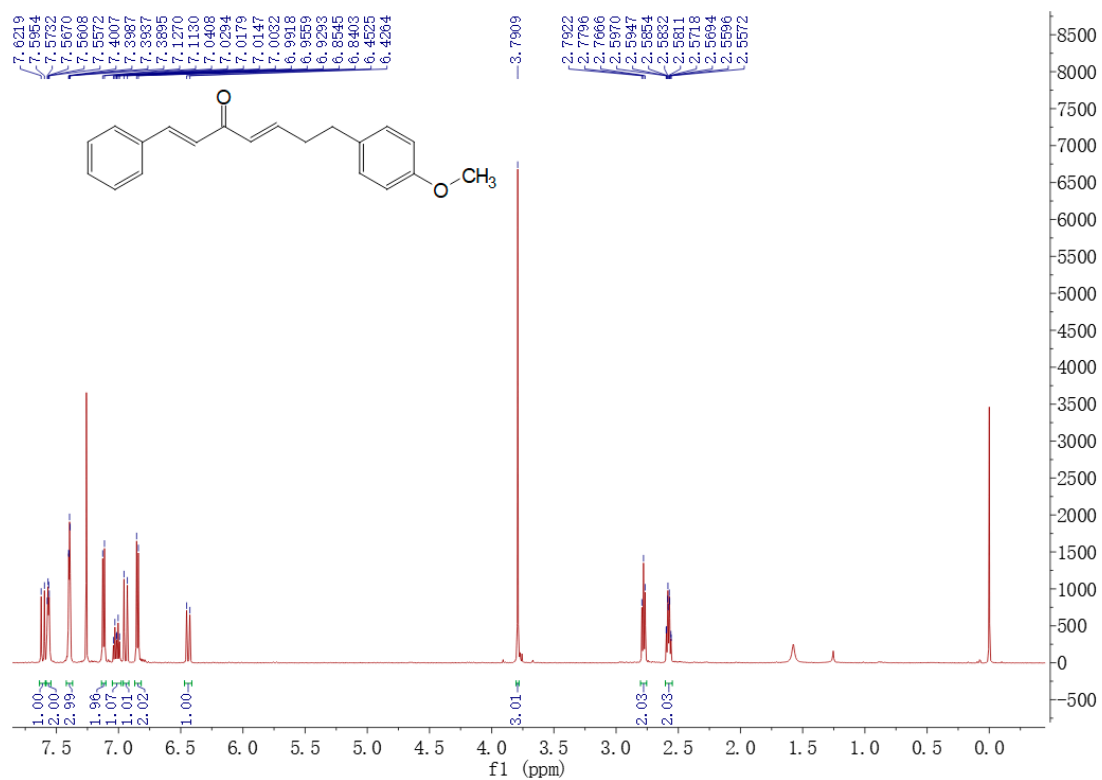

<sup>1</sup>H NMR spectrum of CU-21 (600 MHz, DMSO-*d*<sub>6</sub>)

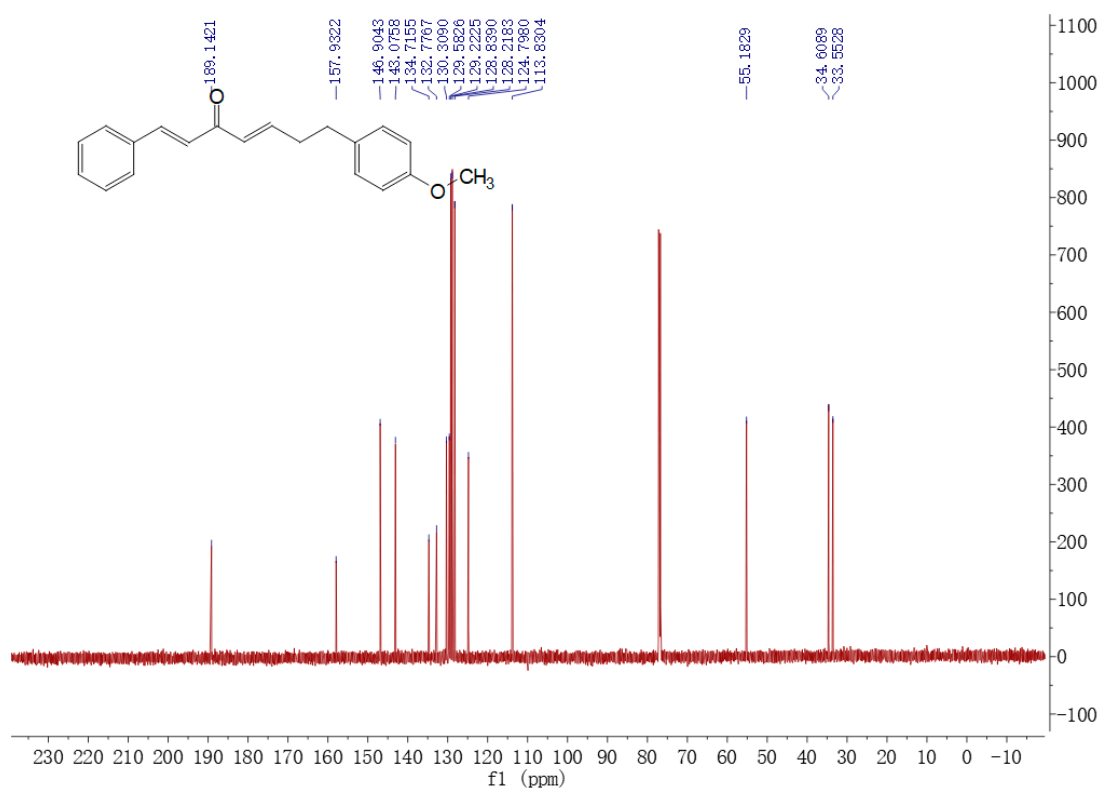

<sup>13</sup>C NMR spectrum of CU-21 (151 MHz, CDCl<sub>3</sub>)

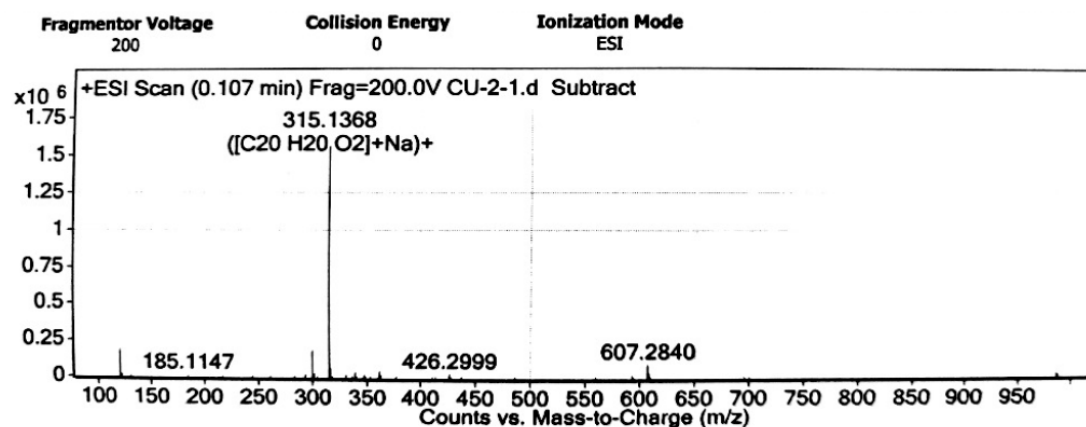

HRMS spectrum of CU-21

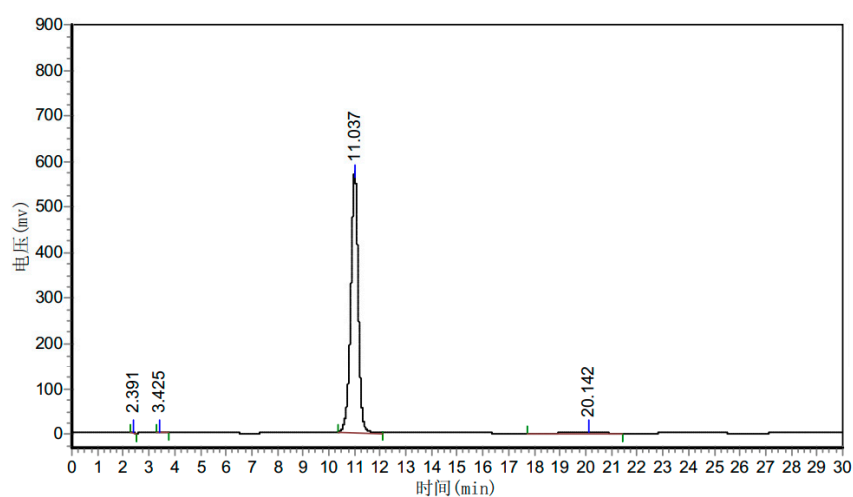

分析结果表

| 峰号 | 峰名 | 保留时间   | 峰高         | 峰面积          | 含量       |
|----|----|--------|------------|--------------|----------|
| 1  |    | 2.391  | 3002.290   | 25996.801    | 0.2181   |
| 2  |    | 3.425  | 2300.696   | 23682.129    | 0.1987   |
| 3  |    | 11.037 | 572452.625 | 11759446.000 | 98.6684  |
| 4  |    | 20.142 | 1761.638   | 109027.969   | 0.9148   |
| 总计 |    |        | 579517.249 | 11918152.898 | 100.0000 |

The HPLC spectrum of CU-21

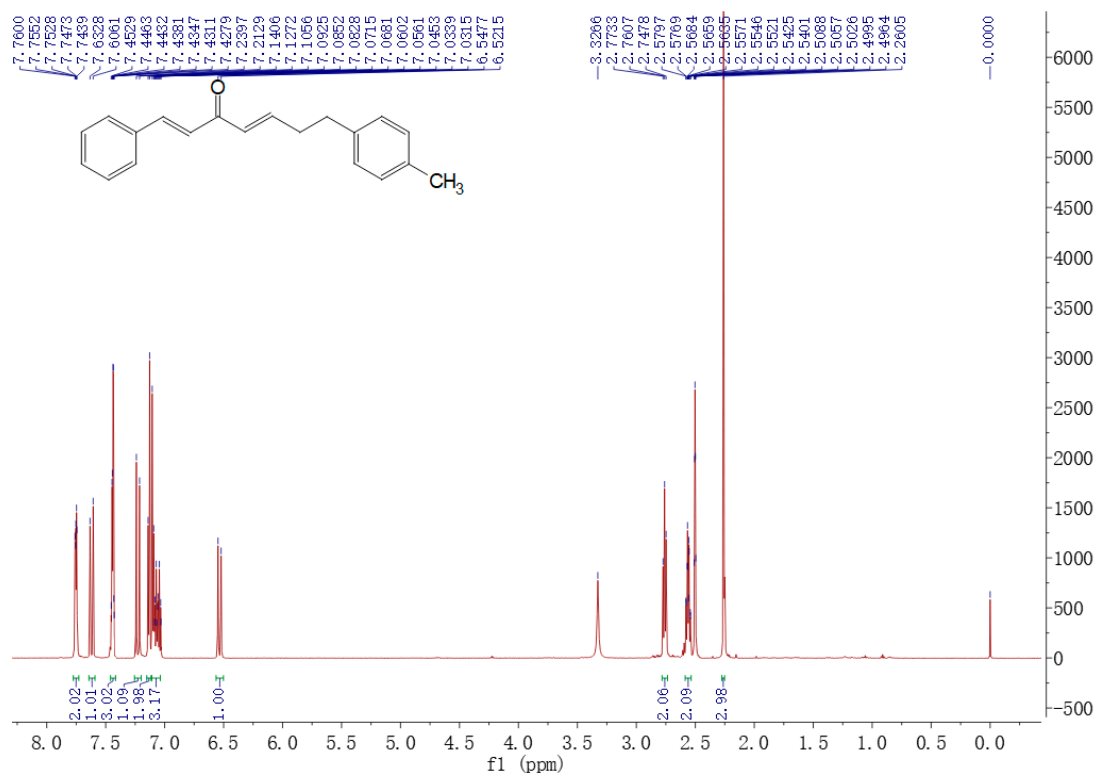

**<sup>1</sup>H NMR spectrum of CU-22 (600 MHz, DMSO-*d*<sub>6</sub>)**

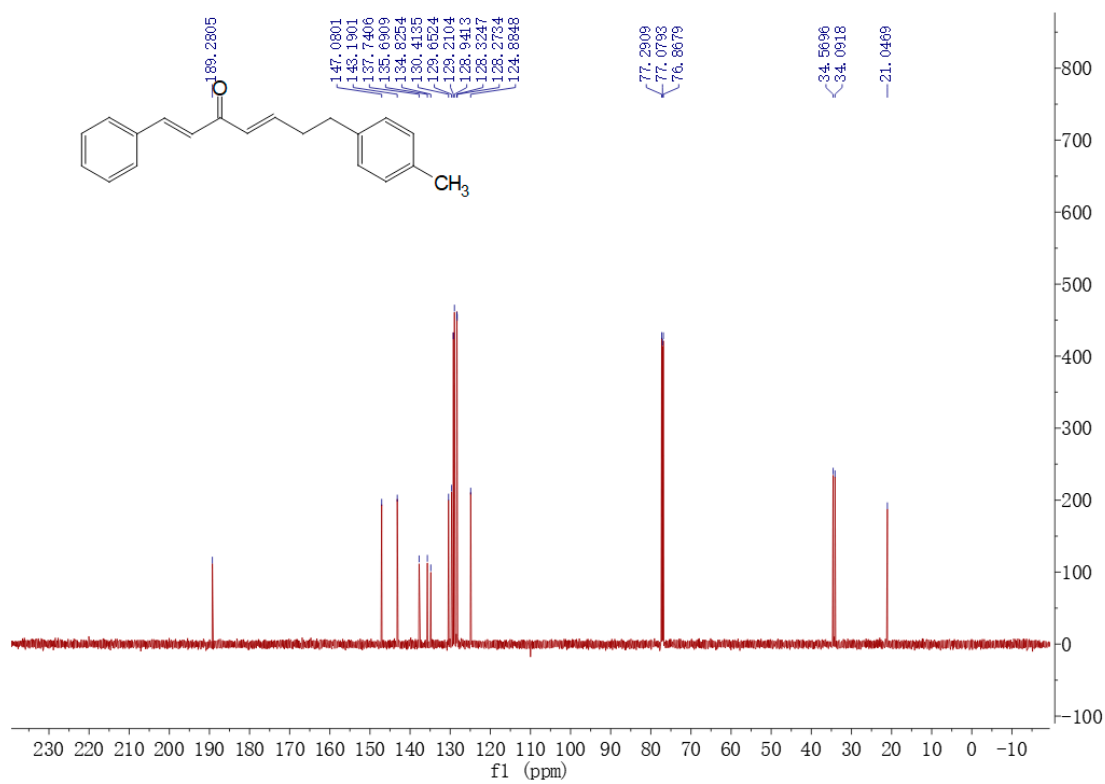

**<sup>13</sup>C NMR spectrum of CU-22 (151 MHz, CDCl<sub>3</sub>)**

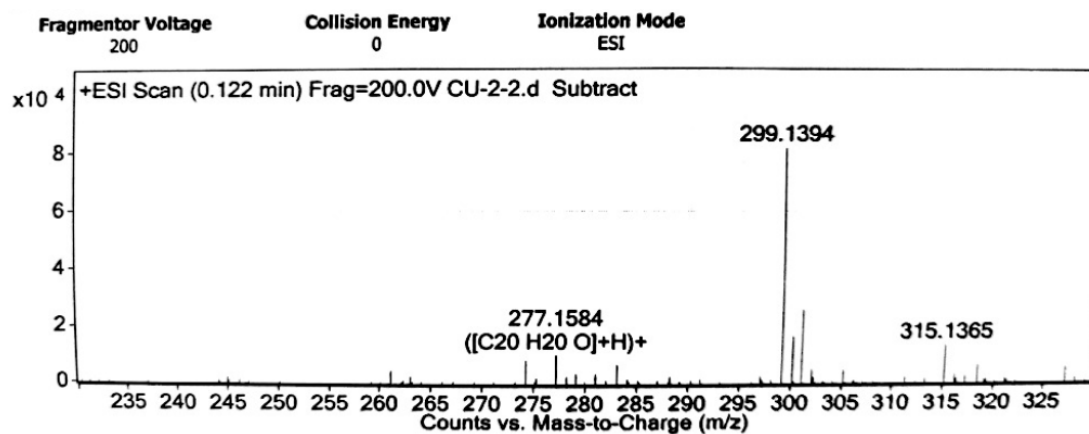

HRMS spectrum of CU-22

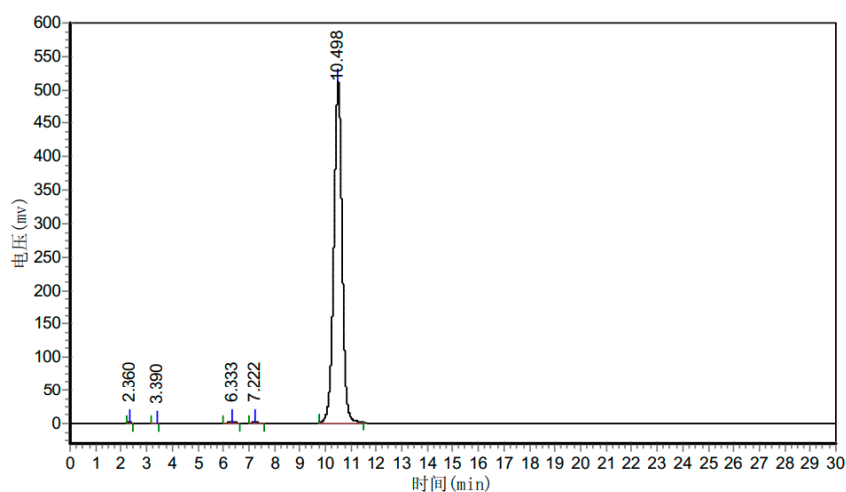

分析结果表

| 峰号 | 峰名 | 保留时间   | 峰高         | 峰面积          | 含量       |
|----|----|--------|------------|--------------|----------|
| 1  |    | 2.360  | 2905.563   | 27012.738    | 0.2292   |
| 2  |    | 3.390  | 321.310    | 3259.391     | 0.0277   |
| 3  |    | 6.333  | 3124.772   | 55271.230    | 0.4690   |
| 4  |    | 7.222  | 1659.751   | 34418.188    | 0.2921   |
| 5  |    | 10.498 | 512449.031 | 11664626.000 | 98.9820  |
| 总计 |    |        | 520460.428 | 11784587.547 | 100.0000 |

The HPLC spectrum of CU-22

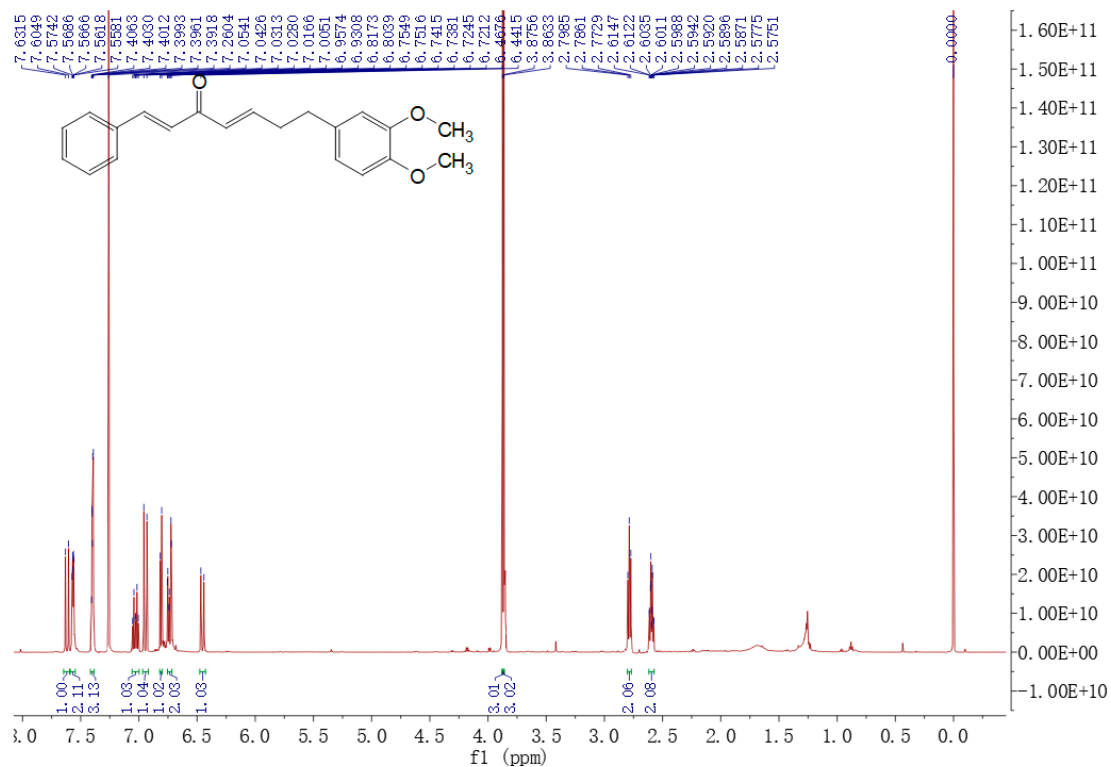

<sup>1</sup>H NMR spectrum of CU-23 (600 MHz, CDCl<sub>3</sub>)

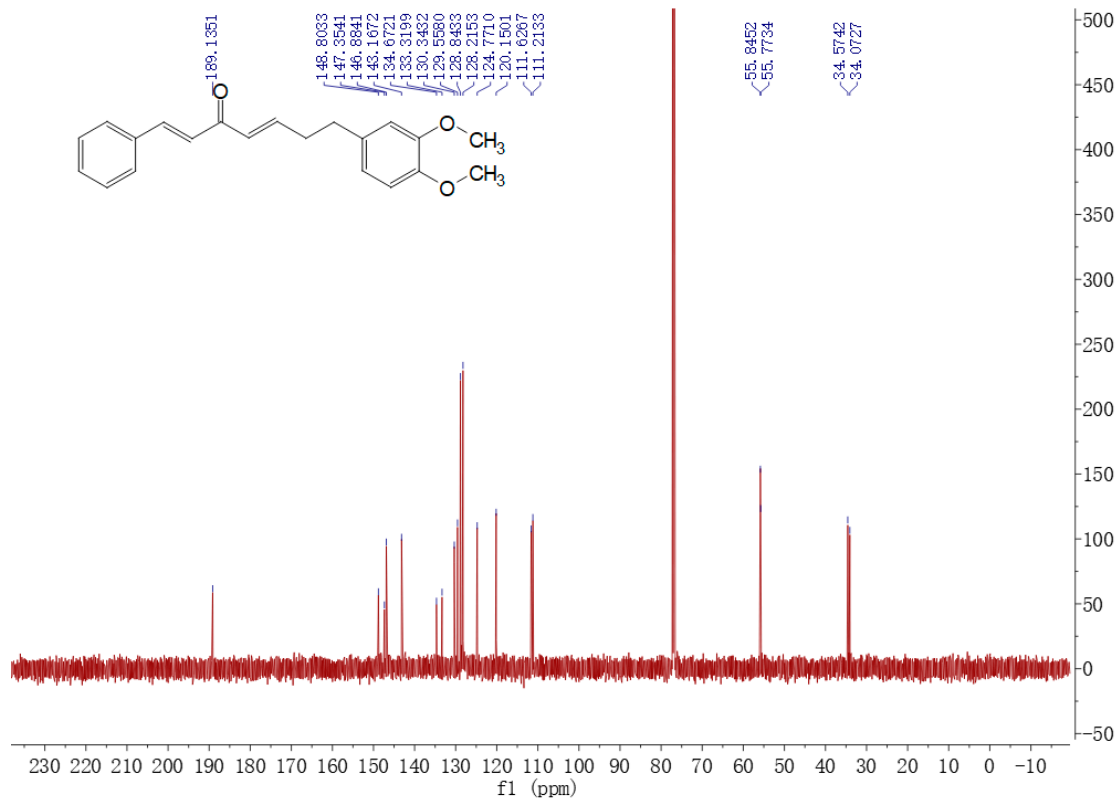

<sup>13</sup>C NMR spectrum of CU-23 (151 MHz, CDCl<sub>3</sub>)

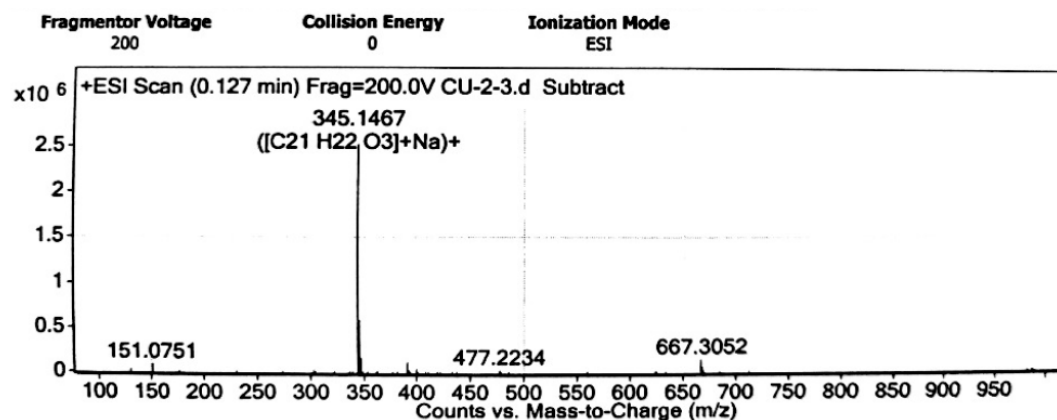

HRMS spectrum of CU-23

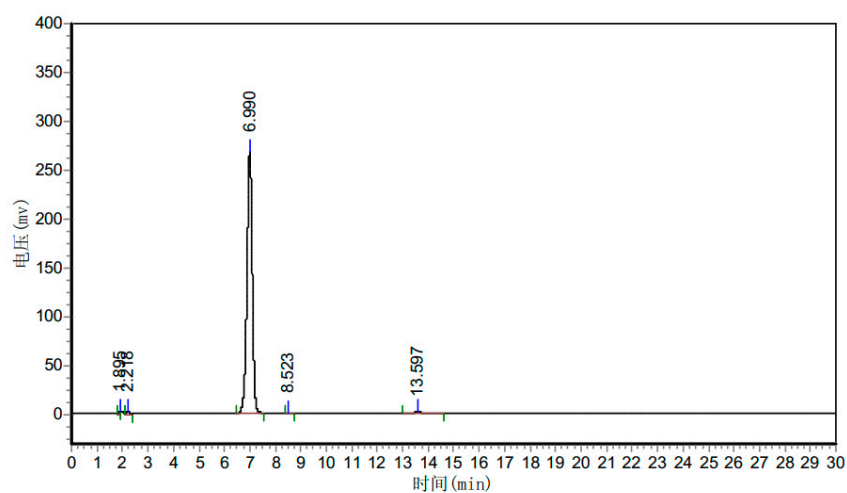

分析结果表

| 峰号 | 峰名 | 保留时间   | 峰高         | 峰面积         | 含量       |
|----|----|--------|------------|-------------|----------|
| 1  |    | 1.895  | 1713.736   | 11773.936   | 0.2966   |
| 2  |    | 2.218  | 3007.332   | 28375.893   | 0.7149   |
| 3  |    | 6.990  | 268341.344 | 3882909.750 | 97.8263  |
| 4  |    | 8.523  | 67.161     | 806.950     | 0.0203   |
| 5  |    | 13.597 | 1459.562   | 45320.070   | 1.1418   |
| 总计 |    |        | 274589.134 | 3969186.599 | 100.0000 |

The HPLC spectrum of CU-23

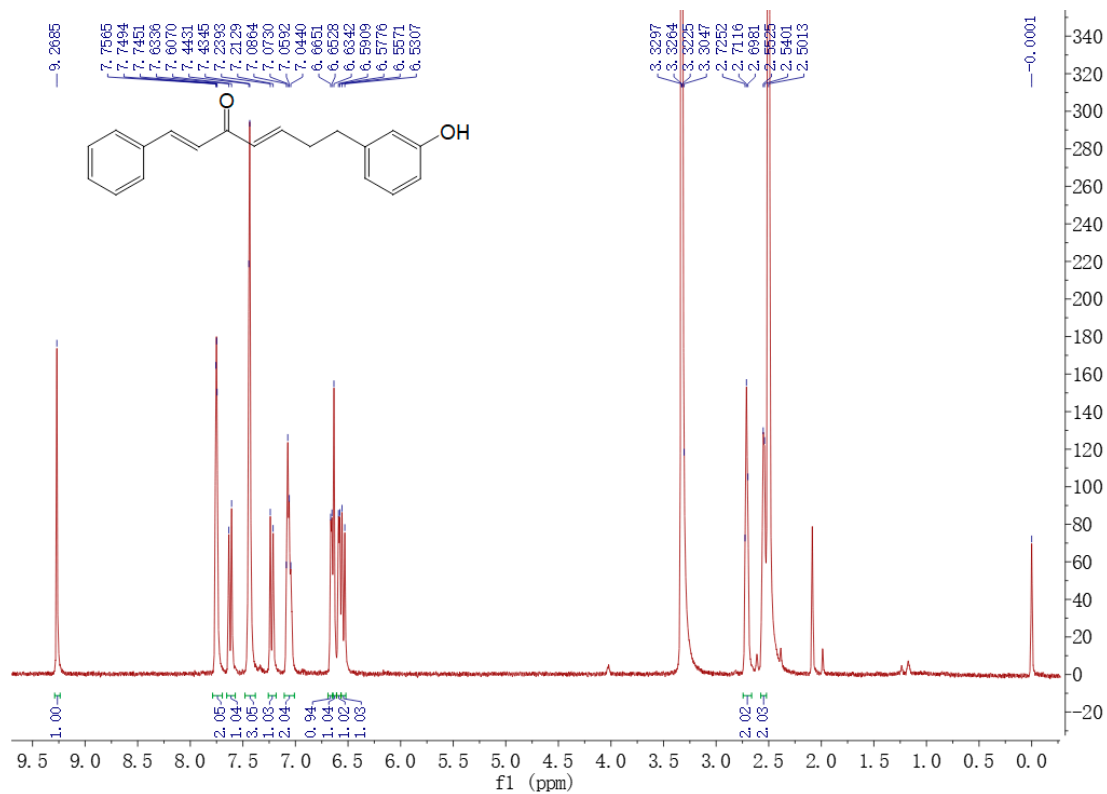

<sup>1</sup>H NMR spectrum of CU-24 (600 MHz, DMSO-*d*<sub>6</sub>)

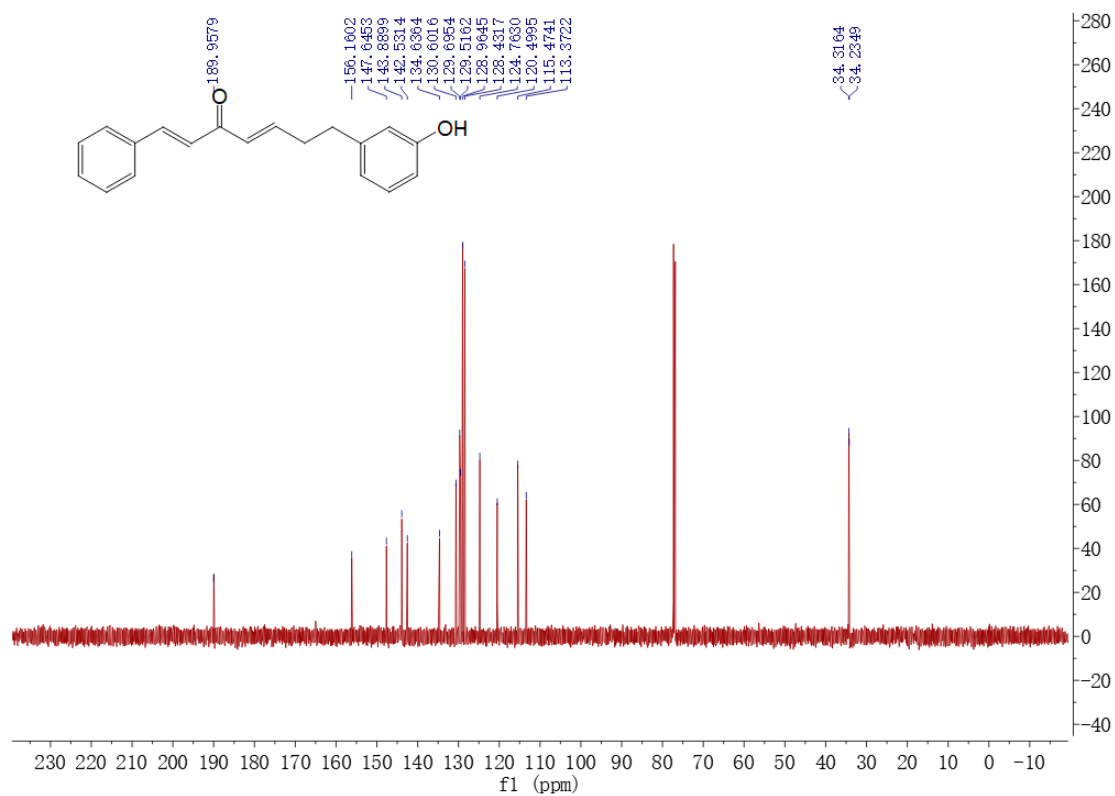

<sup>13</sup>C NMR spectrum of CU-24 (151 MHz, CDCl<sub>3</sub>)



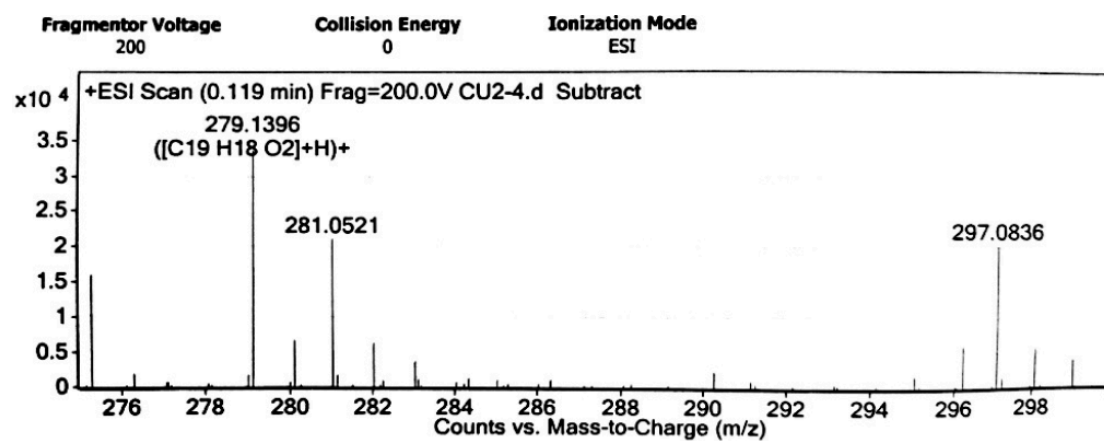

HRMS spectrum of CU-24

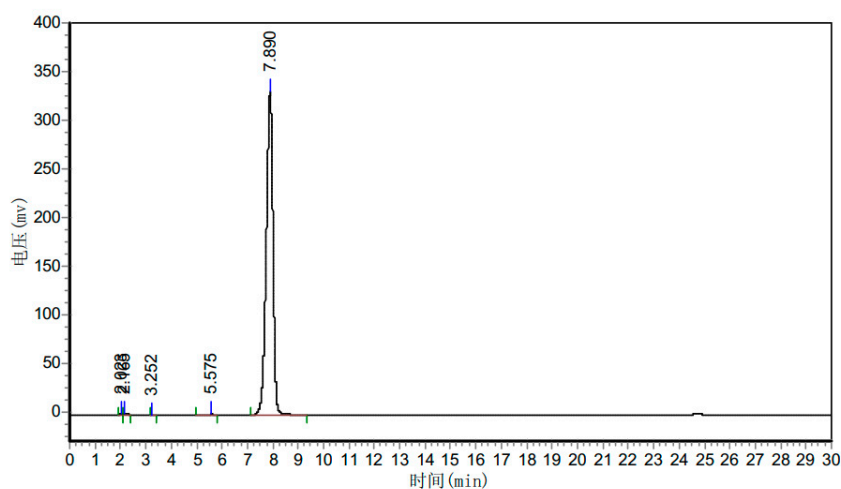

分析结果表

| 峰号 | 峰名 | 保留时间  | 峰高         | 峰面积         | 含量       |
|----|----|-------|------------|-------------|----------|
| 1  |    | 2.023 | 1400.328   | 10989.504   | 0.1784   |
| 2  |    | 2.165 | 2311.156   | 26861.221   | 0.4361   |
| 3  |    | 3.252 | 241.002    | 2239.907    | 0.0364   |
| 4  |    | 5.575 | 595.056    | 6661.798    | 0.1081   |
| 5  |    | 7.890 | 332275.406 | 6113292.000 | 99.2410  |
| 总计 |    |       | 336822.948 | 6160044.429 | 100.0000 |

The HPLC spectrum of CU-24

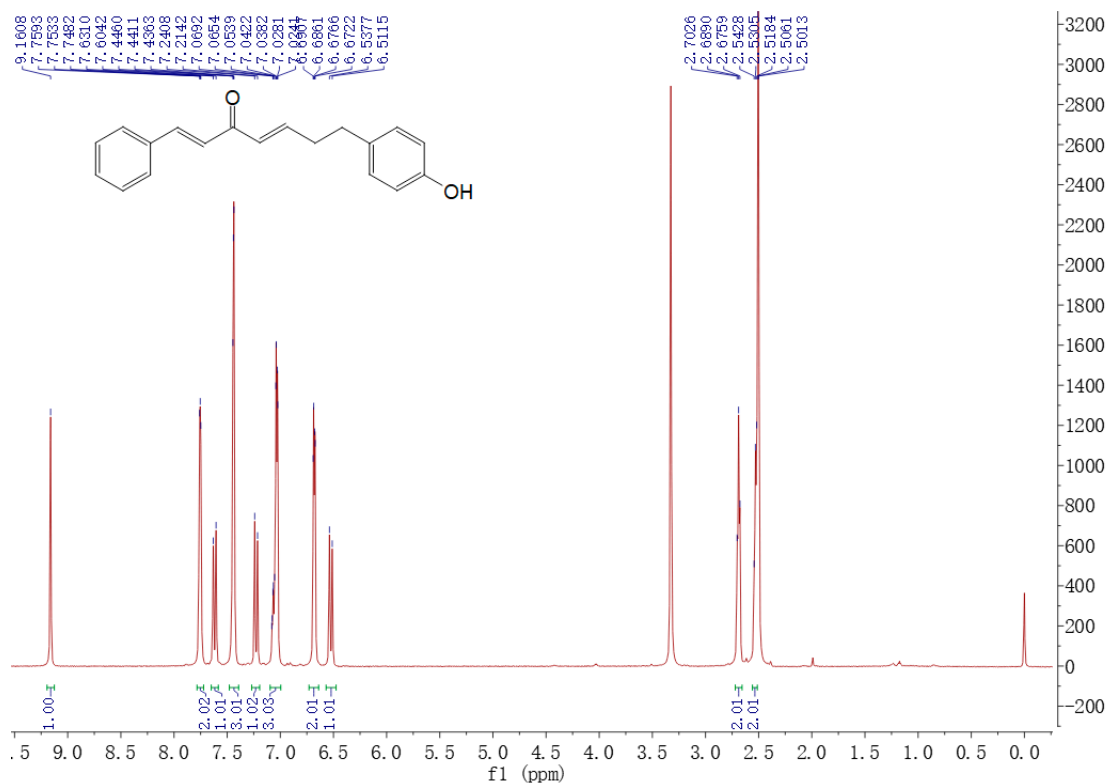

<sup>1</sup>H NMR spectrum of CU-25 (600 MHz, DMSO-*d*<sub>6</sub>)

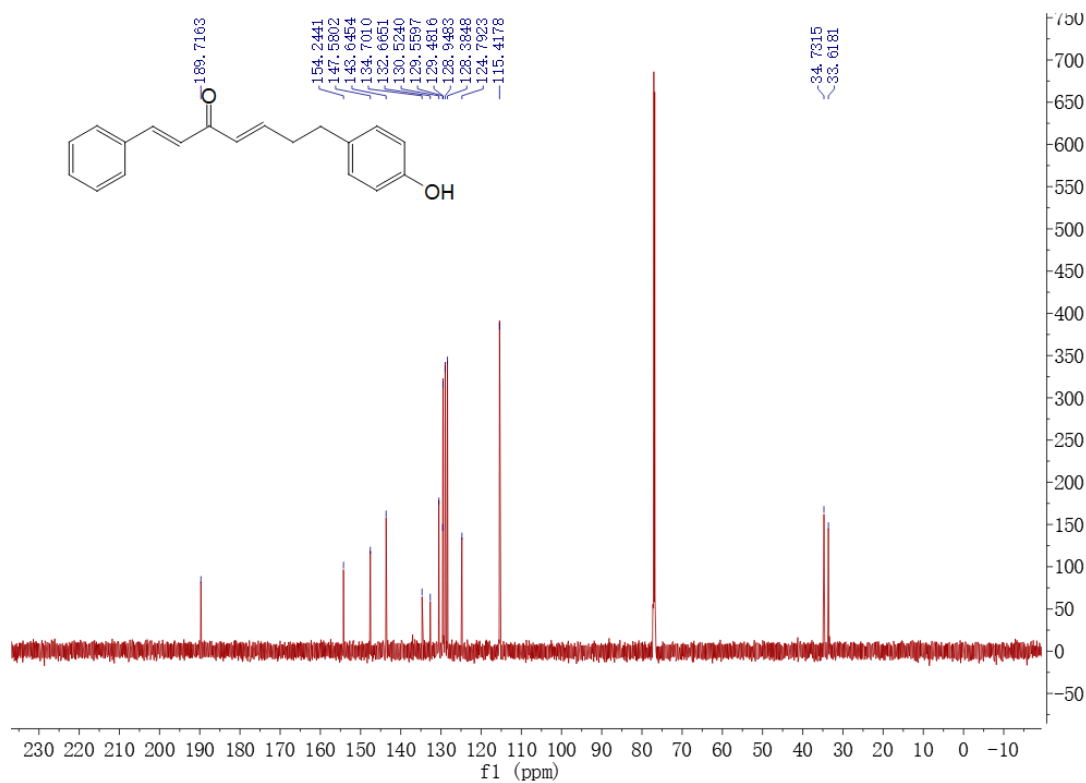

<sup>13</sup>C NMR spectrum of CU-25 (151 MHz, CDCl<sub>3</sub>)

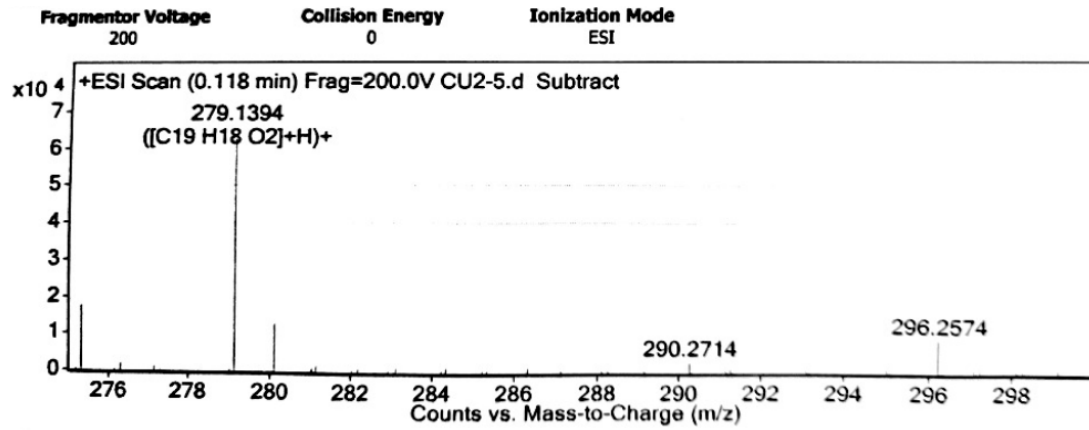

HRMS spectrum of CU-25

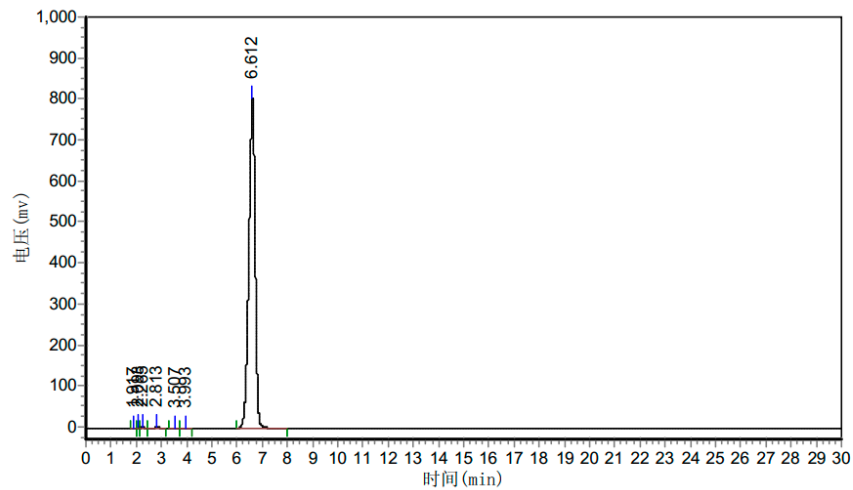

分析结果表

| 峰号 | 峰名 | 保留时间  | 峰高         | 峰面积          | 含量       |
|----|----|-------|------------|--------------|----------|
| 1  |    | 1.917 | 782.113    | 8296.820     | 0.0585   |
| 2  |    | 2.093 | 1728.069   | 11892.307    | 0.0839   |
| 3  |    | 2.265 | 2652.758   | 24651.416    | 0.1739   |
| 4  |    | 2.813 | 5149.940   | 63053.742    | 0.4448   |
| 5  |    | 3.507 | 1232.668   | 21451.383    | 0.1513   |
| 6  |    | 3.993 | 977.338    | 23172.100    | 0.1635   |
| 7  |    | 6.612 | 805443.438 | 14022141.000 | 98.9240  |
| 总计 |    |       | 817966.324 | 14174658.768 | 100.0000 |

The HPLC spectrum of CU-25

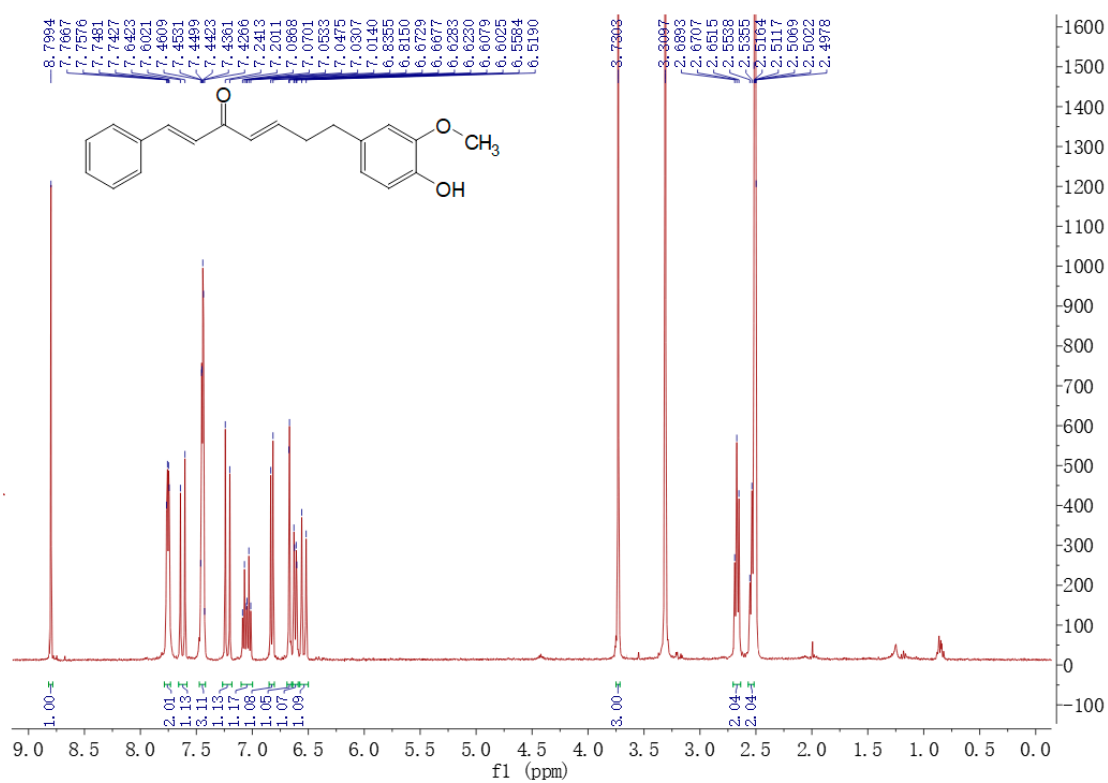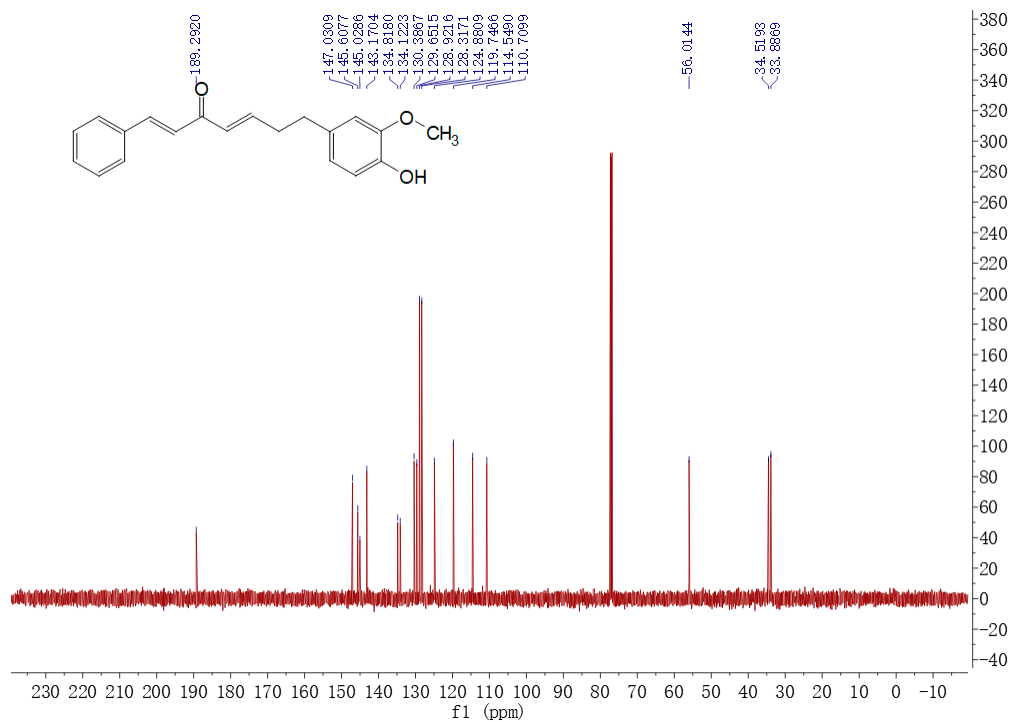

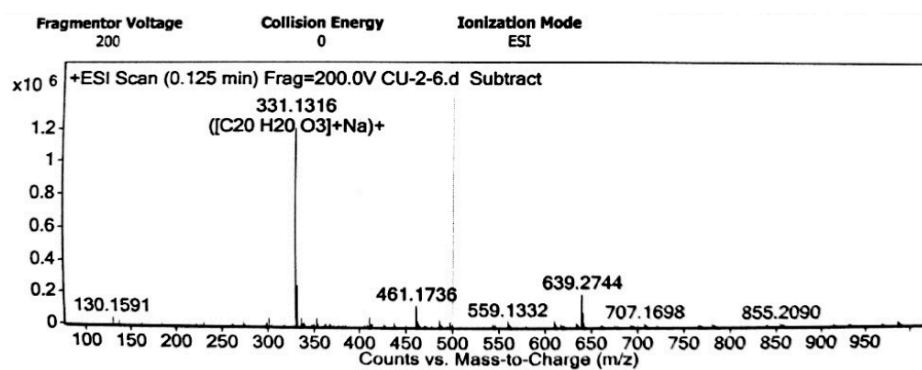

HRMS spectrum of CU-26

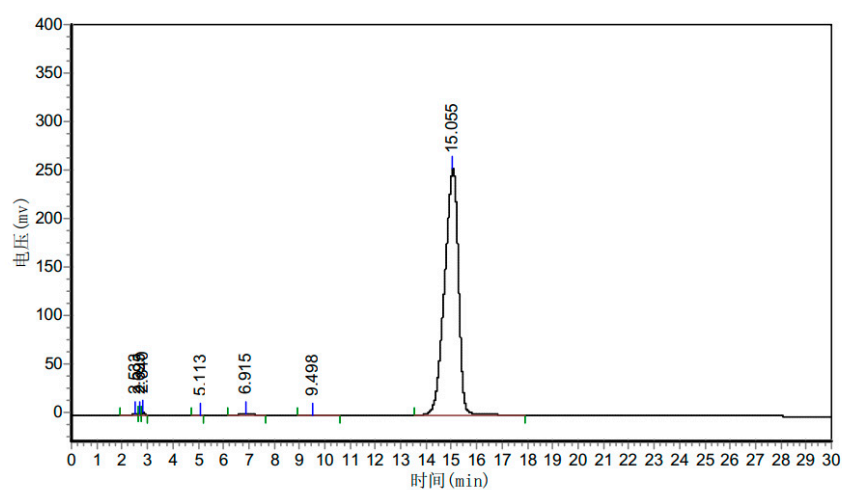

分析结果表

| 峰号 | 峰名 | 保留时间   | 峰高         | 峰面积         | 含量       |
|----|----|--------|------------|-------------|----------|
| 1  |    | 2.533  | 1775.016   | 25576.943   | 0.2628   |
| 2  |    | 2.695  | 1568.596   | 8098.390    | 0.0832   |
| 3  |    | 2.840  | 3193.023   | 29132.199   | 0.2994   |
| 4  |    | 5.113  | 143.329    | 2144.889    | 0.0220   |
| 5  |    | 6.915  | 574.446    | 20796.652   | 0.2137   |
| 6  |    | 9.498  | 252.002    | 8483.975    | 0.0872   |
| 7  |    | 15.055 | 254276.422 | 9637396.000 | 99.0317  |
| 总计 |    |        | 261782.833 | 9731629.049 | 100.0000 |

The HPLC spectrum of CU-26

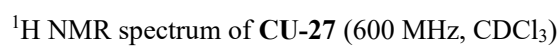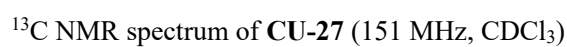

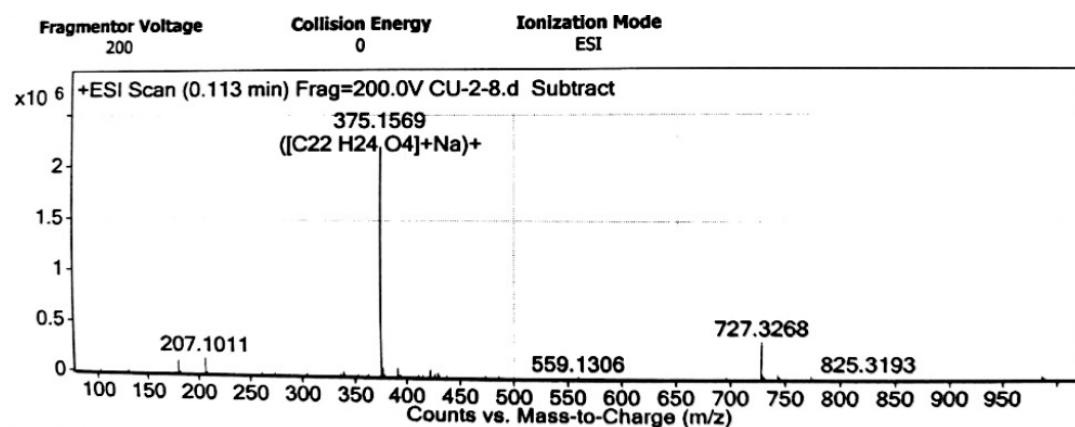

HRMS spectrum of CU-27

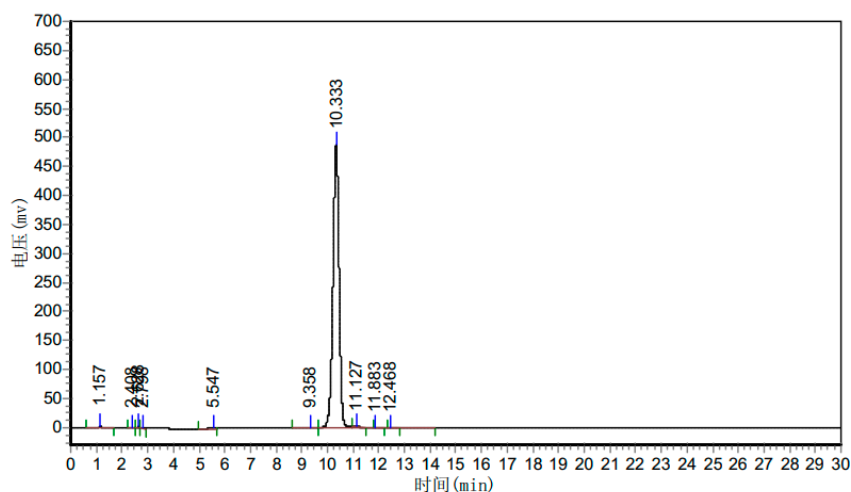

分析结果表

| 峰号 | 峰名 | 保留时间   | 峰高         | 峰面积         | 含量       |
|----|----|--------|------------|-------------|----------|
| 1  |    | 1.157  | 1391.207   | 26807.098   | 0.3168   |
| 2  |    | 2.408  | 1385.321   | 16413.619   | 0.1940   |
| 3  |    | 2.628  | 2304.184   | 19312.771   | 0.2283   |
| 4  |    | 2.798  | 2409.861   | 20278.156   | 0.2397   |
| 5  |    | 5.547  | 347.754    | 8042.631    | 0.0951   |
| 6  |    | 9.358  | 1856.601   | 83053.844   | 0.9816   |
| 7  |    | 10.333 | 488781.063 | 8268843.500 | 97.7295  |
| 8  |    | 11.127 | 1052.964   | 15643.999   | 0.1849   |
| 9  |    | 11.883 | 84.590     | 1271.751    | 0.0150   |
| 10 |    | 12.468 | 68.270     | 1284.000    | 0.0152   |
| 总计 |    |        | 499681.815 | 8460951.370 | 100.0000 |

The HPLC spectrum of CU-27

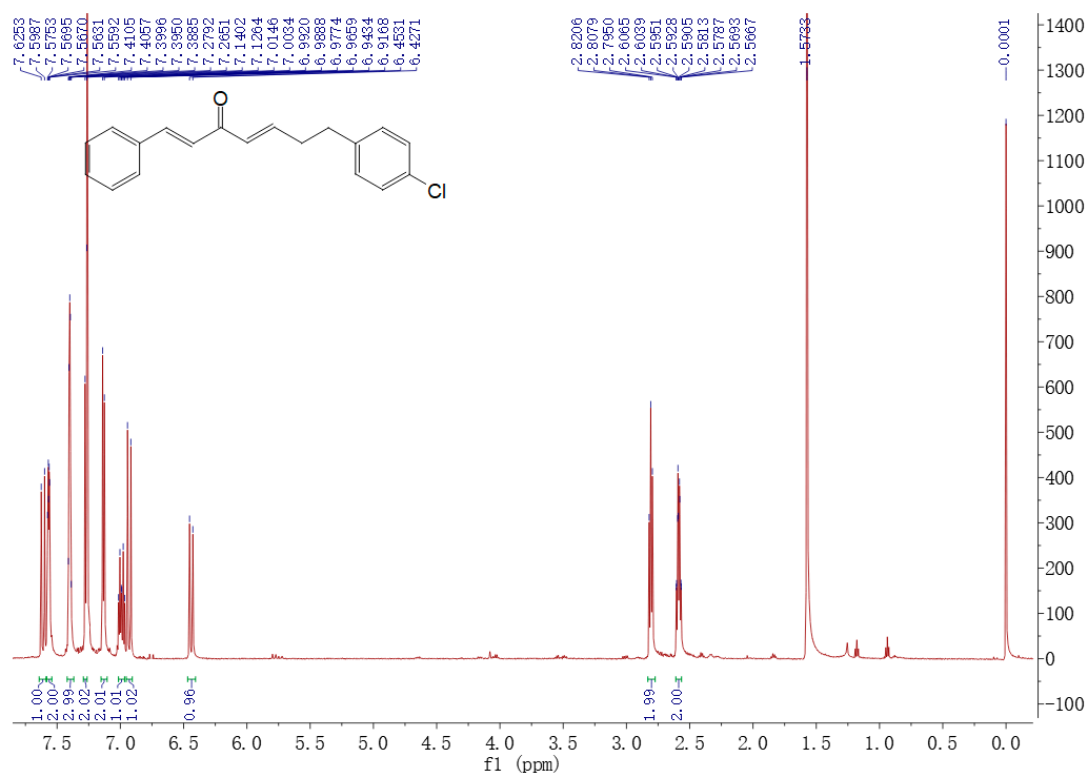

<sup>1</sup>H NMR spectrum of CU-28 (600 MHz, CDCl<sub>3</sub>)

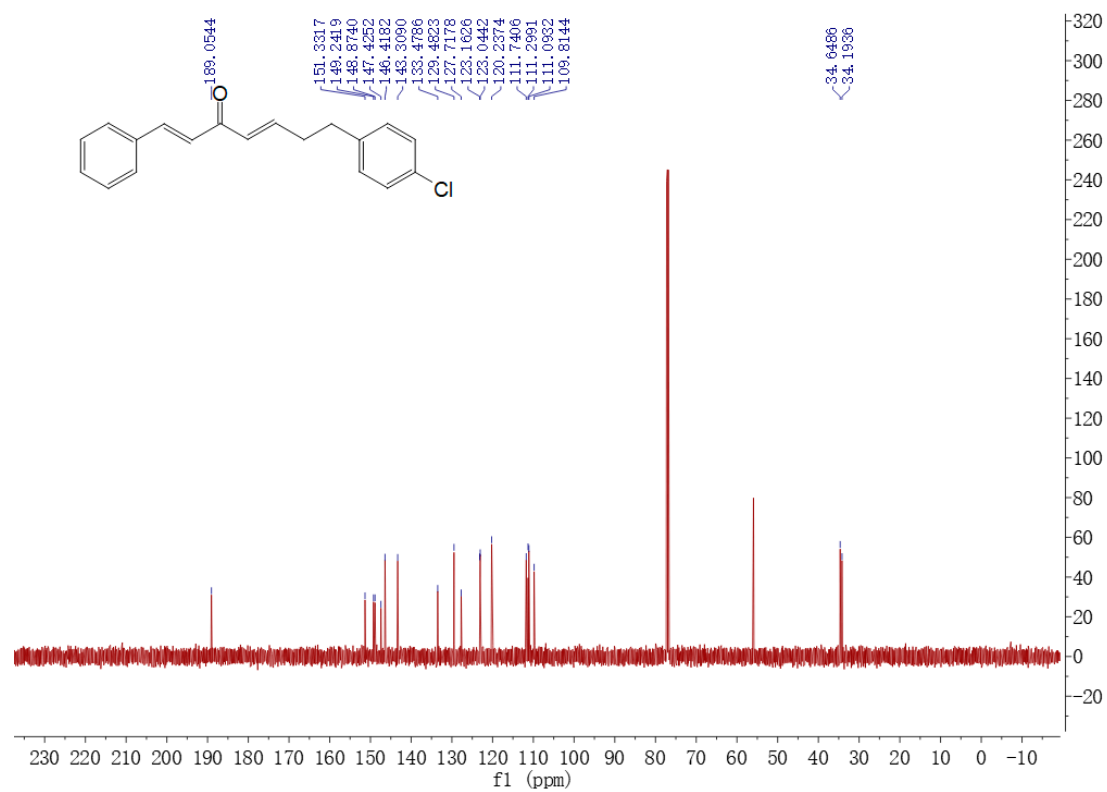

<sup>13</sup>C NMR spectrum of CU-28 (151 MHz, CDCl<sub>3</sub>)



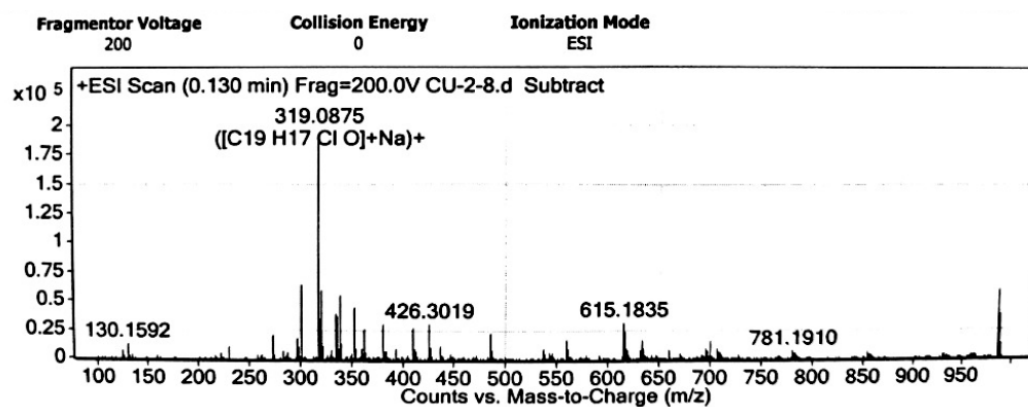

HRMS spectrum of CU-28

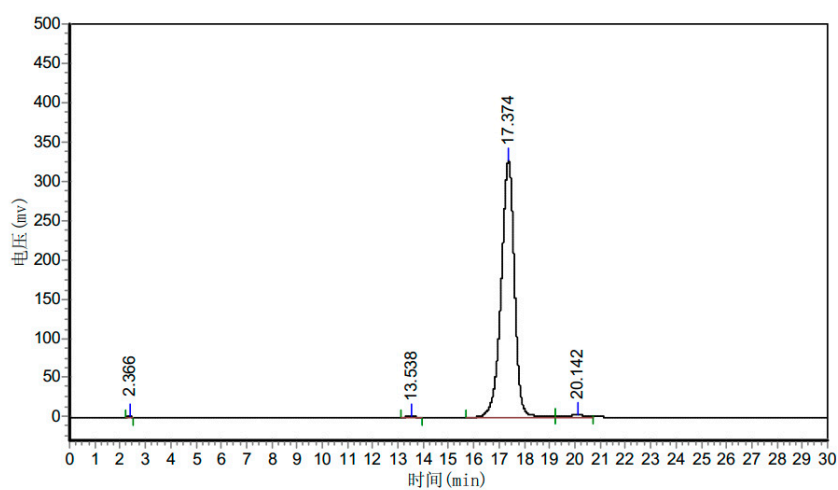

分析结果表

| 峰号 | 峰名 | 保留时间   | 峰高         | 峰面积          | 含量       |
|----|----|--------|------------|--------------|----------|
| 1  |    | 2.366  | 2473.032   | 23140.064    | 0.1888   |
| 2  |    | 13.538 | 1237.150   | 37409.094    | 0.3052   |
| 3  |    | 17.374 | 327512.375 | 11997911.000 | 97.8831  |
| 4  |    | 20.142 | 3512.324   | 177405.109   | 1.4473   |
| 5  |    | 31.581 | 24.725     | 1673.784     | 0.0137   |
| 6  |    | 36.917 | 272.984    | 19852.699    | 0.1620   |
| 总计 |    |        | 335032.591 | 12257391.751 | 100.0000 |

The HPLC spectrum of CU-28
